# Supplementary material for: Regioselective and stereospecific synthesis of functionalized 3,4-dihydro-2H-1,4-thiazines by catalyst-free [3 + 3] annulation of pyridinium 1,4-zwitterionic thiolates and aziridines
Source: Royal Society of Chemistry journal article supplement (doi:10.1039/d2qo00612j), 2022-01-01
Supplement: d2qo00612j1.pdf [file d2qo00612j1.pdf]

## Supporting Information

### Regioselective and stereospecific synthesis of functionalized 3,4-dihydro-2*H*-1,4-thiazines by catalyst-free [3+3] annulation of pyridinium 1,4-zwitterionic thiolates and aziridines

Chuan-Chuan Wang,<sup>‡a</sup> Yan-Tao Yang,<sup>‡b</sup> Qing-Long Wang,<sup>a</sup> Xue-Hua Liu<sup>c</sup> and Ya-Jing  
Chen<sup>\*c</sup>

<sup>a</sup> Faculty of Science, Henan University of Animal Husbandry and Economy, No. 146 Yingcai  
Street, Zhengzhou 450044, Henan, China.

<sup>b</sup> Department of Pharmacy, The First Affiliated Hospital of Zhengzhou University, Zhengzhou  
450052, Henan, China.

<sup>c</sup> School of Pharmaceutical Sciences, Key Laboratory of Advanced Drug Preparation  
Technologies, Ministry of Education of China, Zhengzhou University, 100 Science Avenue,  
Zhengzhou 450001, Henan, China.

<sup>‡</sup> These authors contributed equally to this work.

E-mail: chenyj@zzu.edu.cn.

### Table of Contents

|                                                                       |            |
|-----------------------------------------------------------------------|------------|
| <b>1. General Information.....</b>                                    | <b>S2</b>  |
| <b>2. General Procedures and Analytical Data of the Products.....</b> | <b>S3</b>  |
| <b>3. References.....</b>                                             | <b>S16</b> |
| <b>4. Copies of NMR Spectra .....</b>                                 | <b>S17</b> |
| <b>5. HPLC Chromatograms.....</b>                                     | <b>S51</b> |
| <b>6. Single-Crystal X-Ray Diffraction Data.....</b>                  | <b>S53</b> |

## 1. General Information

All reactions were performed in oven-dried glassware with magnetic stirring. Unless otherwise stated, all reagents were purchased from commercial suppliers and used without further purification. All solvents were purified and dried according to standard methods prior to use. Organic solutions were concentrated under reduced pressure on a rotary evaporator or an oil pump. NMR spectra were recorded on a Bruker AM400 (400 MHz) spectrometer or Agilent DD2 (600 MHz) spectrometer. Chemical shifts are reported in  $\delta$  ppm referenced to an internal SiMe<sub>4</sub> standard for <sup>1</sup>H NMR and chloroform-*d* ( $\delta$  77.16) for <sup>13</sup>C NMR. Data for <sup>1</sup>H NMR are recorded as follows: chemical shift ( $\delta$  ppm), multiplicity (s, singlet; d, doublet; t, triplet; q, quartet; m, multiplet), coupling constant (Hz) and integration. Data for <sup>13</sup>C NMR and <sup>19</sup>F NMR are reported in terms of chemical shift ( $\delta$ , ppm). High-resolution mass spectra (HRMS) were recorded on a Thermo Q-Exactive Spectrometer (ESI source). Reactions were monitored through thin layer chromatography (TLC) on silica gel-precoated glass plates. Flash column chromatography was performed using silica gel (300-400 mesh). CCDC 2131863 (**3aa**) and CCDC 2131862 (**4au**) contain the supplementary crystallographic data for this paper. These data can be obtained free of charge from the Cambridge Crystallographic Data Centre via [www.ccdc.cam.ac.uk/data\\_request/cif](http://www.ccdc.cam.ac.uk/data_request/cif).

Pyridinium 1,4-zwitterionic thiolates **1**<sup>[1]</sup> and aziridines **2**<sup>[2]</sup> were prepared according to the representative methods.

## 2. General Procedures and Analytical Data of the Products

### 2.1 General Procedure for [3+3] Cycloaddition

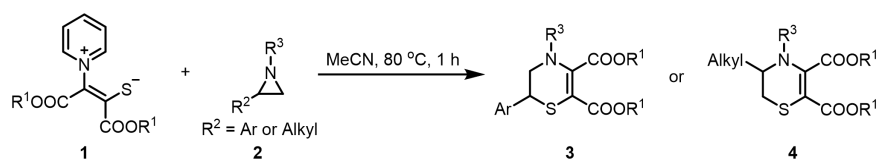

Pyridinium 1,4-zwitterionic thiolates **1** (0.20 mmol, 1.0 equiv.), aziridines **2** (0.30 mmol, 1.5 equiv.) and MeCN (2.0 mL) were sequentially added into a reaction tube under air atmosphere. Then the reaction mixture were stirred at 80 °C for 1 h. After the complete consumption of pyridinium 1,4-zwitterionic thiolates **1**, the reaction mixture was concentrated under reduced pressure and the resulting residue was purified by flash column chromatography (*n*-hexane/ethyl acetate = 6/1) on silica gel to afford the pure products **3** or **4**.

#### Dimethyl 2-phenyl-4-tosyl-3,4-dihydro-2*H*-1,4-thiazine-5,6-dicarboxylate (**3aa**)

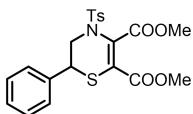

Following the general procedure, the pure title compound was obtained in 84% yield as a white solid. m. p. 125-126 °C. <sup>1</sup>H NMR (400 MHz, CDCl<sub>3</sub>) δ 7.87 (d, *J* = 8.4 Hz, 2H), 7.42-7.30 (m, 5H), 7.22-7.13 (m, 2H), 4.15 (dd, *J* = 14.4, 3.2 Hz, 1H), 3.9 (s, 3H), 3.88-3.79 (m, 4H), 2.95 (dd, *J* = 14.4, 10.8 Hz, 1H), 2.46 (s, 3H) ppm; <sup>13</sup>C NMR (100 MHz, CDCl<sub>3</sub>) δ 164.5, 164.3, 145.4, 135.7, 134.8, 130.2, 129.5, 129.3, 129.1, 128.2, 128.1, 123.6, 53.3, 53.2, 49.4, 43.9, 21.8 ppm. HRMS (ESI) calcd for C<sub>21</sub>H<sub>22</sub>NO<sub>6</sub>S<sub>2</sub> [M+H]<sup>+</sup> 448.0883, found 448.0871.

#### Dimethyl 2-(*o*-tolyl)-4-tosyl-3,4-dihydro-2*H*-1,4-thiazine-5,6-dicarboxylate (**3ab**)

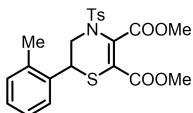

Following the general procedure, the pure title compound was obtained in 99% yield as a white solid. m. p. 94-95 °C. <sup>1</sup>H NMR (400 MHz, CDCl<sub>3</sub>) δ 7.89 (d, *J* = 8.4 Hz, 2H), 7.35 (d, *J* = 8.0 Hz, 2H), 7.24-7.14 (m, 4H), 4.34 (dd, *J* = 10.4, 3.2 Hz, 1H), 4.10 (dd, *J* = 14.4, 3.2 Hz, 1H), 3.90 (s, 3H), 3.83 (s, 3H), 2.98 (dd, *J* = 14.4, 10.4 Hz, 1H),

2.44 (s, 3H), 2.28 (s, 3H) ppm;  $^{13}\text{C}$  NMR (100 MHz,  $\text{CDCl}_3$ )  $\delta$  164.6, 164.4, 145.2, 136.7, 135.1, 134.1, 131.0, 130.2, 129.2, 128.7, 128.3, 127.4, 127.1, 124.1, 53.4, 53.2, 48.5, 40.1, 21.8, 19.4 ppm. HRMS (ESI) calcd for  $\text{C}_{22}\text{H}_{24}\text{NO}_6\text{S}_2$   $[\text{M}+\text{H}]^+$  462.1040, found 462.1028.

## Dimethyl

### 2-(2-chlorophenyl)-4-tosyl-3,4-dihydro-2H-1,4-thiazine-5,6-dicarboxylate (3ac)

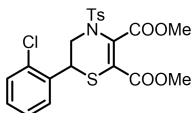

Following the general procedure, the pure title compound was obtained in 80% yield as a white solid. m. p. 92-93 °C.  $^1\text{H}$  NMR (400 MHz,  $\text{CDCl}_3$ )  $\delta$  7.87 (d,  $J = 8.4$  Hz, 2H), 7.40-7.33 (m, 3H), 7.33-7.22 (m, 3H), 4.48 (dd,  $J = 10.4, 3.2$  Hz, 1H), 4.25 (dd,  $J = 14.4, 3.2$  Hz, 1H), 3.91 (s, 3H), 3.83 (s, 3H), 3.02 (dd,  $J = 14.4, 10.4$  Hz, 1H), 2.45 (s, 3H) ppm.  $^{13}\text{C}$  NMR (100 MHz,  $\text{CDCl}_3$ )  $\delta$  164.3 (2C), 145.3, 135.0, 134.0, 133.6, 130.4, 130.22, 130.18, 130.1, 129.3, 128.2, 127.8, 122.8, 53.38, 53.35, 48.0, 40.0, 21.8 ppm. HRMS (ESI) calcd for  $\text{C}_{21}\text{H}_{21}\text{ClNO}_6\text{S}_2$   $[\text{M}+\text{H}]^+$  482.0493, found 482.0486.

### Dimethyl 2-(*m*-tolyl)-4-tosyl-3,4-dihydro-2H-1,4-thiazine-5,6-dicarboxylate (3ad)

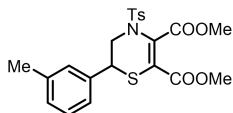

Following the general procedure, the pure title compound was obtained in 88% yield as a white solid. m. p. 146-147 °C.  $^1\text{H}$  NMR (400 MHz,  $\text{CDCl}_3$ )  $\delta$  7.88 (d,  $J = 8.4$  Hz, 2H), 7.37 (d,  $J = 8.0$  Hz, 2H), 7.25-7.21 (m, 1H), 7.17-7.11 (m, 1H), 7.02-6.94 (m, 2H), 4.14 (dd,  $J = 14.4, 3.2$  Hz, 1H), 3.90 (s, 3H), 3.87-3.80 (m, 4H), 2.94 (dd,  $J = 14.4, 10.4$  Hz, 1H), 2.46 (s, 3H), 2.33 (s, 3H) ppm.  $^{13}\text{C}$  NMR (100 MHz,  $\text{CDCl}_3$ )  $\delta$  164.6, 164.4, 145.3, 139.1, 135.7, 134.9, 130.2, 129.9, 129.4, 129.1, 128.7, 128.3, 125.1, 123.8, 53.3, 53.2, 49.5, 44.0, 21.8, 21.5 ppm. HRMS (ESI) calcd for  $\text{C}_{22}\text{H}_{23}\text{NNaO}_6\text{S}_2$   $[\text{M}+\text{Na}]^+$  484.0859, found 484.0865.

### Dimethyl 2-(3-chlorophenyl)-4-tosyl-3,4-dihydro-2H-1,4-thiazine-5,6-dicarboxylate (3ae)

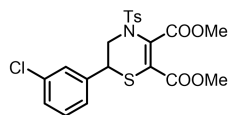

Following the general procedure, the pure title compound was obtained in 66% yield as a white solid. m. p. 174-175 °C. <sup>1</sup>H NMR (400 MHz, CDCl<sub>3</sub>) δ 7.88 (d, *J* = 8.4 Hz, 2H), 7.39 (d, *J* = 8.4 Hz, 2H), 7.33-7.25 (m, 2H), 7.17 (s, 1H), 7.12-7.06 (m, 1H), 4.12 (dd, *J* = 14.4, 3.2 Hz, 1H), 3.90 (s, 3H), 3.88-3.81 (m, 4H), 2.91 (dd, *J* = 14.4, 10.4 Hz, 1H), 2.47 (s, 3H) ppm. <sup>13</sup>C NMR (100 MHz, CDCl<sub>3</sub>) δ 164.3, 164.2, 145.5, 137.8, 135.1, 134.7, 130.5, 130.3, 129.8, 129.3, 128.3, 128.2, 126.3, 123.0, 53.4, 53.3, 49.3, 43.6, 21.8 ppm. HRMS (ESI) calcd for C<sub>21</sub>H<sub>21</sub>ClNO<sub>6</sub>S<sub>2</sub> [M+H]<sup>+</sup> 482.0493, found 482.0480.

**Dimethyl 2-(3-bromophenyl)-4-tosyl-3,4-dihydro-2H-1,4-thiazine-5,6-dicarboxylate (3af)**

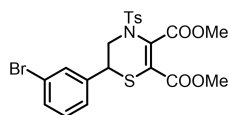

Following the general procedure, the pure title compound was obtained in 59% yield as a white solid. m. p. 172-173 °C. <sup>1</sup>H NMR (400 MHz, CDCl<sub>3</sub>) δ 7.88 (d, *J* = 8.4 Hz, 2H), 7.51-7.43 (m, 1H), 7.38 (d, *J* = 8.4 Hz, 2H), 7.35-7.31 (m, 1H), 7.25-7.21 (m, 1H), 7.16-7.10 (m, 1H), 4.11 (dd, *J* = 14.4, 3.2 Hz, 1H), 3.90 (s, 3H), 3.88-3.80 (m, 4H), 2.91 (dd, *J* = 14.4, 10.4 Hz, 1H), 2.47 (s, 3H) ppm. <sup>13</sup>C NMR (100 MHz, CDCl<sub>3</sub>) δ 164.3, 164.2, 145.5, 138.1, 134.7, 132.3, 131.3, 130.8, 130.3, 129.8, 128.3, 126.8, 123.2, 123.1, 53.4, 53.3, 49.3, 43.6, 21.8 ppm. HRMS (ESI) calcd for C<sub>21</sub>H<sub>21</sub><sup>79</sup>BrNO<sub>6</sub>S<sub>2</sub> [M+H]<sup>+</sup> 525.9988, found 525.9972.

**Dimethyl 2-(*p*-tolyl)-4-tosyl-3,4-dihydro-2H-1,4-thiazine-5,6-dicarboxylate (3ag)**

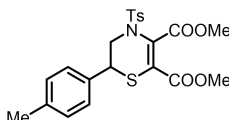

Following the general procedure, the pure title compound was obtained in 95% yield as a white solid. m. p. 110-111 °C. <sup>1</sup>H NMR (400 MHz, CDCl<sub>3</sub>) δ 7.86 (d, *J* = 8.4 Hz, 2H), 7.37 (d, *J* = 8.4 Hz, 2H), 7.15 (d, *J* = 8.0 Hz, 2H), 7.06 (d, *J* = 8.0 Hz, 2H), 4.13 (dd, *J* = 14.4, 3.2 Hz, 1H), 3.90 (s, 3H), 3.82-3.79 (m, 4H), 2.93 (dd, *J* = 14.4, 10.4 Hz,

1H), 2.46 (s, 3H), 2.33 (s, 3H) ppm. <sup>13</sup>C NMR (100 MHz, CDCl<sub>3</sub>) δ 164.5, 164.4, 145.3, 139.1, 134.8, 132.7, 130.2, 129.9, 129.3, 128.2, 127.9, 123.8, 53.3, 53.2, 49.4, 43.6, 21.8, 21.2 ppm. HRMS (ESI) calcd for C<sub>22</sub>H<sub>24</sub>NO<sub>6</sub>S<sub>2</sub> [M+H]<sup>+</sup> 462.1040, found 462.1053.

**Dimethyl 2-(4-(tert-butyl)phenyl)-4-tosyl-3,4-dihydro-2H-1,4-thiazine-5,6-dicarboxylate (3ah)**

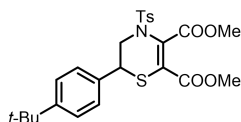

Following the general procedure, the pure title compound was obtained in 95% yield as a white solid. m. p. 89-90 °C. <sup>1</sup>H NMR (400 MHz, CDCl<sub>3</sub>) δ 7.79 (d, *J* = 8.4 Hz, 2H), 7.33-7.25 (m, 4H), 7.03 (d, *J* = 8.4 Hz, 2H), 4.07 (dd, *J* = 14.4, 3.2 Hz, 1H), 3.82 (s, 3H), 3.78-3.70 (m, 4H), 2.87 (dd, *J* = 14.4, 10.4 Hz, 1H), 2.38 (s, 3H), 1.22 (s, 9H) ppm. <sup>13</sup>C NMR (100 MHz, CDCl<sub>3</sub>) δ 164.6, 164.4, 152.3, 145.3, 134.8, 132.7, 130.2, 129.4, 128.3, 127.8, 126.2, 123.9, 53.3, 53.2, 49.4, 43.6, 34.8, 31.3, 21.8 ppm. HRMS (ESI) calcd for C<sub>25</sub>H<sub>30</sub>NO<sub>6</sub>S<sub>2</sub> [M+H]<sup>+</sup> 504.1509, found 504.1497.

**Dimethyl 2-([1,1'-biphenyl]-4-yl)-4-tosyl-3,4-dihydro-2H-1,4-thiazine-5,6-dicarboxylate (3ai)**

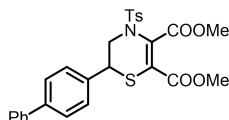

Following the general procedure, the pure title compound was obtained in 82% yield as a white solid. m. p. 80-81 °C. <sup>1</sup>H NMR (400 MHz, CDCl<sub>3</sub>) δ 7.82 (d, *J* = 8.4 Hz, 2H), 7.52-7.45 (m, 4H), 7.39-7.34 (m, 2H), 7.33-7.26 (m, 3H), 7.20-7.15 (m, 2H), 4.11 (dd, *J* = 14.4, 3.2 Hz, 1H), 3.87-3.81 (m, 4H), 3.76 (s, 3H), 2.92 (dd, *J* = 14.4, 10.4 Hz, 1H), 2.39 (s, 3H) ppm. <sup>13</sup>C NMR (100 MHz, CDCl<sub>3</sub>) δ 164.5, 164.4, 145.4, 142.1, 140.3, 134.8, 134.7, 130.3, 129.5, 129.0, 128.5, 128.3, 128.0, 127.9, 127.2, 123.7, 53.4, 53.3, 49.4, 43.8, 21.8 ppm. HRMS (ESI) calcd for C<sub>27</sub>H<sub>26</sub>NO<sub>6</sub>S<sub>2</sub> [M+H]<sup>+</sup> 524.1196, found 524.1188.

**Dimethyl 2-(4-methoxyphenyl)-4-tosyl-3,4-dihydro-2H-1,4-thiazine-5,6-dicarboxylate (3aj)**

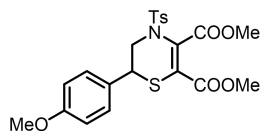

Following the general procedure, the pure title compound was obtained in 85% yield as a white solid. m. p. 118-119 °C.  $^1\text{H}$  NMR (400 MHz,  $\text{CDCl}_3$ )  $\delta$  7.87 (d,  $J = 8.4$  Hz, 2H), 7.37 (d,  $J = 8.4$  Hz, 2H), 7.09 (d,  $J = 8.4$  Hz, 2H), 6.86 (d,  $J = 8.4$  Hz, 2H), 4.12 (dd,  $J = 14.4, 3.2$  Hz, 1H), 3.89 (s, 3H), 3.84-3.80 (m, 4H), 3.79 (s, 3H), 2.92 (dd,  $J = 14.4, 10.4$  Hz, 1H), 2.46 (s, 3H) ppm.  $^{13}\text{C}$  NMR (100 MHz,  $\text{CDCl}_3$ )  $\delta$  164.6, 164.4, 160.1, 145.3, 134.9, 130.2, 129.33, 129.26, 128.3, 127.6, 124.0, 114.6, 55.5, 53.3, 53.2, 49.6, 43.4, 21.8 ppm. HRMS (ESI) calcd for  $\text{C}_{22}\text{H}_{24}\text{NO}_7\text{S}_2$   $[\text{M}+\text{H}]^+$  478.0989, found 478.0998.

**Dimethyl 2-(4-fluorophenyl)-4-tosyl-3,4-dihydro-2H-1,4-thiazine-5,6-dicarboxylate (3ak)**

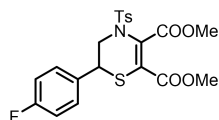

Following the general procedure, the pure title compound was obtained in 81% yield as a white solid. m. p. 162-163 °C.  $^1\text{H}$  NMR (400 MHz,  $\text{CDCl}_3$ )  $\delta$  7.88 (d,  $J = 8.4$  Hz, 2H), 7.38 (d,  $J = 8.0$  Hz, 2H), 7.21-7.12 (m, 2H), 7.08-6.98 (m, 2H), 4.11 (dd,  $J = 14.4, 3.2$  Hz, 1H), 3.92-3.85 (m, 4H), 3.83 (s, 3H), 2.91 (dd,  $J = 14.4, 10.4$  Hz, 1H), 2.46 (s, 3H) ppm.  $^{13}\text{C}$  NMR (100 MHz,  $\text{CDCl}_3$ )  $\delta$  164.4, 164.3, 163.0 (d,  $J = 248.0$  Hz), 145.4, 134.8, 131.7 (d,  $J = 3.0$  Hz), 130.3, 129.9 (d,  $J = 9.0$  Hz), 129.7, 128.3, 123.4, 116.3 (d,  $J = 22.0$  Hz), 53.4, 53.3, 49.5, 43.4, 21.8 ppm.  $^{19}\text{F}$  NMR (376 MHz,  $\text{CDCl}_3$ )  $\delta$  -112.0 ppm. HRMS (ESI) calcd for  $\text{C}_{21}\text{H}_{21}\text{FNO}_6\text{S}_2$   $[\text{M}+\text{H}]^+$  466.0789, found 466.0778.

**Dimethyl 2-(4-chlorophenyl)-4-tosyl-3,4-dihydro-2H-1,4-thiazine-5,6-dicarboxylate (3al)**

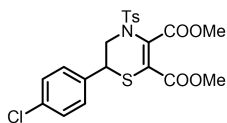

Following the general procedure, the pure title compound was obtained in 81% yield as a white solid. m. p. 130-131 °C.  $^1\text{H}$  NMR (400 MHz,  $\text{CDCl}_3$ )  $\delta$  7.87 (d,  $J = 8.4$  Hz,

2H), 7.38 (d,  $J = 8.4$  Hz, 2H), 7.32 (d,  $J = 8.4$  Hz, 2H), 7.13 (d,  $J = 8.4$  Hz, 2H), 4.10 (dd,  $J = 14.4, 3.2$  Hz, 1H), 3.93-3.85 (m, 4H), 3.83 (s, 3H), 2.91 (dd,  $J = 14.4, 10.4$  Hz, 1H), 2.46 (s, 3H) ppm.  $^{13}\text{C}$  NMR (100 MHz,  $\text{CDCl}_3$ )  $\delta$  164.4, 164.3, 145.5, 135.1, 134.8, 134.4, 130.3, 129.7, 129.5, 129.5, 128.3, 123.2, 53.4, 53.3, 49.4, 43.5, 21.8 ppm. HRMS (ESI) calcd for  $\text{C}_{21}\text{H}_{21}\text{ClNO}_6\text{S}_2$   $[\text{M}+\text{H}]^+$  482.0493, found 482.0477.

**Dimethyl 2-(4-bromophenyl)-4-tosyl-3,4-dihydro-2H-1,4-thiazine-5,6-dicarboxylate (3am)**

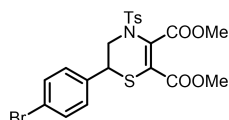

Following the general procedure, the pure title compound was obtained in 84% yield as a white solid. m. p. 112-114 °C.  $^1\text{H}$  NMR (400 MHz,  $\text{CDCl}_3$ )  $\delta$  7.87 (d,  $J = 8.4$  Hz, 2H), 7.48 (d,  $J = 8.4$  Hz, 2H), 7.38 (d,  $J = 8.0$  Hz, 2H), 7.07 (d,  $J = 8.4$  Hz, 2H), 4.10 (dd,  $J = 14.4, 3.2$  Hz, 1H), 3.90 (s, 3H), 3.86 (dd,  $J = 10.4, 3.2$  Hz, 1H), 3.83 (s, 3H), 2.90 (dd,  $J = 14.4, 10.4$  Hz, 1H), 2.46 (s, 3H) ppm.  $^{13}\text{C}$  NMR (100 MHz,  $\text{CDCl}_3$ )  $\delta$  164.3, 164.2, 145.5, 134.8, 134.7, 132.5, 130.3, 129.72, 129.70, 128.2, 123.2, 123.1, 53.4, 53.3, 49.3, 43.5, 21.8 ppm. HRMS (ESI) calcd for  $\text{C}_{21}\text{H}_{21}^{79}\text{BrNO}_6\text{S}_2$   $[\text{M}+\text{H}]^+$  525.9988, found 525.9977.

**Dimethyl 4-tosyl-2-(4-(trifluoromethyl)phenyl)-3,4-dihydro-2H-1,4-thiazine-5,6-dicarboxylate (3an)**

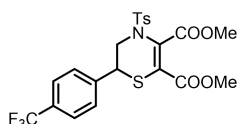

Following the general procedure, the pure title compound was obtained in 66% yield as a white solid. m. p. 115-116 °C.  $^1\text{H}$  NMR (400 MHz,  $\text{CDCl}_3$ )  $\delta$  7.88 (d,  $J = 8.4$  Hz, 2H), 7.62 (d,  $J = 8.4$  Hz, 2H), 7.38 (d,  $J = 8.0$  Hz, 2H), 7.34 (d,  $J = 8.0$  Hz, 2H), 4.12 (dd,  $J = 14.4, 3.4$  Hz, 1H), 3.98 (dd,  $J = 10.4, 3.2$  Hz, 1H), 3.90 (s, 3H), 3.84 (s, 3H), 2.95 (dd,  $J = 14.4, 10.4$  Hz, 1H), 2.46 (s, 3H) ppm.  $^{13}\text{C}$  NMR (100 MHz,  $\text{CDCl}_3$ )  $\delta$  164.3, 164.2, 145.6, 139.9, 134.7, 131.4 (q,  $J = 33.0$  Hz), 130.3, 130.0, 128.6, 128.3, 126.3 (q,  $J = 3.0$  Hz), 126.2, 124.0 (q,  $J = 236.0$  Hz), 53.4, 53.3, 49.3, 43.7, 21.8 ppm.



$^{19}\text{F}$  NMR (376 MHz,  $\text{CDCl}_3$ )  $\delta$  -62.8 ppm. HRMS (ESI) calcd for  $\text{C}_{22}\text{H}_{21}\text{F}_3\text{NO}_6\text{S}_2$   $[\text{M}+\text{H}]^+$  516.0757, found 516.0773.

**Dimethyl 2-(4-nitrophenyl)-4-tosyl-3,4-dihydro-2H-1,4-thiazine-5,6-dicarboxylate (3ao)**

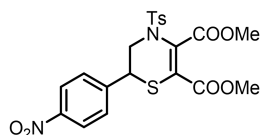

Following the general procedure, the pure title compound was obtained in 53% yield as a yellow solid. m. p. 160-161 °C.  $^1\text{H}$  NMR (600 MHz,  $\text{CDCl}_3$ )  $\delta$  8.21 (d,  $J$  = 9.0 Hz, 2H), 7.88 (d,  $J$  = 8.4 Hz, 2H), 7.41 (d,  $J$  = 9.0 Hz, 2H), 7.38 (d,  $J$  = 8.4 Hz, 2H), 4.12 (dd,  $J$  = 13.8, 3.0 Hz, 1H), 4.08 (dd,  $J$  = 10.2, 3.0 Hz, 1H), 3.90 (s, 3H), 3.84 (s, 3H), 2.97 (dd,  $J$  = 13.8, 10.2 Hz, 1H), 2.47 (s, 3H) ppm.  $^{13}\text{C}$  NMR (151 MHz,  $\text{CDCl}_3$ )  $\delta$  164.15, 164.06, 148.3, 145.6, 143.0, 134.7, 130.33, 130.29, 129.3, 128.3, 124.5, 122.3, 53.5, 53.4, 49.2, 43.7, 21.8 ppm. HRMS (ESI) calcd for  $\text{C}_{21}\text{H}_{21}\text{N}_2\text{O}_8\text{S}_2$   $[\text{M}+\text{H}]^+$  493.0734, found 493.0722.

**Dimethyl 2-(4-(methoxycarbonyl)phenyl)-4-tosyl-3,4-dihydro-2H-1,4-thiazine-5,6-dicarboxylate (3ap)**

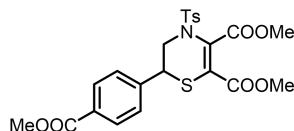

Following the general procedure, the pure title compound was obtained in 62% yield as colorless oil.  $^1\text{H}$  NMR (400 MHz,  $\text{CDCl}_3$ )  $\delta$  8.01 (d,  $J$  = 8.4 Hz, 2H), 7.88 (d,  $J$  = 8.4 Hz, 2H), 7.39 (d,  $J$  = 8.4 Hz, 2H), 7.28 (d,  $J$  = 8.4 Hz, 2H), 4.17-4.11 (m, 1H), 3.97-3.93 (m, 1H), 3.92 (s, 3H), 3.90 (s, 3H), 3.83 (s, 3H), 2.97 (dd,  $J$  = 14.4, 10.4 Hz, 1H), 2.47 (s, 3H) ppm.  $^{13}\text{C}$  NMR (100 MHz,  $\text{CDCl}_3$ )  $\delta$  166.4, 164.3, 164.2, 145.5, 140.7, 134.7, 130.9, 130.5, 130.3, 129.8, 128.22, 128.17, 122.9, 53.4, 53.3, 52.4, 49.2, 43.8, 21.8 ppm. HRMS (ESI) calcd for  $\text{C}_{23}\text{H}_{24}\text{NO}_8\text{S}_2$   $[\text{M}+\text{H}]^+$  506.0938, found 506.0947.

**Dimethyl 2-(4-cyanophenyl)-4-tosyl-3,4-dihydro-2H-1,4-thiazine-5,6-dicarboxylate (3aq)**

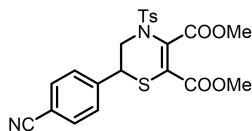

Following the general procedure, the pure title compound was obtained in 59% yield as colorless oil.  $^1\text{H}$  NMR (400 MHz,  $\text{CDCl}_3$ )  $\delta$  7.88 (d,  $J = 8.4$  Hz, 2H), 7.66 (d,  $J = 8.4$  Hz, 2H), 7.38 (d,  $J = 8.4$  Hz, 2H), 7.34 (d,  $J = 8.4$  Hz, 2H), 4.13 (dd,  $J = 14.4, 3.2$  Hz, 1H), 4.00 (dd,  $J = 10.4, 3.2$  Hz, 1H), 3.90 (s, 3H), 3.83 (s, 3H), 2.94 (dd,  $J = 14.4, 10.4$  Hz, 1H), 2.47 (s, 3H) ppm.  $^{13}\text{C}$  NMR (100 MHz,  $\text{CDCl}_3$ )  $\delta$  164.15, 164.06, 145.6, 141.1, 134.6, 133.0, 130.3, 130.1, 129.0, 128.2, 122.4, 118.1, 113.1, 53.4, 53.3, 49.1, 43.9, 21.8 ppm. HRMS (ESI) calcd for  $\text{C}_{22}\text{H}_{21}\text{N}_2\text{O}_6\text{S}_2$   $[\text{M}+\text{H}]^+$  473.0836, found 473.0851.

**Dimethyl 2-(naphthalen-2-yl)-4-tosyl-3,4-dihydro-2H-1,4-thiazine-5,6-dicarboxylate (3ar)**

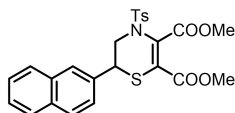

Following the general procedure, the pure title compound was obtained in 92% yield as a white solid. m. p. 79-80 °C.  $^1\text{H}$  NMR (400 MHz,  $\text{CDCl}_3$ )  $\delta$  7.91-7.89 (m, 2H), 7.86-7.76 (m, 3H), 7.68 (s, 1H), 7.54-7.47 (m, 2H), 7.38 (d,  $J = 8.4$  Hz, 2H), 7.28-7.26 (m, 1H), 4.21 (dd,  $J = 14.4, 3.2$  Hz, 1H), 4.09 (dd,  $J = 10.4, 3.2$  Hz, 1H), 3.91 (s, 3H), 3.84 (s, 3H), 3.06 (dd,  $J = 14.0, 10.4$  Hz, 1H), 2.47 (s, 3H) ppm.  $^{13}\text{C}$  NMR (100 MHz,  $\text{CDCl}_3$ )  $\delta$  164.6, 164.4, 145.4, 134.9, 133.5, 133.3, 133.0, 130.3, 129.6, 129.3, 128.3, 128.0, 127.9, 127.6, 126.9, 125.2, 123.8, 53.4, 53.3, 49.5, 44.4, 21.8 ppm. HRMS (ESI) calcd for  $\text{C}_{25}\text{H}_{24}\text{NO}_6\text{S}_2$   $[\text{M}+\text{H}]^+$  498.1040, found 498.1055.

**Dimethyl 2-phenyl-4-(phenylsulfonyl)-3,4-dihydro-2H-1,4-thiazine-5,6-dicarboxylate (3as)**

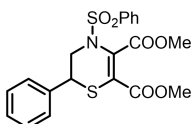

Following the general procedure, the pure title compound was obtained in 91% yield as a white solid. m. p. 64-65 °C.  $^1\text{H}$  NMR (400 MHz,  $\text{CDCl}_3$ )  $\delta$  8.05-7.97 (m, 2H),

7.72-7.65 (m, 1H), 7.63-7.56 (m, 2H), 7.38-7.30 (m, 3H), 7.21-7.14 (m, 2H), 4.16 (dd,  $J = 14.4, 3.2$  Hz, 1H), 3.90 (s, 3H), 3.86 (dd,  $J = 10.4, 2.8$  Hz, 1H), 3.83 (s, 3H), 2.97 (dd,  $J = 14.4, 10.4$  Hz, 1H) ppm.  $^{13}\text{C}$  NMR (100 MHz,  $\text{CDCl}_3$ )  $\delta$  164.5, 164.3, 137.8, 135.7, 134.2, 129.7, 129.3 (3C), 129.2, 128.2, 128.1, 124.1, 53.4, 53.3, 49.4, 44.1 ppm. HRMS (ESI) calcd for  $\text{C}_{20}\text{H}_{20}\text{NO}_6\text{S}_2$   $[\text{M}+\text{H}]^+$  434.0727, found 434.0719.

**Dimethyl 4-((4-nitrophenyl)-sulfonyl)-2-phenyl-3,4-dihydro-2H-1,4-thiazine-5,6-dicarboxylate (3at)**

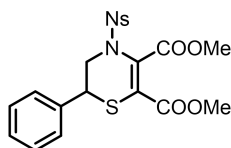

Following the general procedure, the pure title compound was obtained in 88% yield as a yellow solid. m. p. 83-84 °C.  $^1\text{H}$  NMR (600 MHz,  $\text{CDCl}_3$ )  $\delta$  8.39 (d,  $J = 9.0$  Hz, 2H), 8.25 (d,  $J = 8.4$  Hz, 2H), 7.40-7.34 (m, 3H), 7.30-7.25 (m, 2H), 4.27 (dd,  $J = 10.2, 3.0$  Hz, 1H), 4.13 (dd,  $J = 14.4, 3.0$  Hz, 1H), 3.87 (s, 3H), 3.84 (s, 3H), 3.02 (dd,  $J = 14.4, 10.2$  Hz, 1H) ppm.  $^{13}\text{C}$  NMR (151 MHz,  $\text{CDCl}_3$ )  $\delta$  164.3, 163.9, 150.9, 143.9, 135.3, 129.6, 129.43, 129.41, 128.1, 127.7, 126.5, 124.6, 53.5, 53.4, 49.6, 45.4 ppm. HRMS (ESI) calcd for  $\text{C}_{20}\text{H}_{19}\text{N}_2\text{O}_8\text{S}_2$   $[\text{M}+\text{H}]^+$  479.0577, found 479.0563.

**Diethyl 2-phenyl-4-tosyl-3,4-dihydro-2H-1,4-thiazine-5,6-dicarboxylate (3ea)**

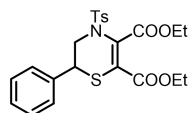

Following the general procedure, the pure title compound was obtained in 84% yield as a white solid. m. p. 89-90 °C.  $^1\text{H}$  NMR (400 MHz,  $\text{CDCl}_3$ )  $\delta$  7.90 (d,  $J = 8.4$  Hz, 2H), 7.40-7.30 (m, 5H), 7.23-7.15 (m, 2H), 4.49-4.38 (m, 1H), 4.36-4.20 (m, 3H), 4.14 (dd,  $J = 14.4, 3.2$  Hz, 1H), 3.91 (dd,  $J = 10.4, 2.8$  Hz, 1H), 2.96 (dd,  $J = 14.4, 10.4$  Hz, 1H), 2.46 (s, 3H), 1.39 (t,  $J = 7.2$  Hz, 3H), 1.33 (t,  $J = 7.2$  Hz, 3H) ppm.  $^{13}\text{C}$  NMR (100 MHz,  $\text{CDCl}_3$ )  $\delta$  164.2, 163.8, 145.2, 135.9, 135.0, 130.2, 129.4, 129.3, 129.1, 128.3, 128.1, 124.0, 62.6, 62.4, 49.4, 44.1, 21.8, 14.1, 13.9 ppm. HRMS (ESI) calcd for  $\text{C}_{23}\text{H}_{26}\text{NO}_6\text{S}_2$   $[\text{M}+\text{H}]^+$  476.1196, found 476.1192.

**Diisopropyl 2-phenyl-4-tosyl-3,4-dihydro-2H-1,4-thiazine-5,6-dicarboxylate (3fa)**

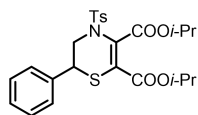

Following the general procedure, the pure title compound was obtained in 83% yield as a white solid. m. p. 79-80 °C. <sup>1</sup>H NMR (400 MHz, CDCl<sub>3</sub>) δ 7.83 (d, *J* = 8.0 Hz, 2H), 7.32-7.21 (m, 5H), 7.17-7.08 (m, 2H), 5.18-5.08 (m, 1H), 5.07-4.97 (m, 1H), 4.02 (dd, *J* = 14.0, 3.2 Hz, 1H), 3.86 (dd, *J* = 10.4, 2.8 Hz, 1H), 2.88 (dd, *J* = 14.4, 10.4 Hz, 1H), 2.38 (s, 3H), 1.35-1.19 (m, 12H) ppm. <sup>13</sup>C NMR (100 MHz, CDCl<sub>3</sub>) δ 163.6, 163.3, 145.1, 136.1, 135.1, 130.2, 129.5, 129.2, 129.0, 128.3, 128.2, 124.3, 70.5, 70.3, 49.3, 44.1, 21.9, 21.8, 21.8, 21.6, 21.3 ppm. HRMS (ESI) calcd for C<sub>25</sub>H<sub>30</sub>NO<sub>6</sub>S<sub>2</sub> [M+H]<sup>+</sup> 504.1509, found 504.1522.

**Di-tert-butyl 2-phenyl-4-tosyl-3,4-dihydro-2H-1,4-thiazine-5,6-dicarboxylate (3ga)**

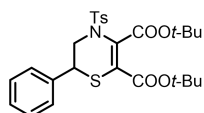

Following the general procedure, the pure title compound was obtained in 70% yield as a white solid. m. p. 151-152 °C. <sup>1</sup>H NMR (400 MHz, CDCl<sub>3</sub>) δ 7.93 (d, *J* = 8.4 Hz, 2H), 7.38-7.30 (m, 5H), 7.26-7.19 (m, 2H), 4.11-3.97 (m, 2H), 2.91 (dd, *J* = 14.0, 10.4 Hz, 1H), 2.44 (s, 3H), 1.59 (s, 9H), 1.53 (s, 9H) ppm. <sup>13</sup>C NMR (100 MHz, CDCl<sub>3</sub>) δ 163.0, 162.6, 144.9, 136.4, 135.4, 130.0 (3C), 129.2, 128.9, 128.4, 128.2, 125.0, 83.3, 83.0, 49.2, 44.6, 28.1, 27.7, 21.8 ppm. HRMS (ESI) calcd for C<sub>27</sub>H<sub>34</sub>NO<sub>6</sub>S<sub>2</sub> [M+H]<sup>+</sup> 532.1822, found 532.1811.

**Dimethyl 3-benzyl-4-tosyl-3,4-dihydro-2H-1,4-thiazine-5,6-dicarboxylate (4au)**

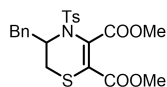

Following the general procedure, the pure title compound was obtained in 75% yield as a white solid. m. p. 130-131 °C. <sup>1</sup>H NMR (400 MHz, CDCl<sub>3</sub>) δ 7.72 (d, *J* = 8.4 Hz, 2H), 7.24 (d, *J* = 8.4 Hz, 2H), 7.21-7.14 (m, 3H), 7.09-7.00 (m, 2H), 4.31-4.17 (m, 1H), 3.89 (s, 3H), 3.86 (s, 3H), 2.74-2.53 (m, 4H), 2.43 (s, 3H) ppm. <sup>13</sup>C NMR (100 MHz, CDCl<sub>3</sub>) δ 164.9, 164.7, 144.9, 136.5, 134.2, 130.0, 129.5, 128.7, 128.2, 127.7,

126.9, 121.9, 53.4, 53.1, 51.2, 37.0, 28.3, 21.8 ppm. HRMS (ESI) calcd for  $C_{22}H_{24}NO_6S_2$   $[M+H]^+$  462.1040, found 462.1031.

**Dimethyl 3-butyl-4-tosyl-3,4-dihydro-2H-1,4-thiazine-5,6-dicarboxylate (4av)**

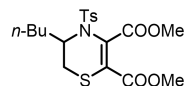

Following the general procedure, the pure title compound was obtained in 49% yield as a white solid. m. p. 132-134 °C  $^1H$  NMR (400 MHz,  $CDCl_3$ )  $\delta$  7.82 (d,  $J = 8.4$  Hz, 2H), 7.35 (d,  $J = 8.4$  Hz, 2H), 4.10-4.02 (m, 1H), 3.87 (s, 3H), 3.80 (s, 3H), 2.70-2.58 (m, 2H), 2.45 (s, 3H), 1.45-1.08 (m, 6H), 0.78 (t,  $J = 7.2$  Hz, 3H) ppm.  $^{13}C$  NMR (100 MHz,  $CDCl_3$ )  $\delta$  164.8 (2C), 145.1, 134.6, 130.1, 128.3, 127.4, 122.4, 53.3, 53.1, 49.5, 30.4, 29.5, 27.4, 22.2, 21.8, 13.9 ppm. HRMS (ESI) calcd for  $C_{19}H_{26}NO_6S_2$   $[M+H]^+$  428.1196, found 428.1192.

**Dimethyl 3-isobutyl-4-tosyl-3,4-dihydro-2H-1,4-thiazine-5,6-dicarboxylate (4aw)**

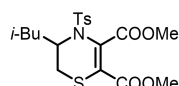

Following the general procedure, the pure title compound was obtained in 41% yield as a white solid. m. p. 114-115 °C  $^1H$  NMR (400 MHz,  $CDCl_3$ )  $\delta$  7.83 (d,  $J = 8.4$  Hz, 2H), 7.35 (d,  $J = 8.0$  Hz, 2H), 4.19-4.09 (m, 1H), 3.87 (s, 3H), 3.81 (s, 3H), 2.65-2.59 (m, 2H), 2.45 (s, 3H), 1.72-1.58 (m, 2H), 1.12-1.03 (m, 1H), 0.81 (d,  $J = 7.2$  Hz, 3H), 0.75 (d,  $J = 6.8$  Hz, 3H) ppm.  $^{13}C$  NMR (100 MHz,  $CDCl_3$ )  $\delta$  164.9, 164.8, 145.1, 134.6, 130.2, 128.3, 127.5, 122.7, 53.3, 53.1, 47.6, 39.9, 29.6, 24.1, 22.9, 22.2, 21.8 ppm. HRMS (ESI) calcd for  $C_{19}H_{26}NO_6S_2$   $[M+H]^+$  428.1196, found 428.1190.

**Diethyl 3-benzyl-4-tosyl-3,4-dihydro-2H-1,4-thiazine-5,6-dicarboxylate (4eu)**

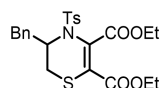

Following the general procedure, the pure title compound was obtained in 82% yield as a white solid. m. p. 99-100 °C.  $^1H$  NMR (400 MHz,  $CDCl_3$ )  $\delta$  7.73 (d,  $J = 8.4$  Hz, 2H), 7.22 (d,  $J = 8.2$  Hz, 2H), 7.19-7.14 (m, 3H), 7.09-6.98 (m, 2H), 4.46-4.36 (m, 1H), 4.35-4.18 (m, 4H), 2.80-2.72 (m, 1H), 2.70-2.62 (m, 2H), 2.61-2.54 (m, 1H),

2.42 (s, 3H), 1.44-1.28 (m, 6H) ppm.  $^{13}\text{C}$  NMR (100 MHz,  $\text{CDCl}_3$ )  $\delta$  164.5, 164.2, 144.8, 136.6, 134.3, 130.0, 129.5, 128.6, 128.2, 127.5, 126.9, 122.4, 62.6, 62.3, 51.2, 37.0, 28.5, 21.8, 14.1, 13.9 ppm. HRMS (ESI) calcd for  $\text{C}_{24}\text{H}_{28}\text{NO}_6\text{S}_2$   $[\text{M}+\text{H}]^+$  490.1353, found 490.1371.

**Dimethyl 3-methyl-2-phenyl-4-tosyl-3,4-dihydro-2H-1,4-thiazine-5,6-dicarboxylate (3ax)**

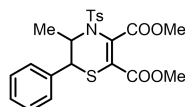

Following the general procedure, the pure title compound was obtained in 50% yield as colorless oil.  $^1\text{H}$  NMR (400 MHz,  $\text{CDCl}_3$ )  $\delta$  7.94 (d,  $J = 8.4$  Hz, 2H), 7.39 (d,  $J = 8.0$  Hz, 2H), 7.35-7.29 (m, 3H), 7.25-7.21 (m, 2H), 4.17-4.11 (m, 1H), 4.05 (d,  $J = 3.2$  Hz, 1H), 3.89 (s, 3H), 3.85 (s, 3H), 2.45 (s, 3H), 0.87 (d,  $J = 6.4$  Hz, 3H) ppm.  $^{13}\text{C}$  NMR (100 MHz,  $\text{CDCl}_3$ )  $\delta$  164.8, 164.5, 145.2, 135.5, 134.8, 130.2, 129.0, 128.7, 128.34, 128.30, 127.4, 121.8, 53.3, 53.2, 51.6, 47.8, 21.8, 12.0 ppm. HRMS (ESI) calcd for  $\text{C}_{22}\text{H}_{24}\text{NO}_6\text{S}_2$   $[\text{M}+\text{H}]^+$  462.1040, found 462.1043.

**2.2 General Procedure for the Synthesis of Sulfoxides**

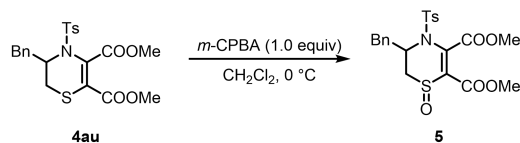

*m*-CPBA (0.20 mmol, 1.0 equiv.) was added to the solution of 3,4-dihydro-1,4-thiazine **4au** (0.20 mmol) in DCM (2.0 mL) at 0 °C. Then the mixture was stirred at room temperature until the complete consumption of **4au** as monitored by TLC. The reaction mixture was purified by column chromatography on silica gel (*n*-hexane/ethyl acetate = 2:1), affording the corresponding sulfoxide **5** (99% yield, dr = 2:1). The major isomer: white solid, m. p. 173-174 °C.  $^1\text{H}$  NMR (400 MHz,  $\text{CDCl}_3$ )  $\delta$  7.90 (d,  $J = 8.4$  Hz, 2H), 7.38 (d,  $J = 8.4$  Hz, 2H), 7.35-7.27 (m, 3H), 7.22-7.17 (m, 2H), 4.44-4.34 (m, 1H), 3.40 (s, 3H), 3.88 (s, 3H), 3.21-3.08 (m, 2H), 3.01-2.89 (m, 1H), 2.63 (dd,  $J = 3.6, 13.2$  Hz, 1H), 2.45 (s, 3H) ppm.  $^{13}\text{C}$  NMR (100 MHz,  $\text{CDCl}_3$ )  $\delta$  163.0, 162.9, 146.3, 142.7, 135.1, 134.1, 130.6, 129.4, 129.3, 128.1, 127.8, 116.8, 55.7, 54.0, 53.3, 48.0, 37.0, 21.9 ppm. HRMS (ESI) calcd for

$C_{22}H_{24}NO_7S_2$   $[M+H]^+$  478.0989, found: 478.0978. The minor isomer: colorless oil.  $^1H$  NMR (400 MHz,  $CDCl_3$ )  $\delta$  7.76 (d,  $J = 8.4$  Hz, 2H), 7.28 (d,  $J = 8.4$  Hz, 2H), 7.19-7.12 (m, 3H), 7.08-7.02 (m, 2H), 4.66-4.56 (m, 1H), 3.97 (s, 3H), 3.95 (s, 3H), 3.40 (dd,  $J = 2.8, 14.8$  Hz, 1H), 3.33 (dd,  $J = 8.8, 13.6$  Hz, 1H), 2.80-2.66 (m, 2H), 2.45 (s, 3H) ppm.  $^{13}C$  NMR (100 MHz,  $CDCl_3$ )  $\delta$  163.9, 163.7, 146.2, 138.3, 136.3, 133.5, 130.4, 129.9, 128.7, 128.4, 126.9, 121.7, 53.9, 53.5, 52.7, 50.2, 34.0, 21.9 ppm. HRMS (ESI) calcd for  $C_{22}H_{24}NO_7S_2$   $[M+H]^+$  478.0989, found: 478.0978.

### 2.3 General Procedure for the Synthesis of Sulfones

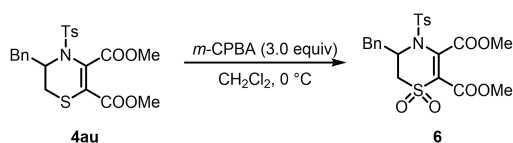

*m*-CPBA (0.60 mmol, 3.0 equiv.) was added to the solution of 3,4-dihydro-1,4-thiazine **4au** (0.20 mmol) in DCM (2.0 mL) at 0 °C. Then the mixture was stirred at room temperature. After the complete consumption of **4au** as monitored by TLC, the mixture was diluted with DCM and washed with saturated aqueous solution of  $NaHSO_3$ . Then the aqueous layer was extracted with DCM three times. The combined organic layers were washed with saturated brine solution and dried over anhydrous  $Na_2SO_4$ . After the evaporation of solvent, the residue was purified by column chromatography on silica gel (*n*-hexane/ethyl acetate = 2/1), affording the corresponding sulfone **6** as a white solid (97% yield). m. p. 81-82 °C.  $^1H$  NMR (400 MHz,  $CDCl_3$ )  $\delta$  7.84 (d,  $J = 8.4$  Hz, 2H), 7.37 (d,  $J = 8.0$  Hz, 2H), 7.28-7.20 (m, 3H), 7.14-7.09 (m, 2H), 4.56-4.48 (m, 1H), 3.97 (s, 3H), 3.93 (s, 3H), 2.40 (dd,  $J = 10.0, 13.6$  Hz, 1H), 3.24-3.19 (m, 2H), 2.86 (dd,  $J = 5.6, 13.6$  Hz, 1H), 2.47 (s, 3H) ppm.  $^{13}C$  NMR (100 MHz,  $CDCl_3$ )  $\delta$  162.4, 160.9, 146.8, 142.7, 135.2, 133.4, 130.7, 129.7, 129.0, 128.3, 127.5, 118.0, 58.4, 54.2, 53.6, 52.7, 35.1, 21.9 ppm. HRMS (ESI) calcd for  $C_{22}H_{24}NO_8S_2$   $[M+H]^+$  494.0938, found: 494.0931.

### 3. References

[1] (a) Cheng, B.; Li, Y.; Wang, T.; Zhang, X.; Li, H.; Li, Y.; Zhai, H. *Chem. Commun.*, **2019**, 55, 14606-14608; (b) Huynh, T. N. T.; Retailleau, P.; Denhez, C.; Nguyenb, K. P. P.; Guillaumea, D. *Org. Biomol. Chem.*, **2014**, 12, 5098-5101.

[2] (a) Steiman, T. J.; Liu, J.; Mengiste, A. et al. Synthesis of  $\beta$ -Phenethylamines via Ni/Photoredox Cross-Electrophile Coupling of Aliphatic Aziridines and Aryl Iodides. *J. Am. Chem. Soc.*, **2020**, 142, 7598-7605; (b) Das, B. K.; Pradhan, S.; Punniyamurthy, T. Stereospecific Ring Opening and Cycloisomerization of Aziridines with Propargylamines: Synthesis of Functionalized Piperazines and Tetrahydropyrazines. *Org. Lett.*, **2018**, 20, 4444-4448; (c) Thakur, V. V.; Sudalai, A. N-Bromoamides as versatile catalysts for aziridination of olefins using chloramine-T. *Tetrahedron Lett.*, **2003**, 44, 989-992.



## 4. Copies of NMR Spectra

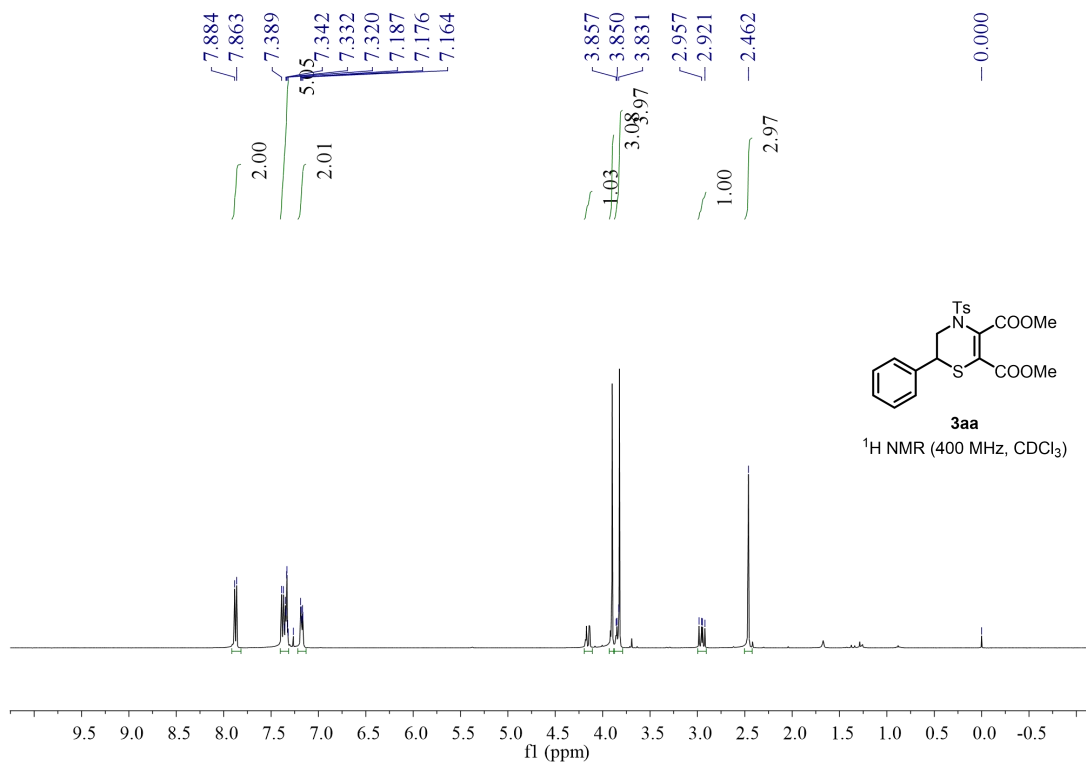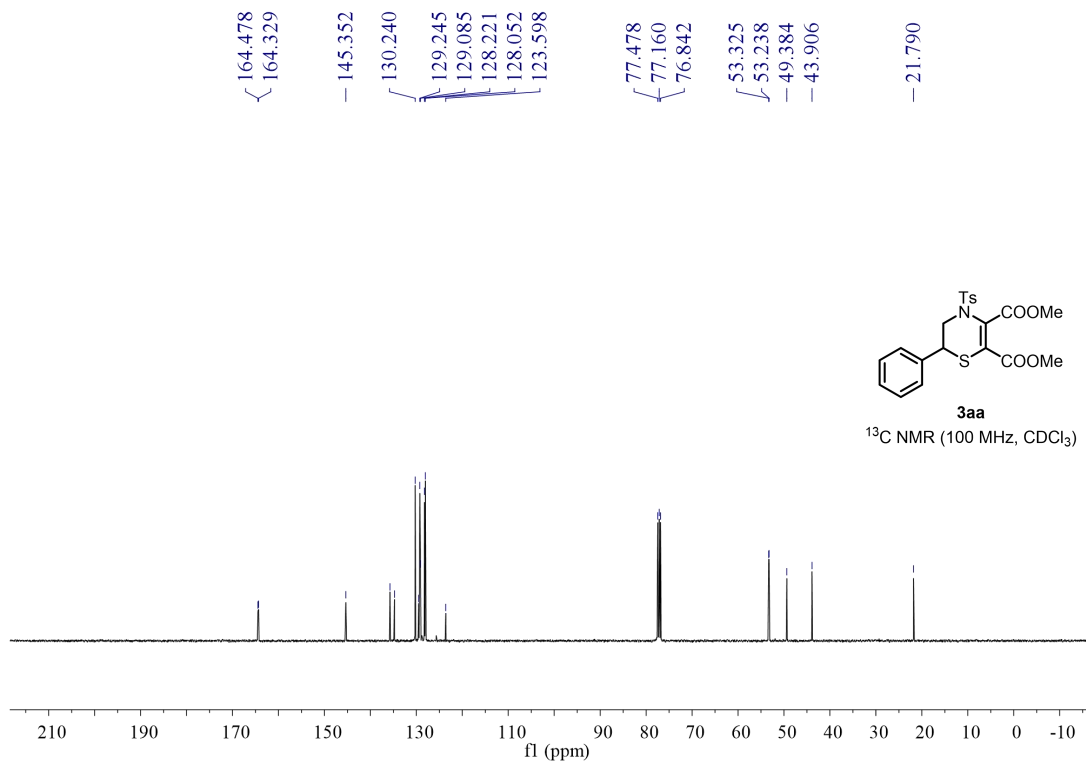

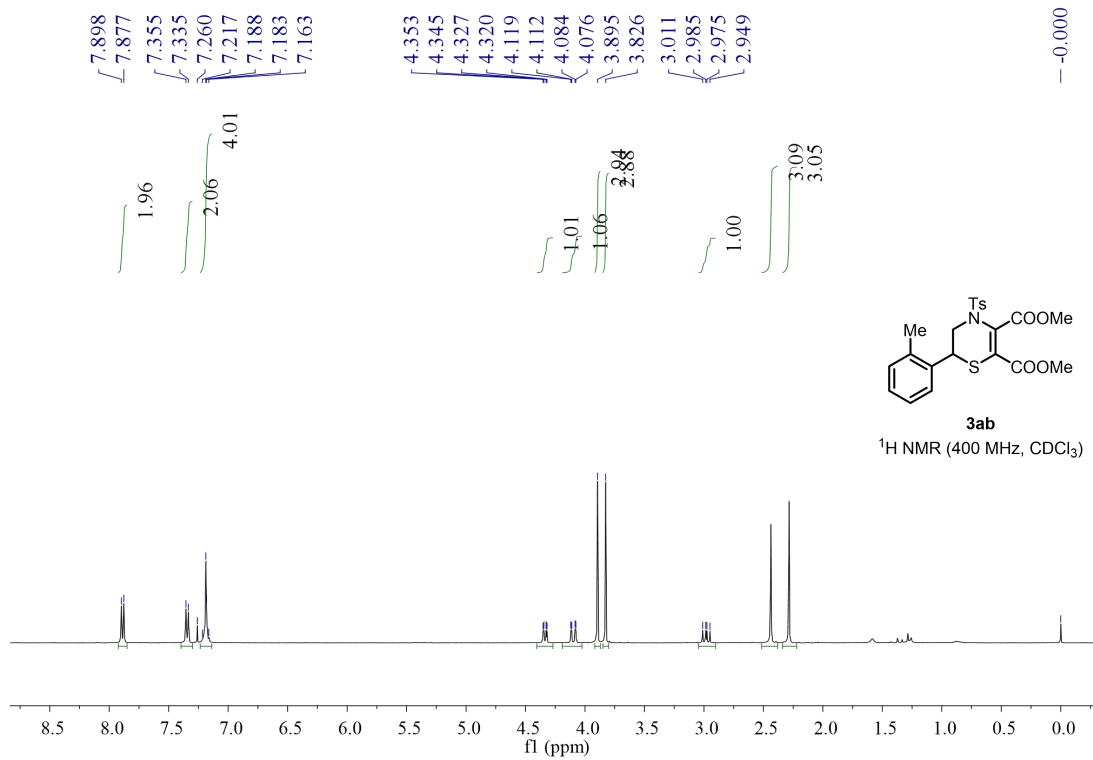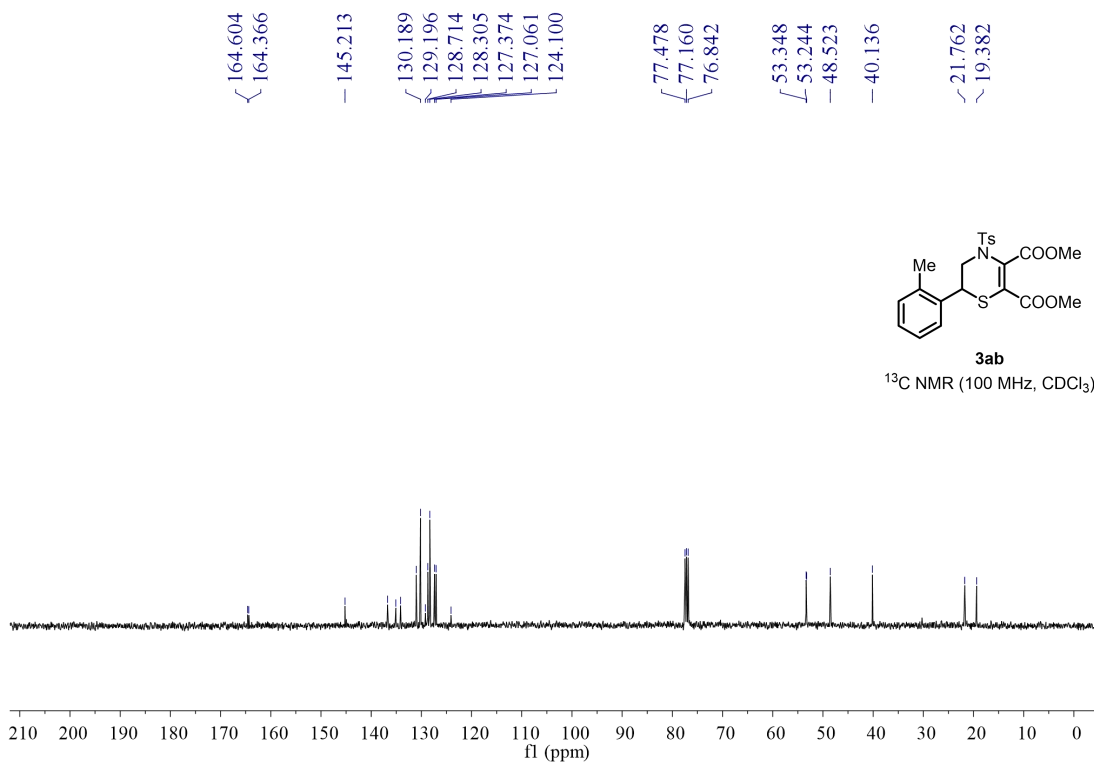

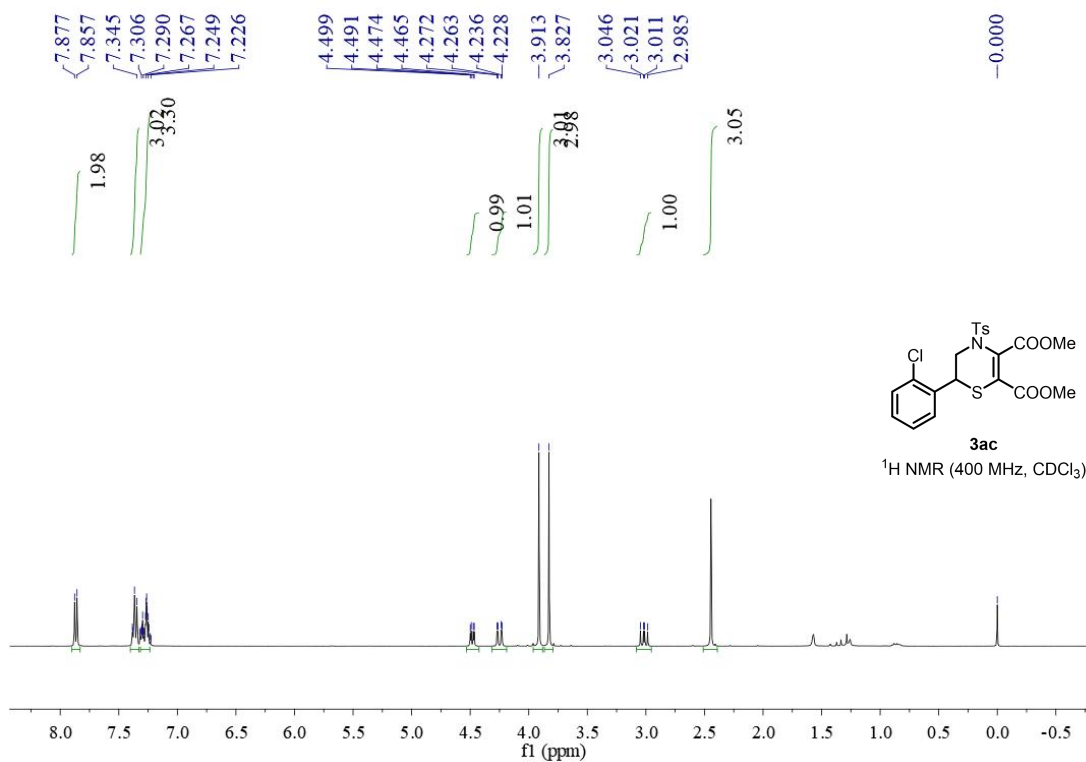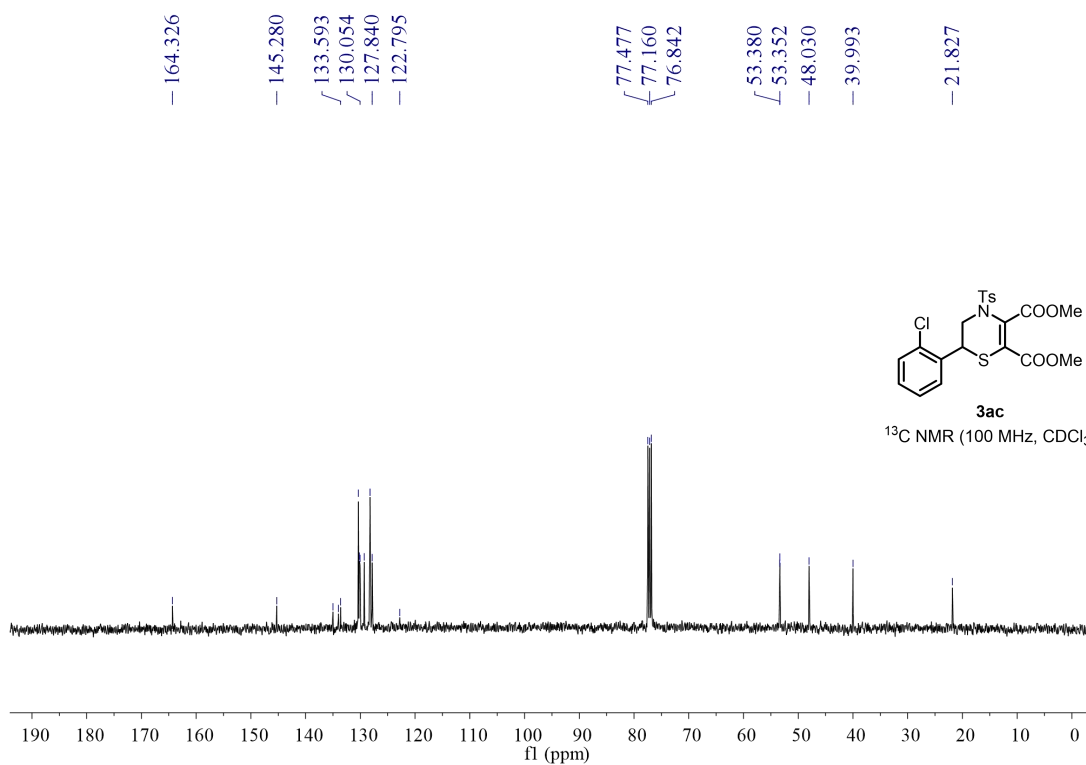

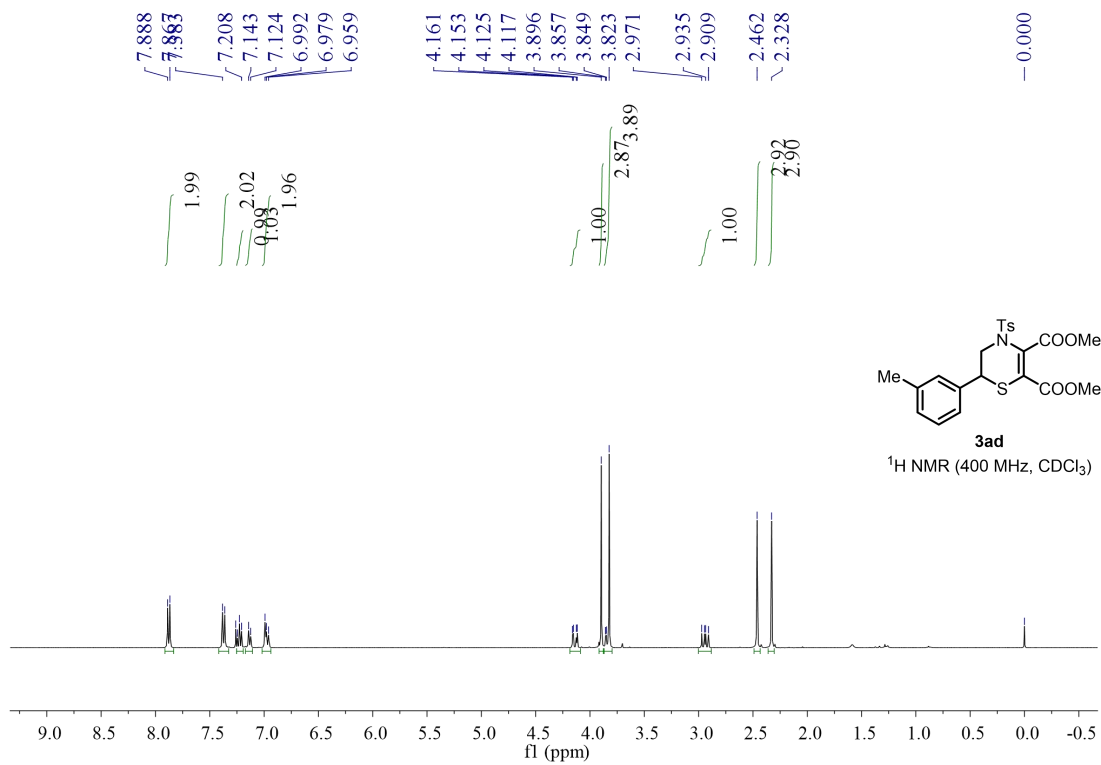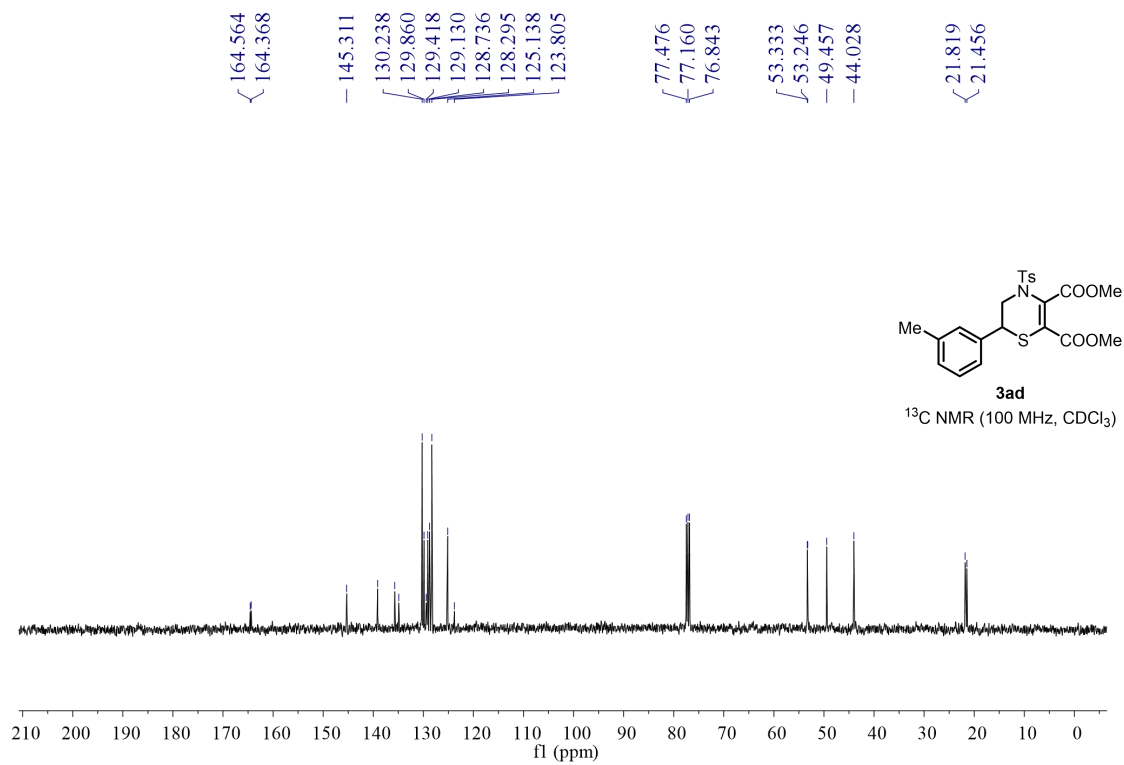

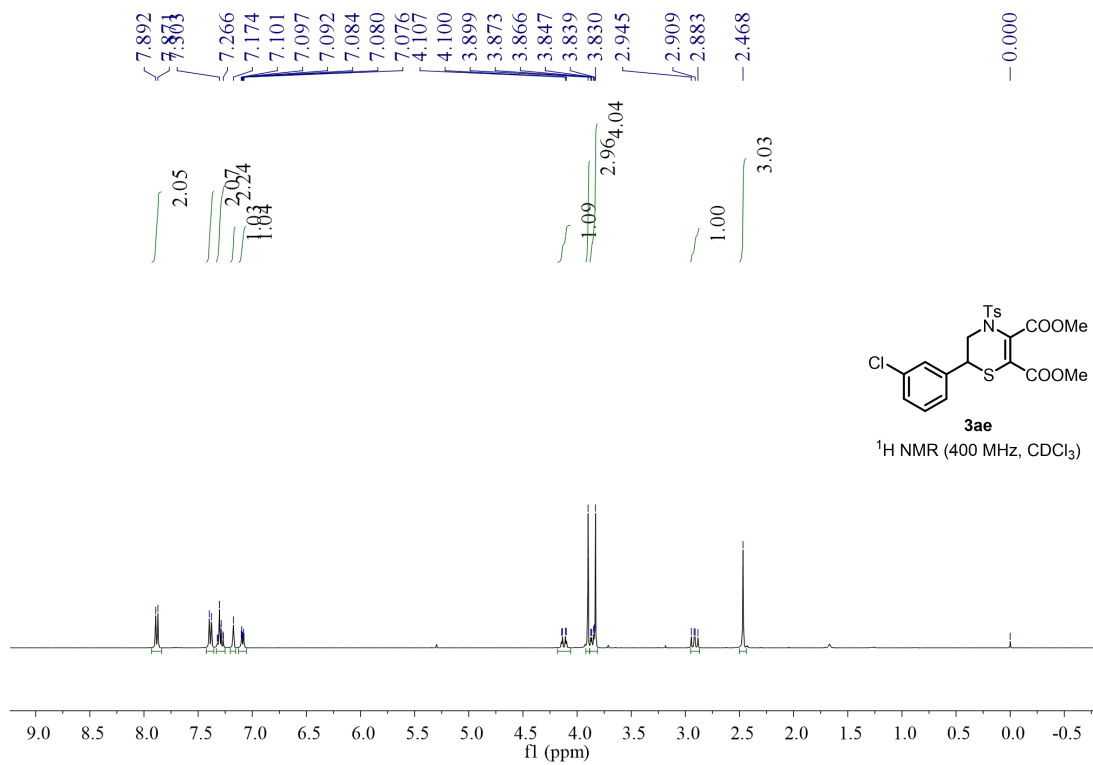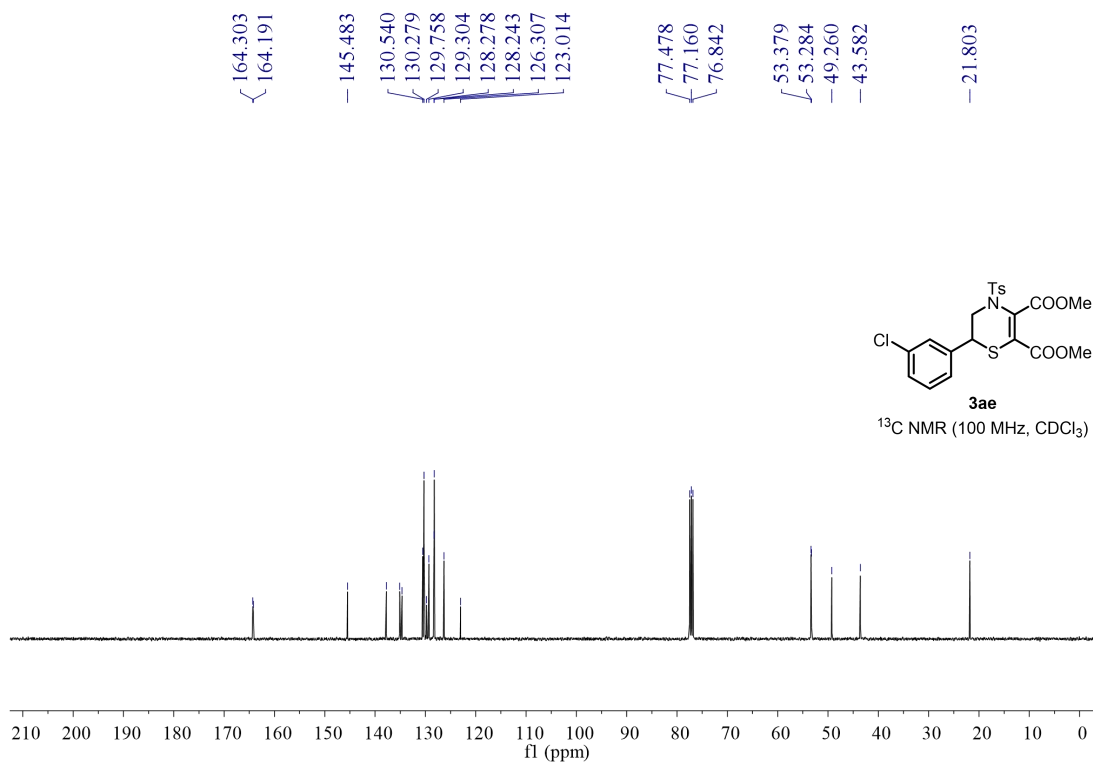

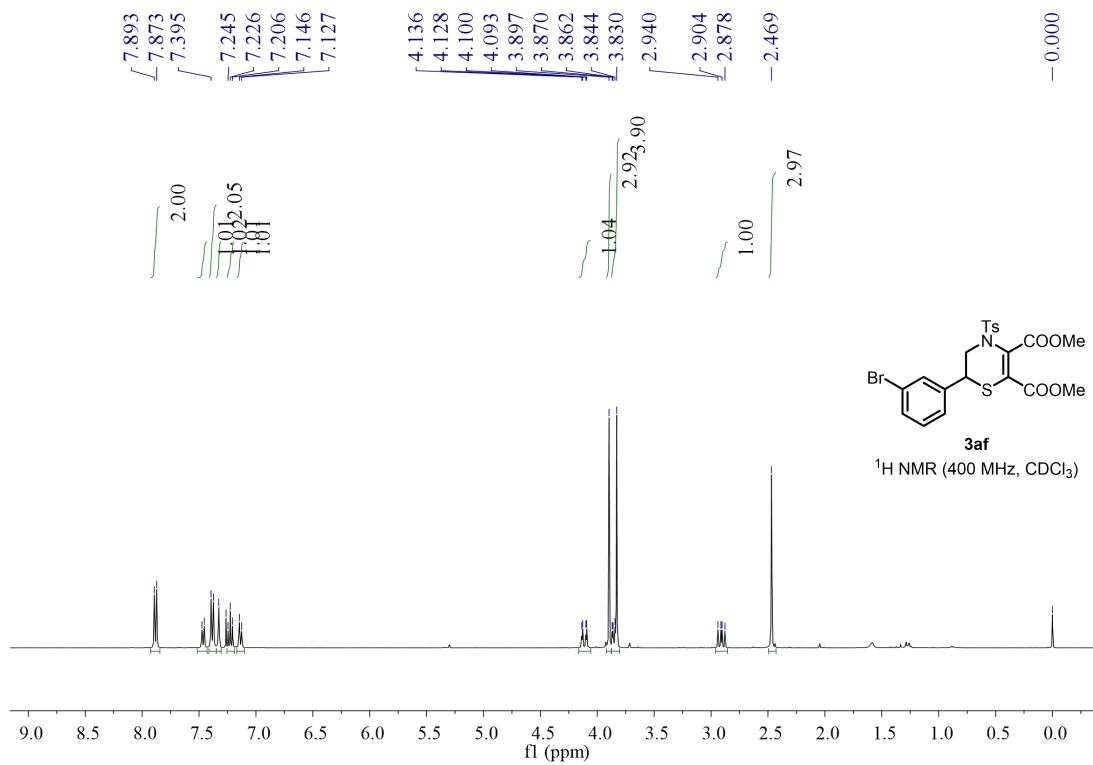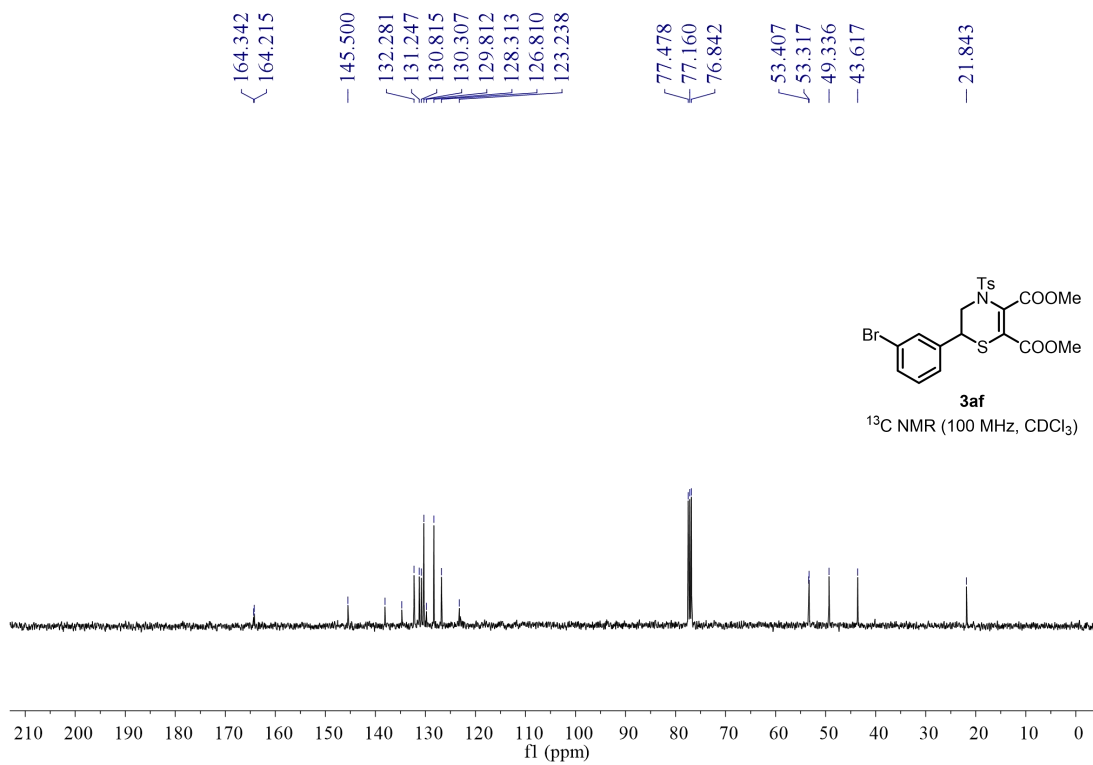

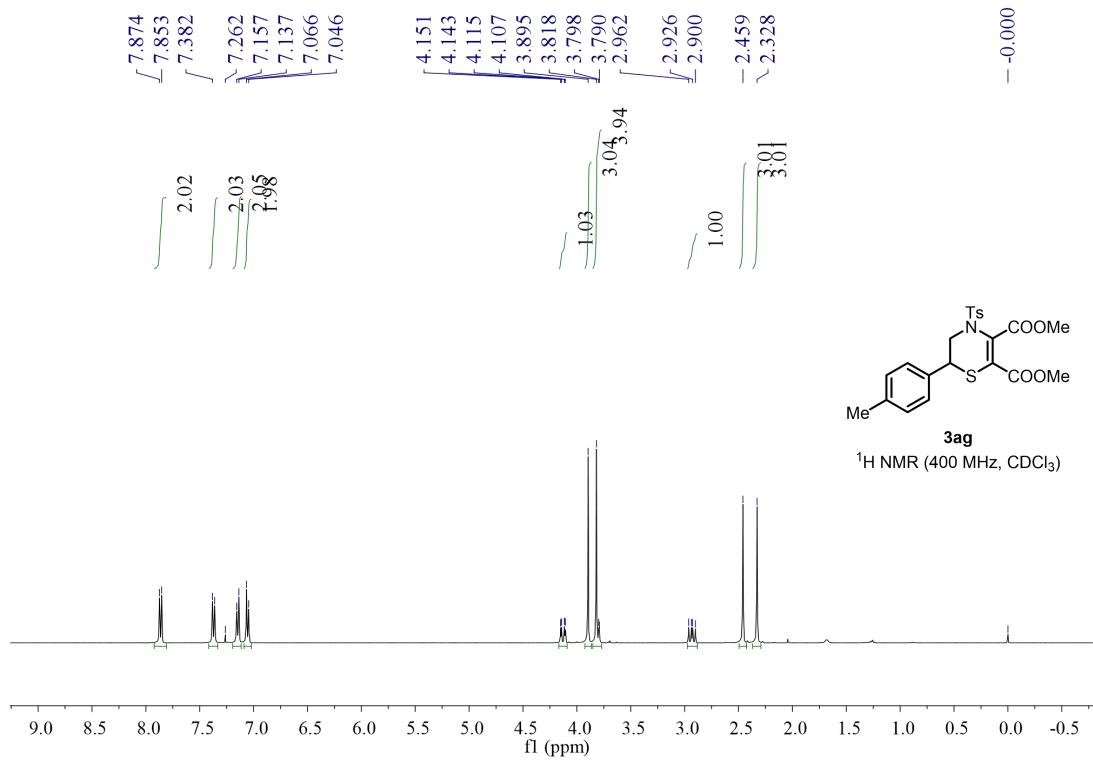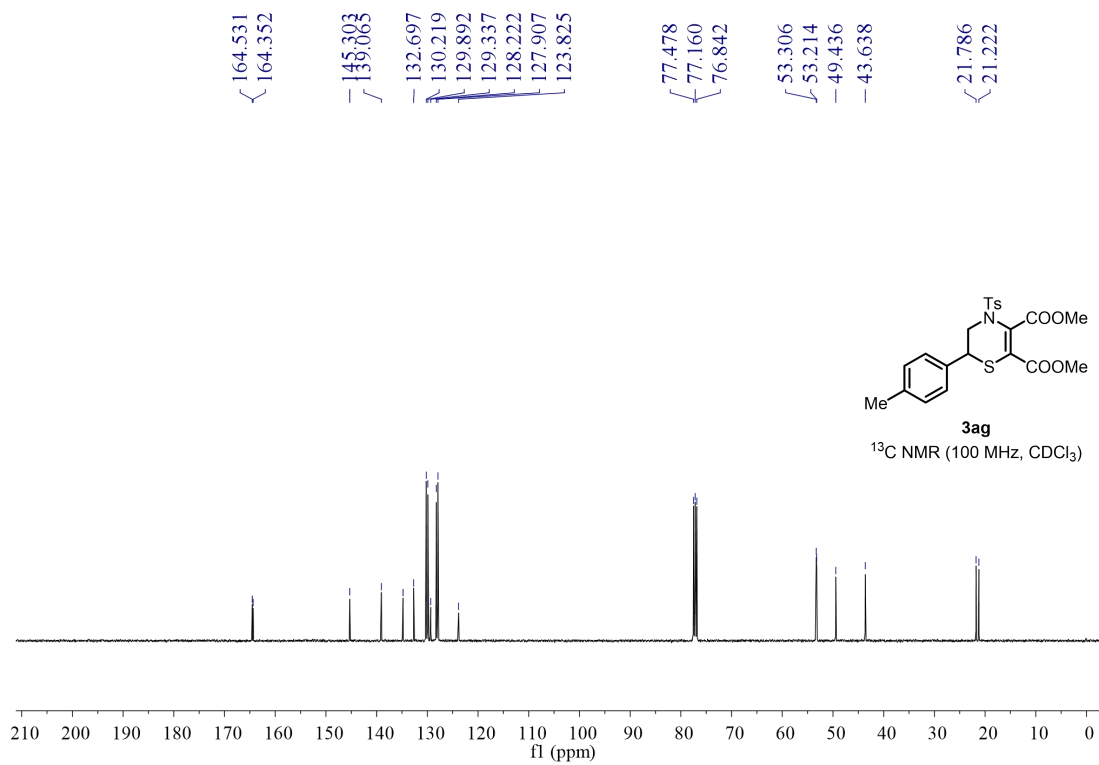

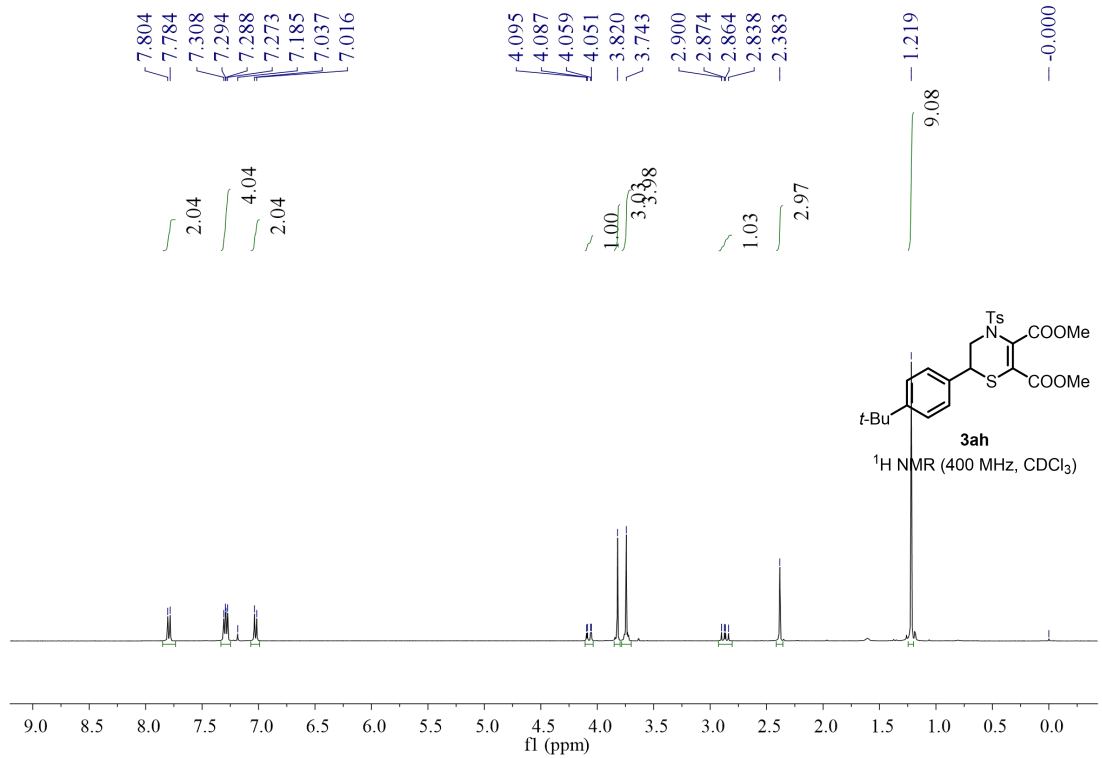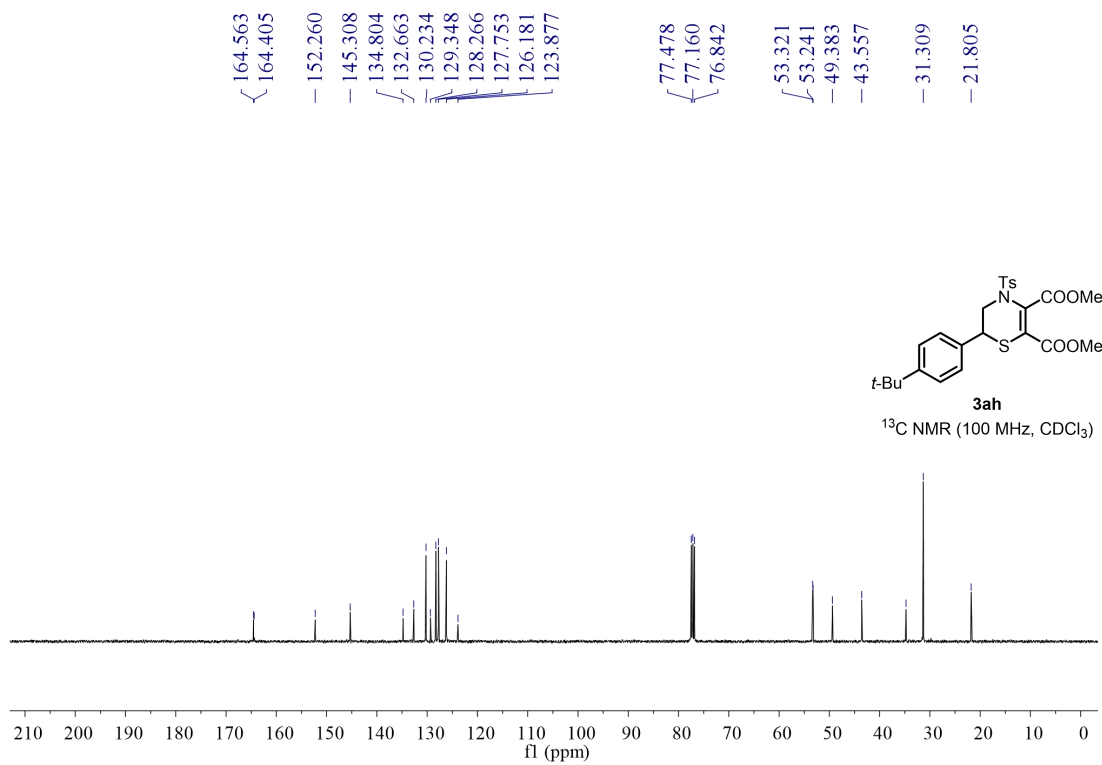



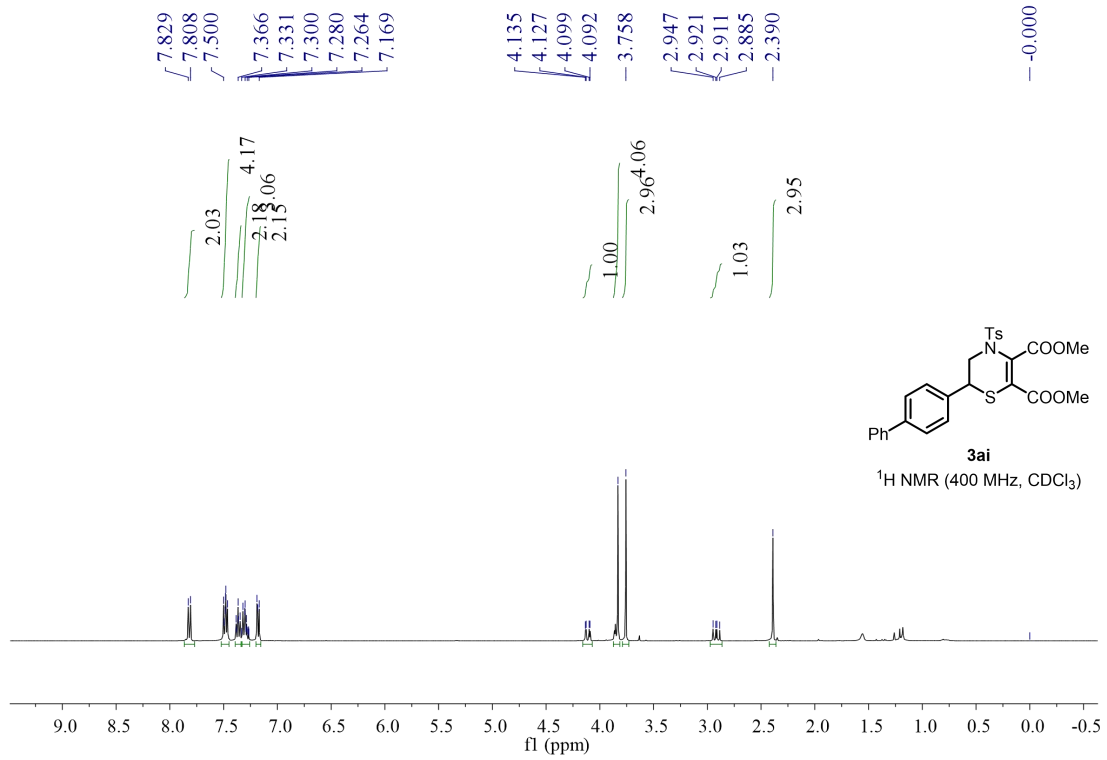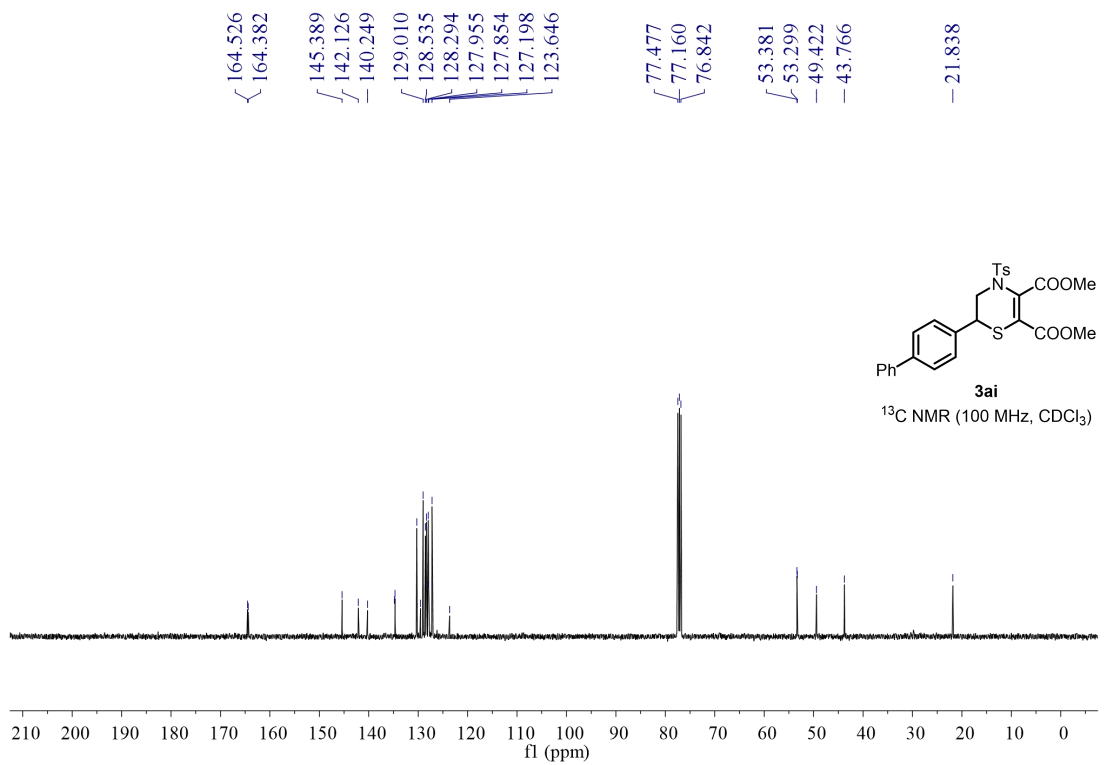

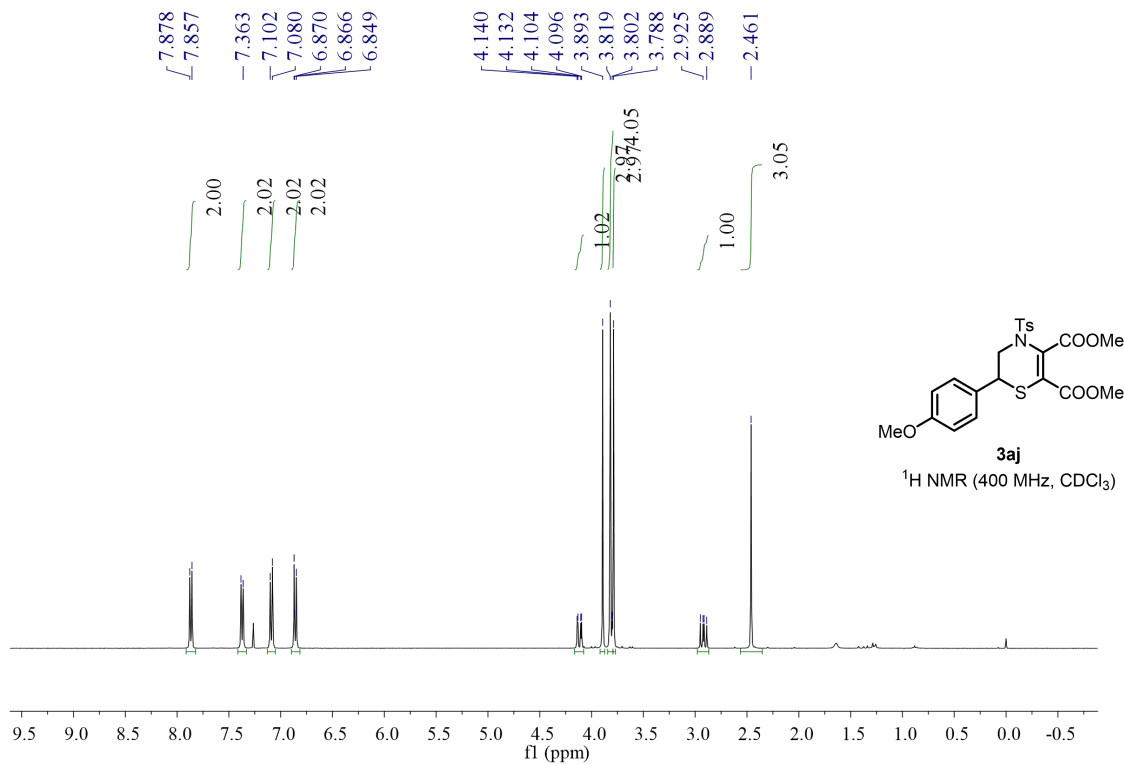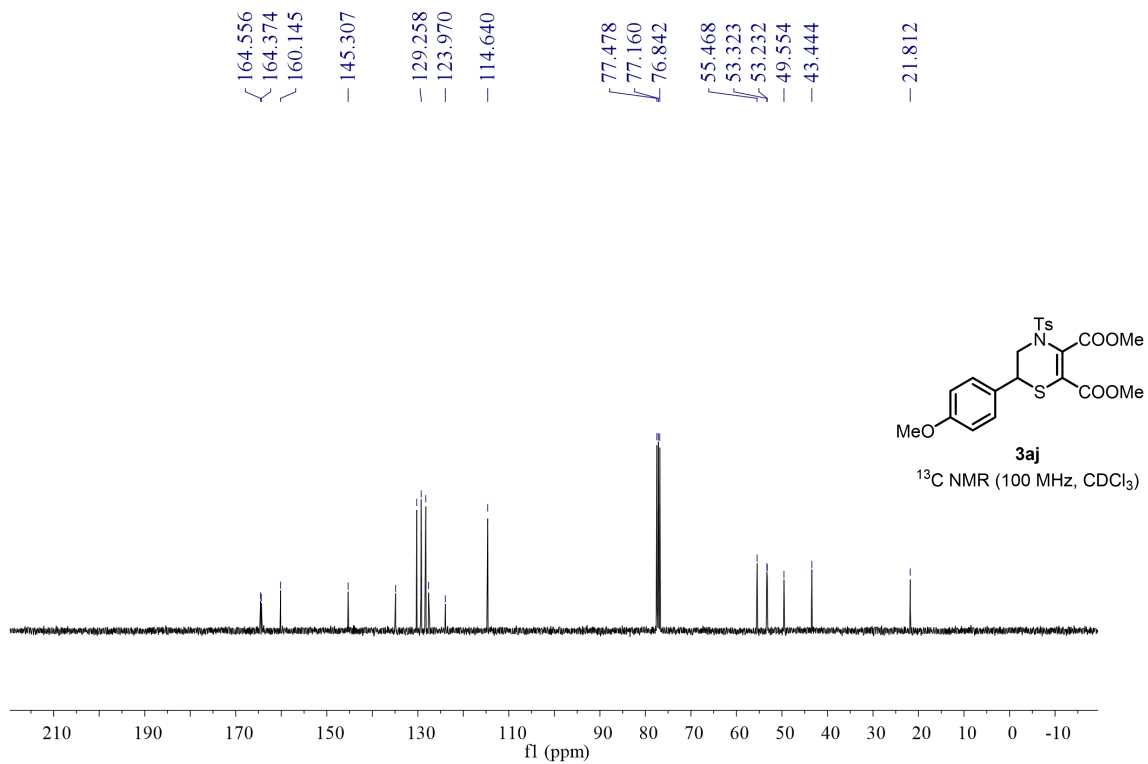

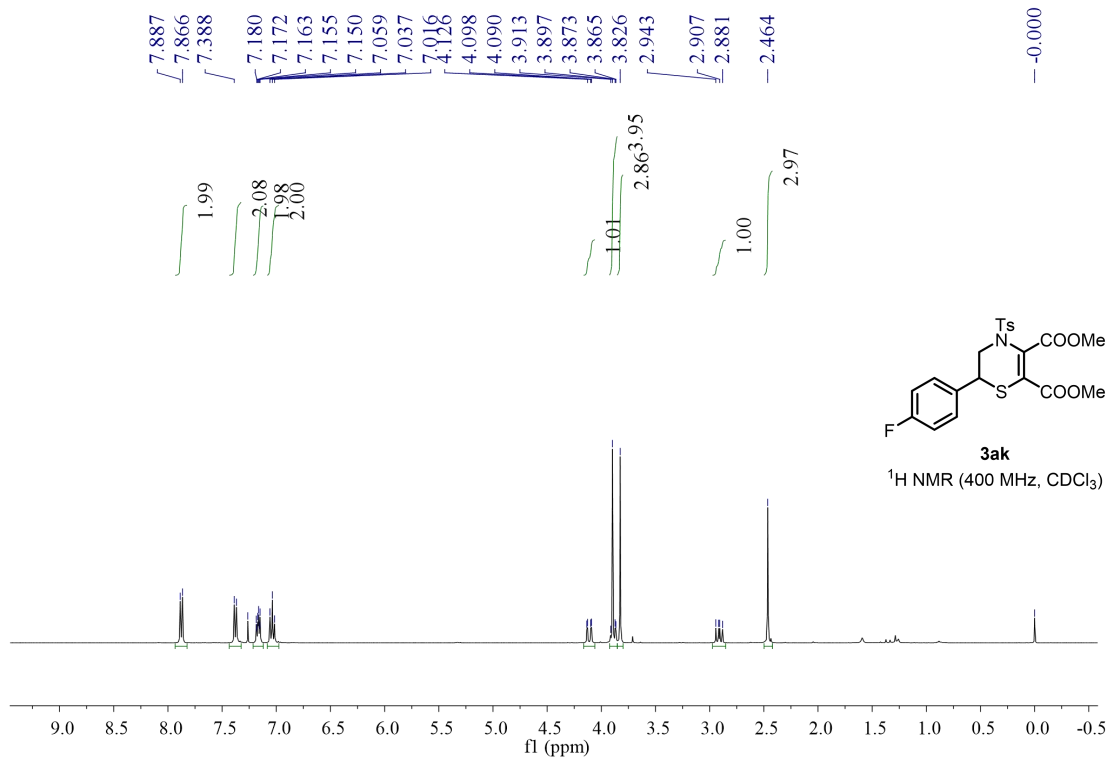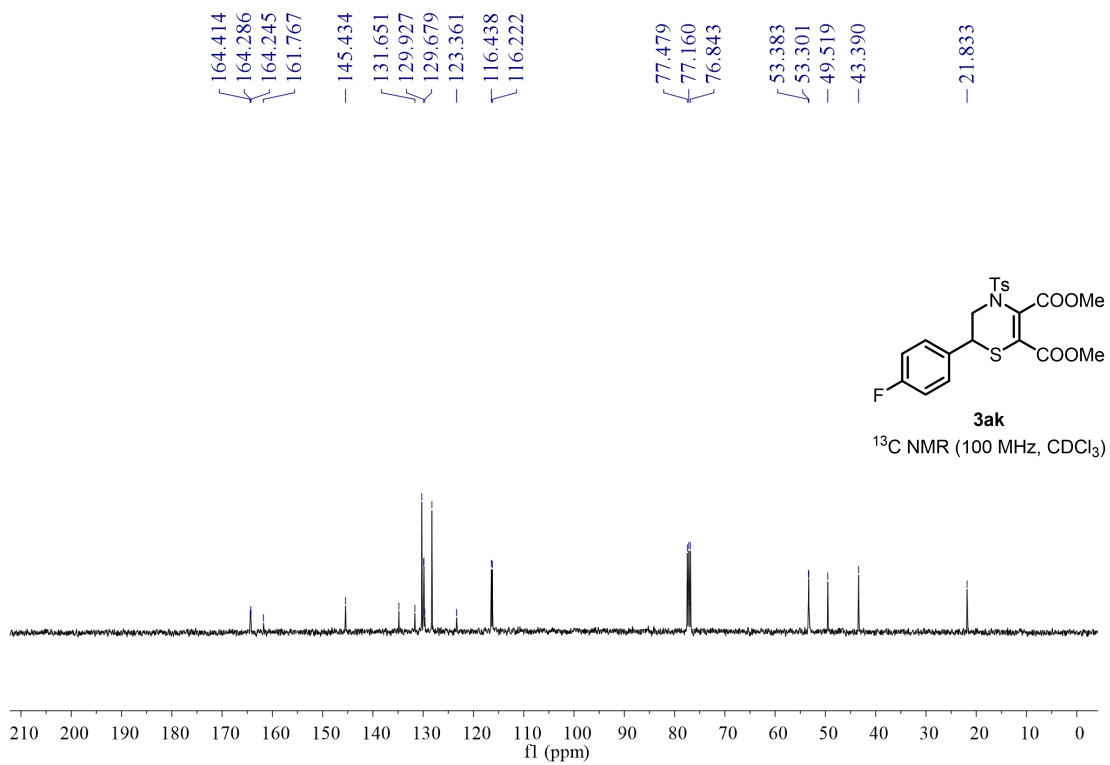

-112.037

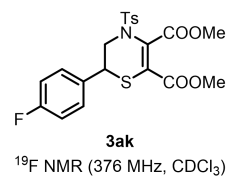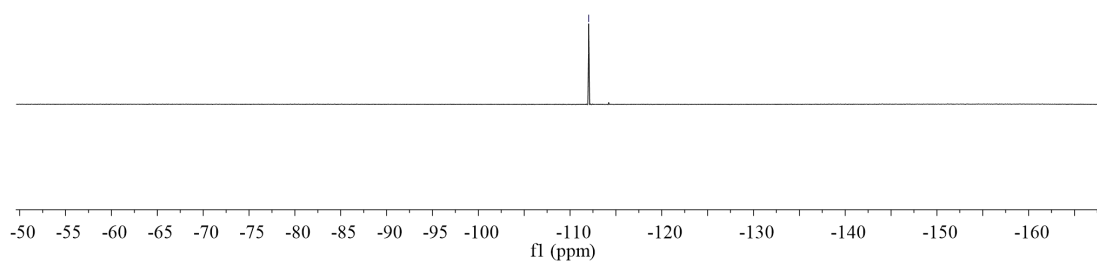

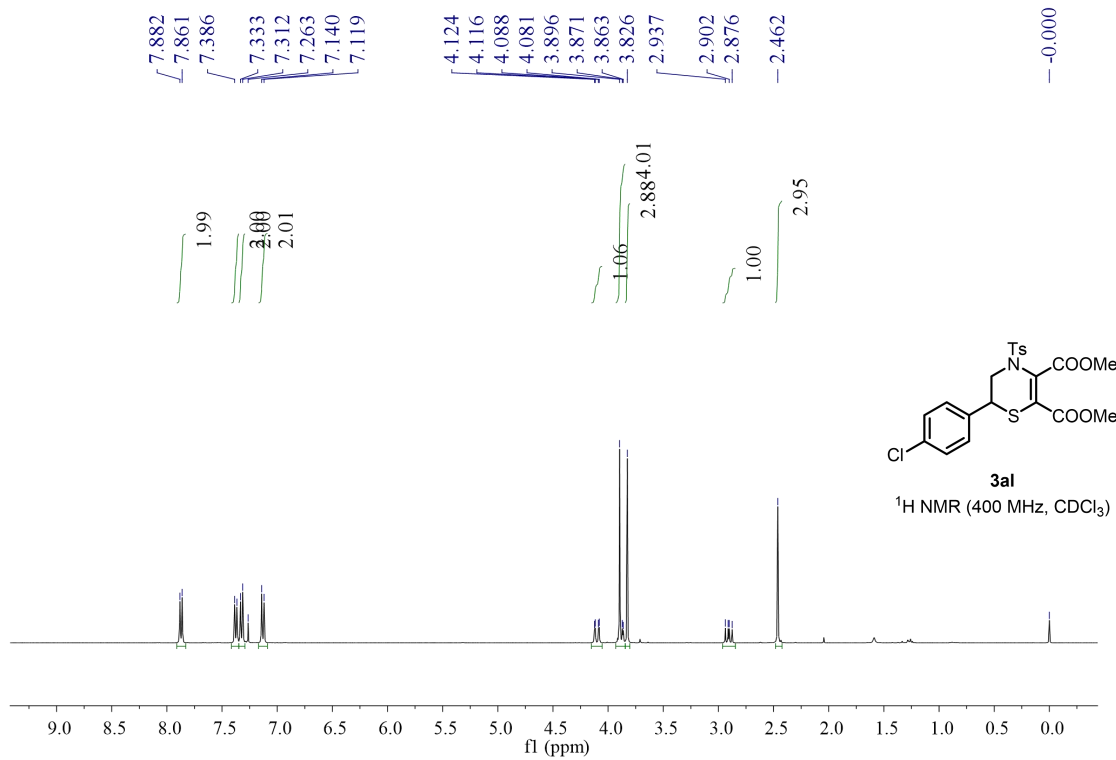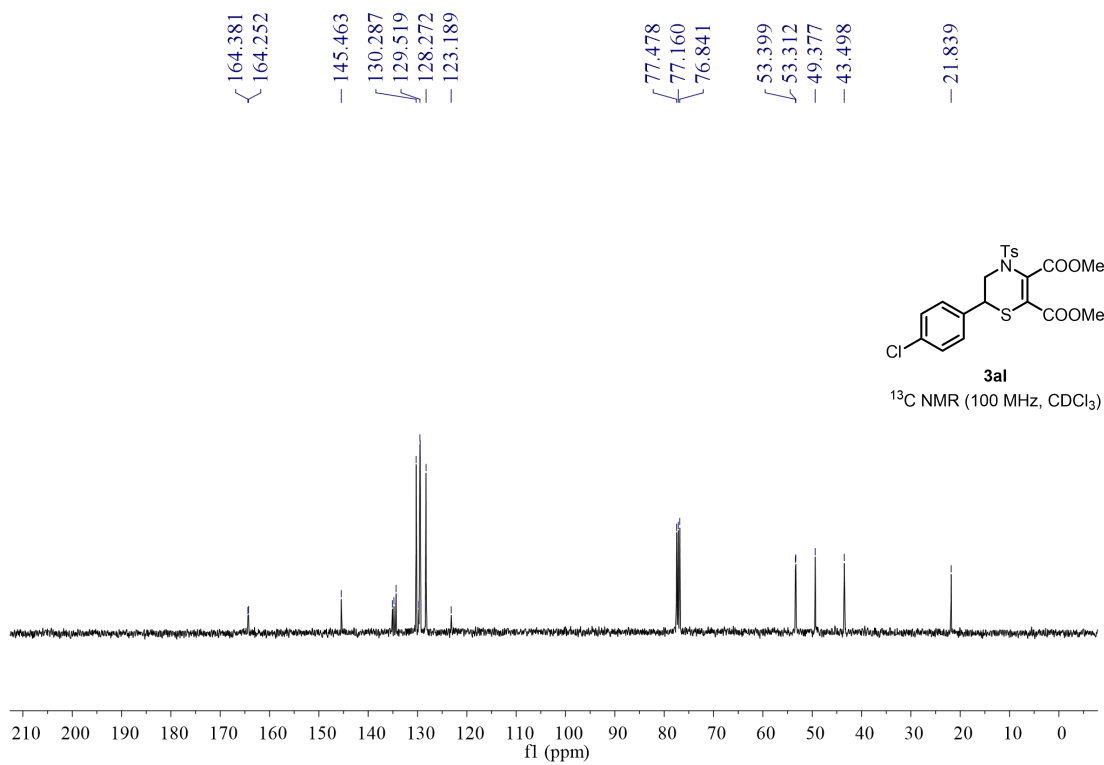

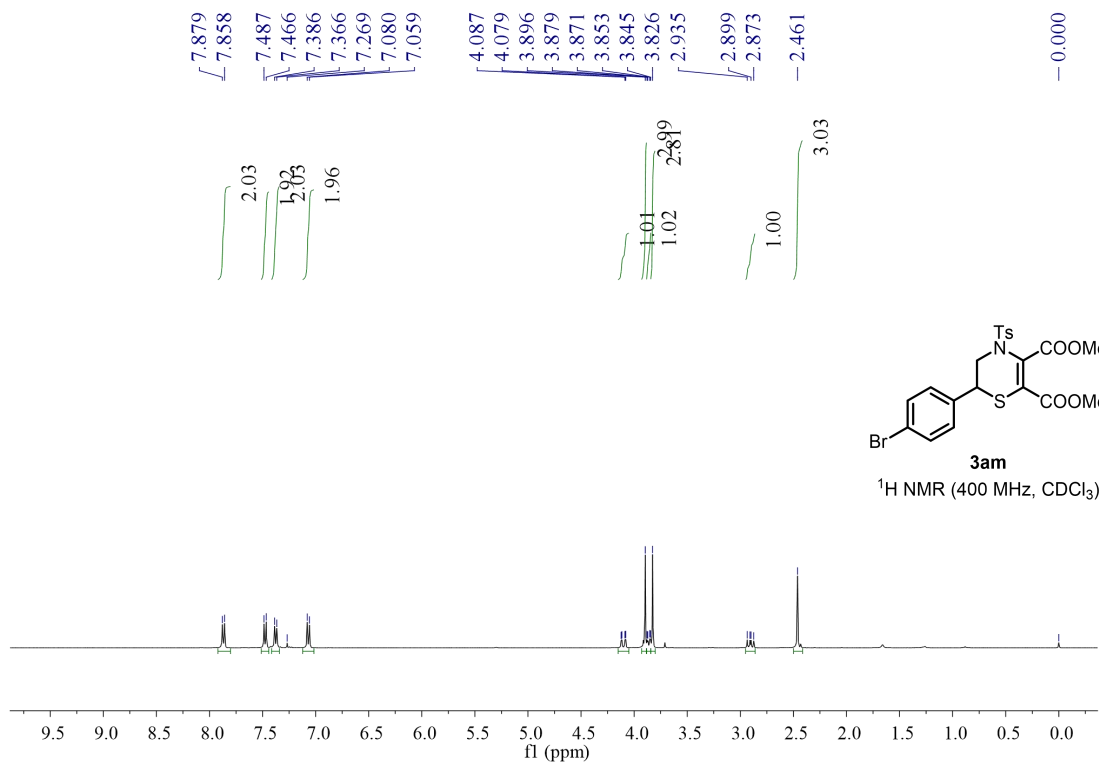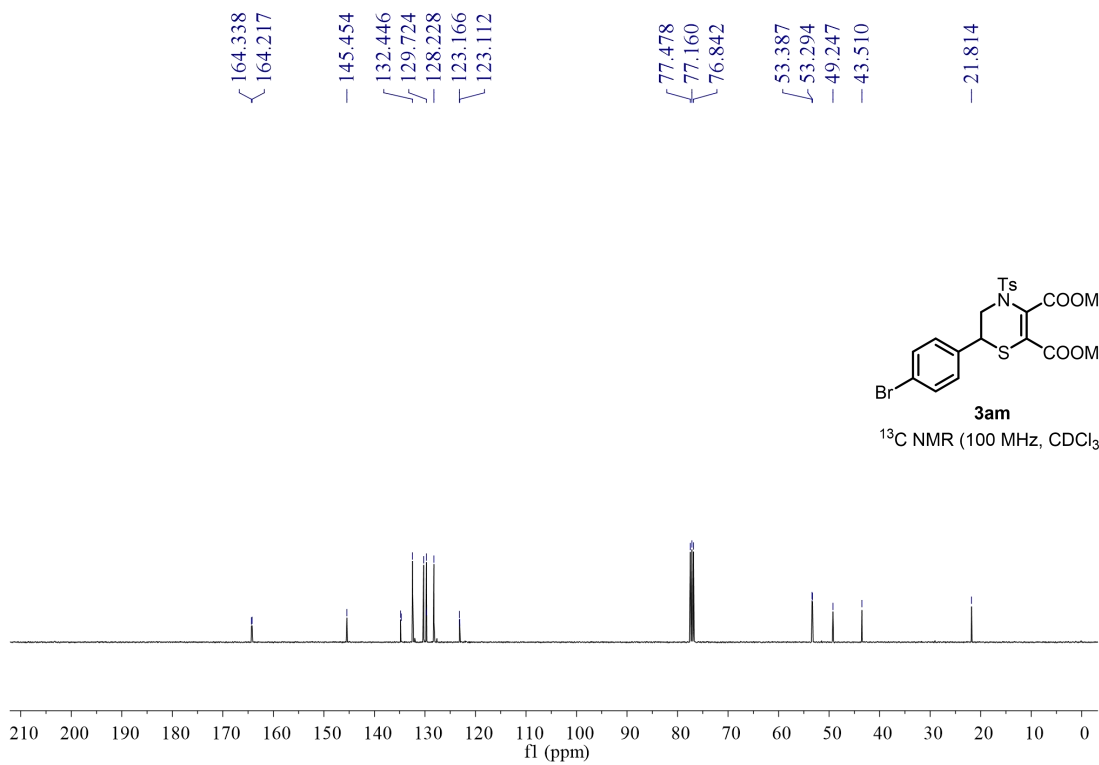

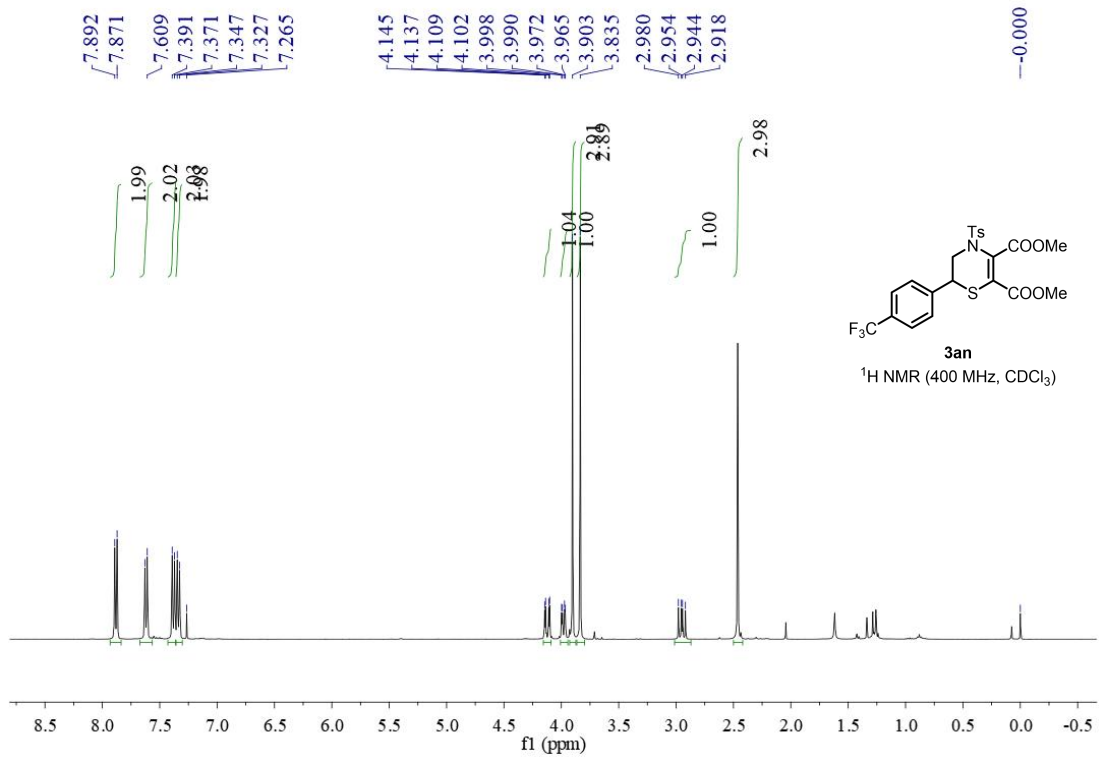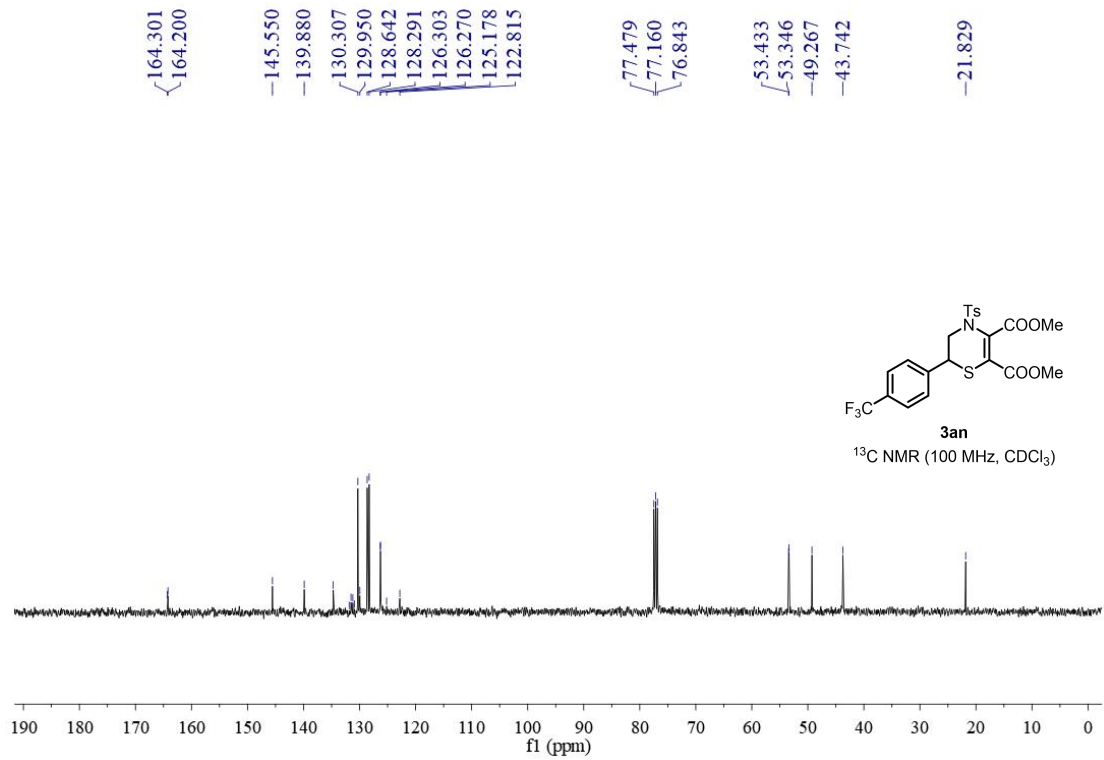

--62.812

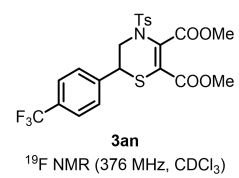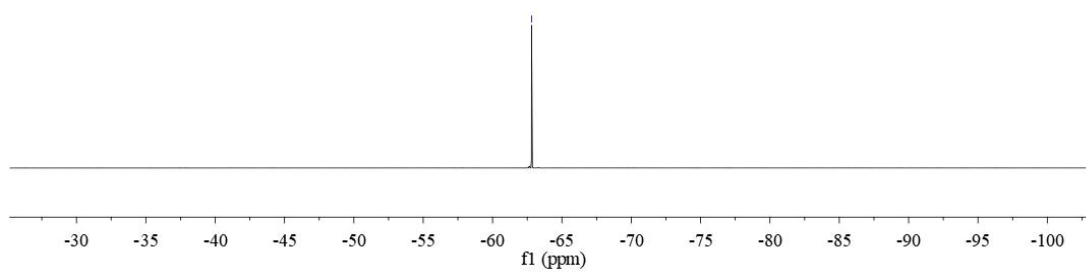



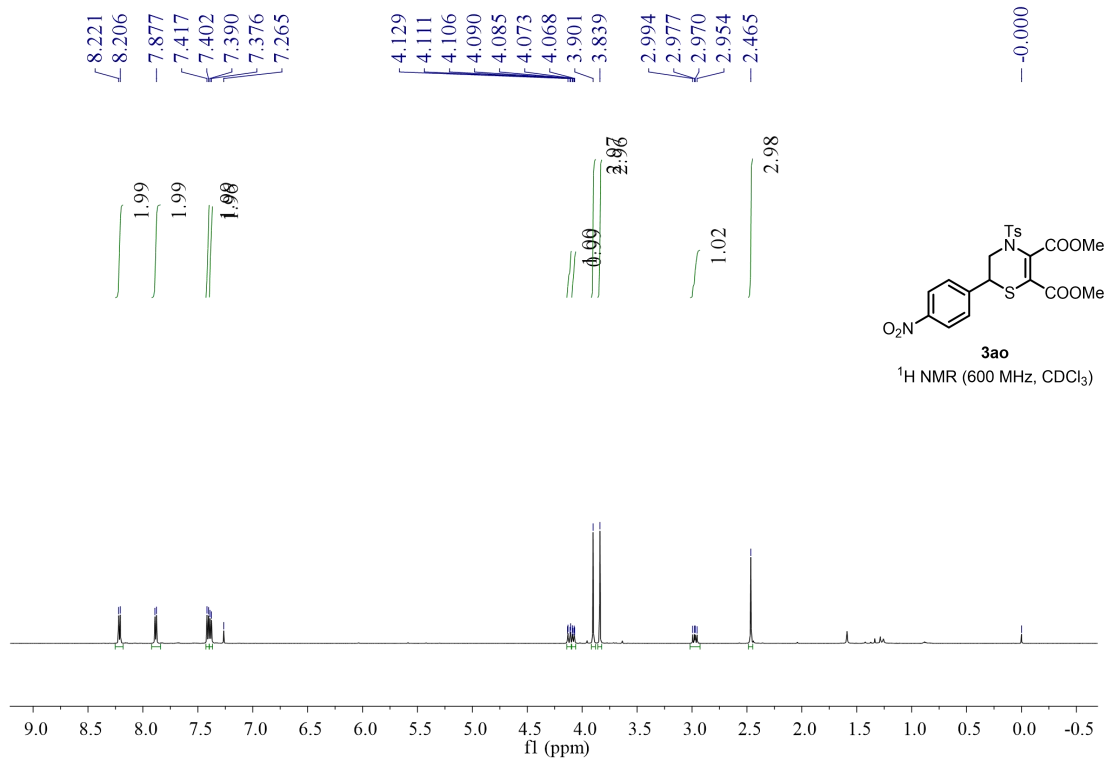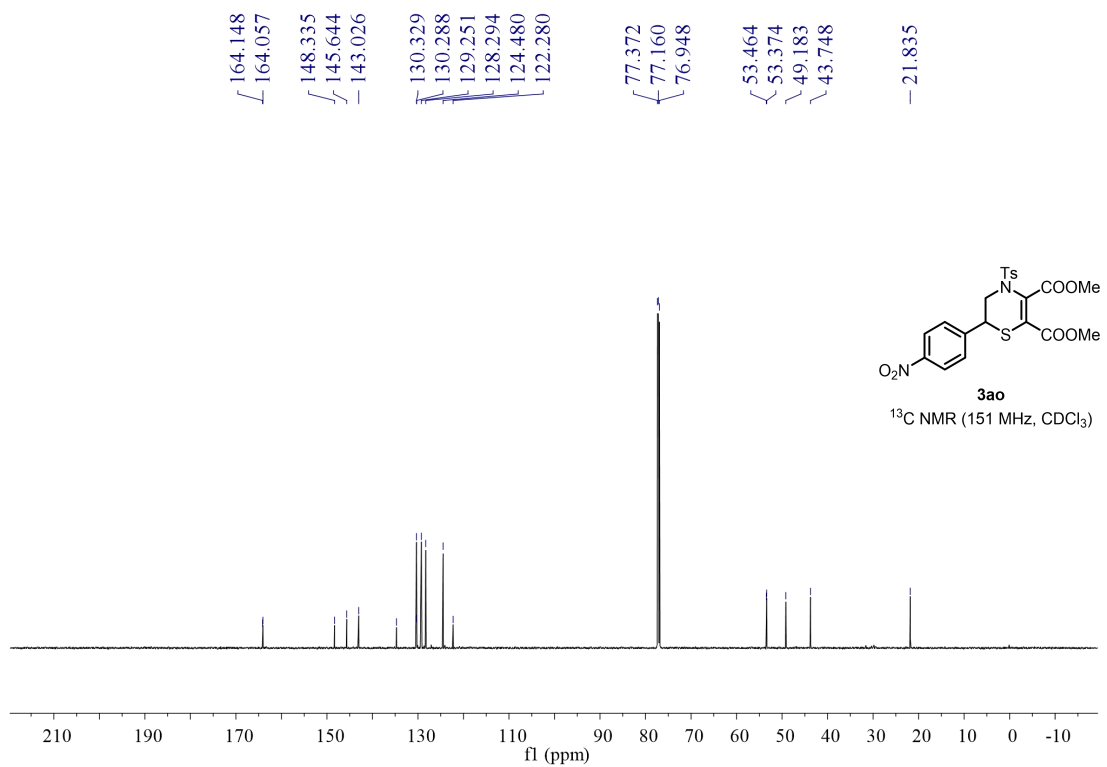

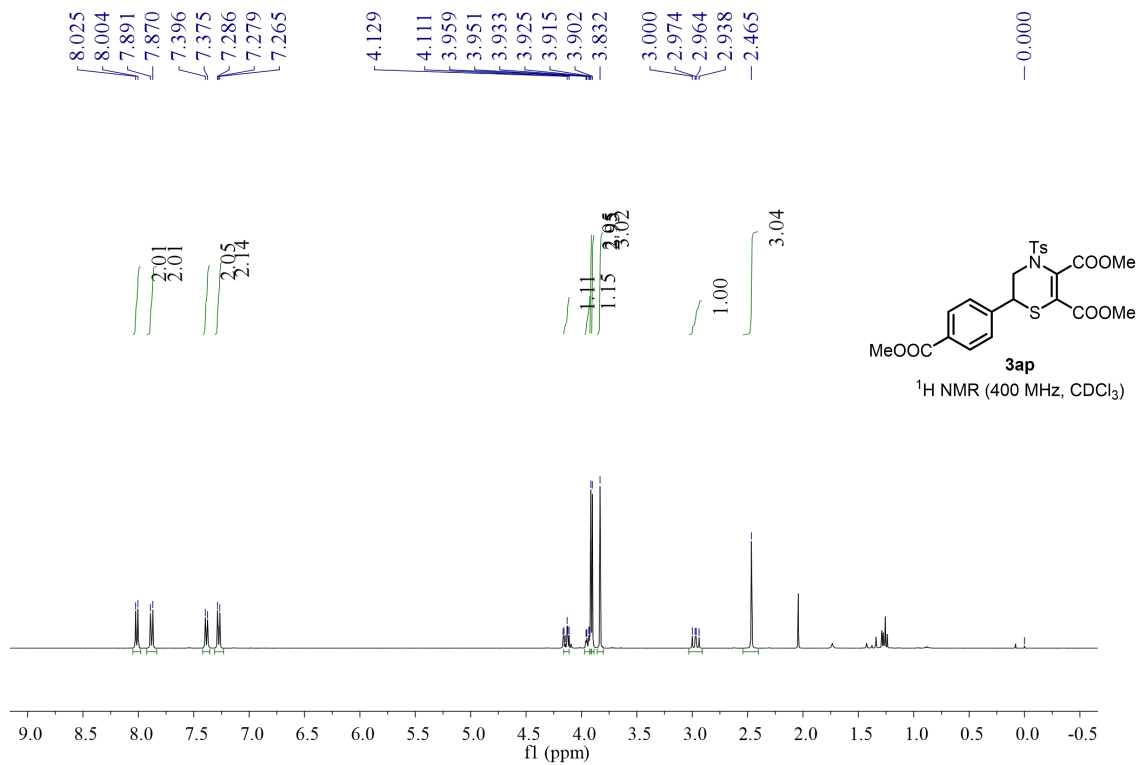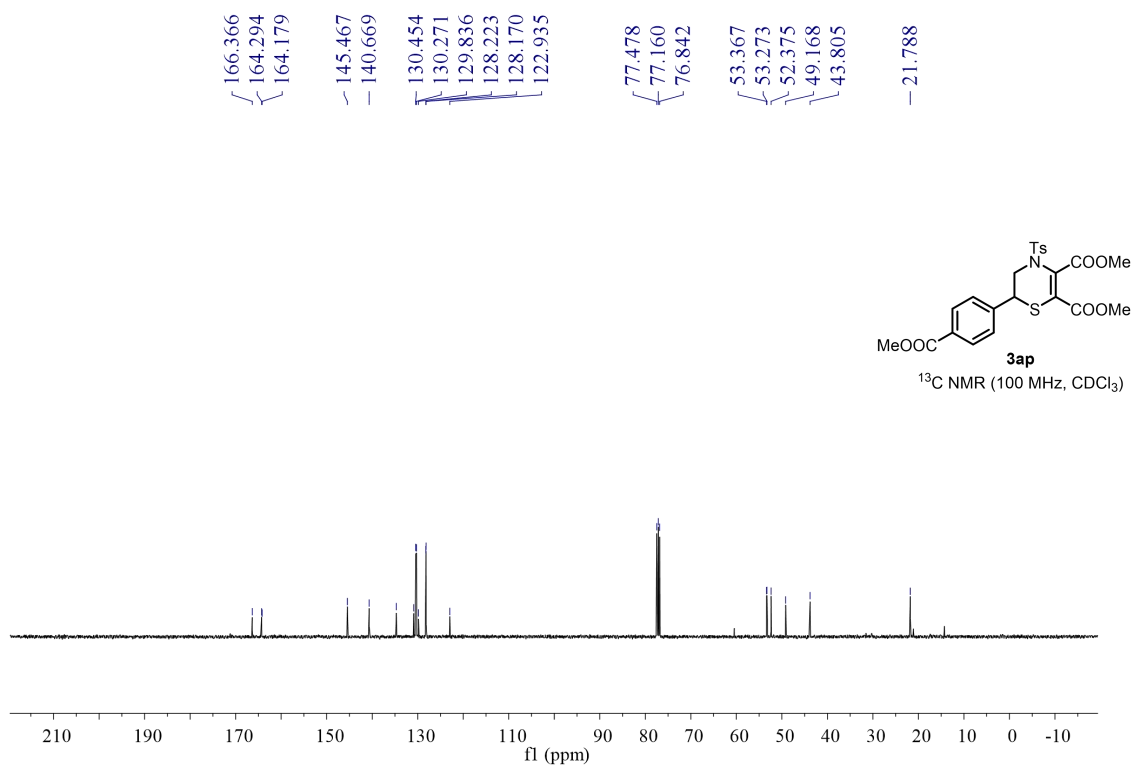

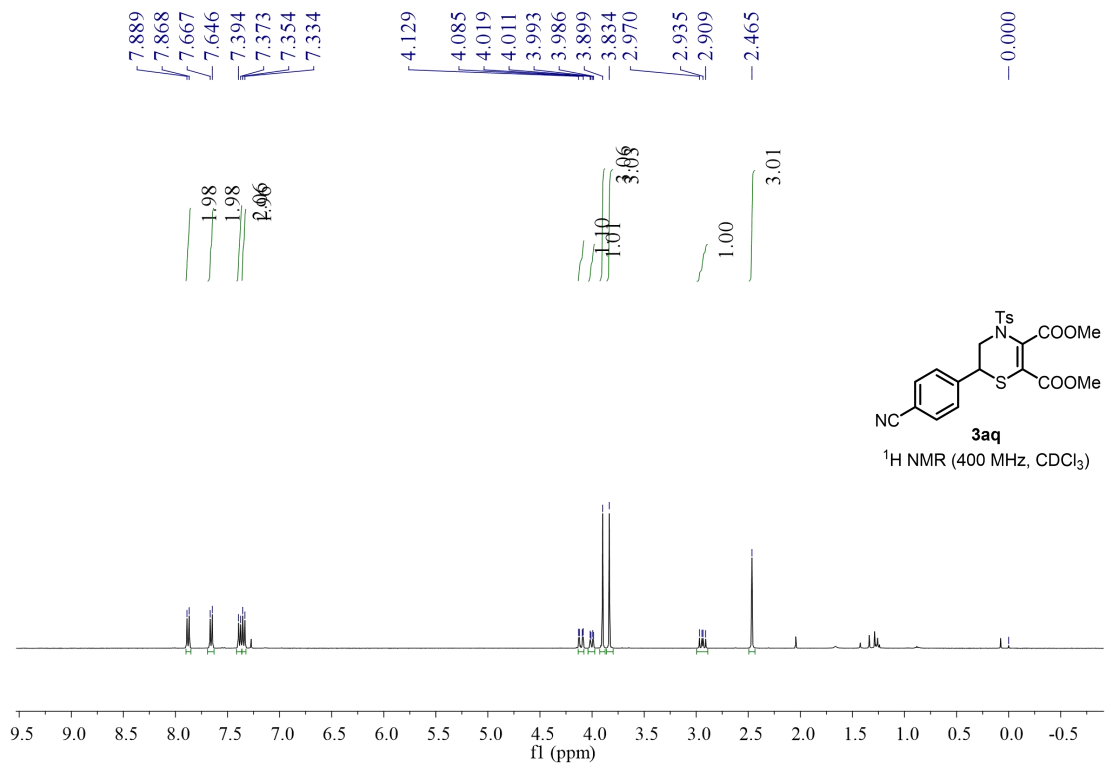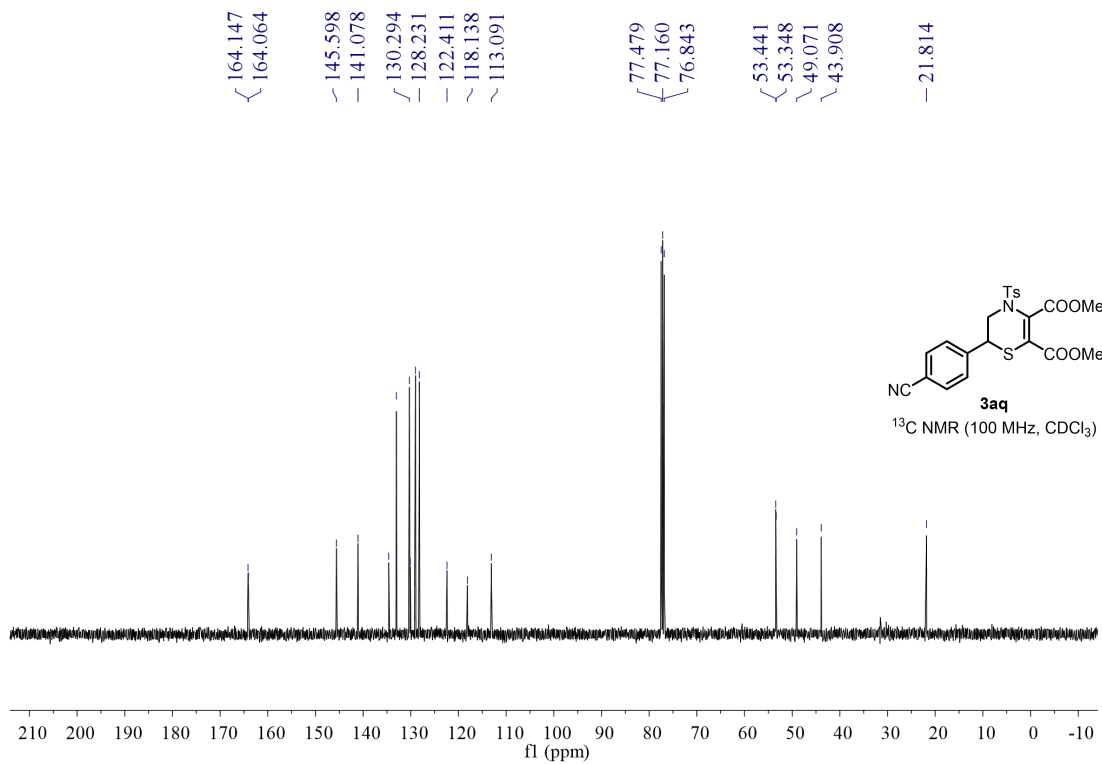

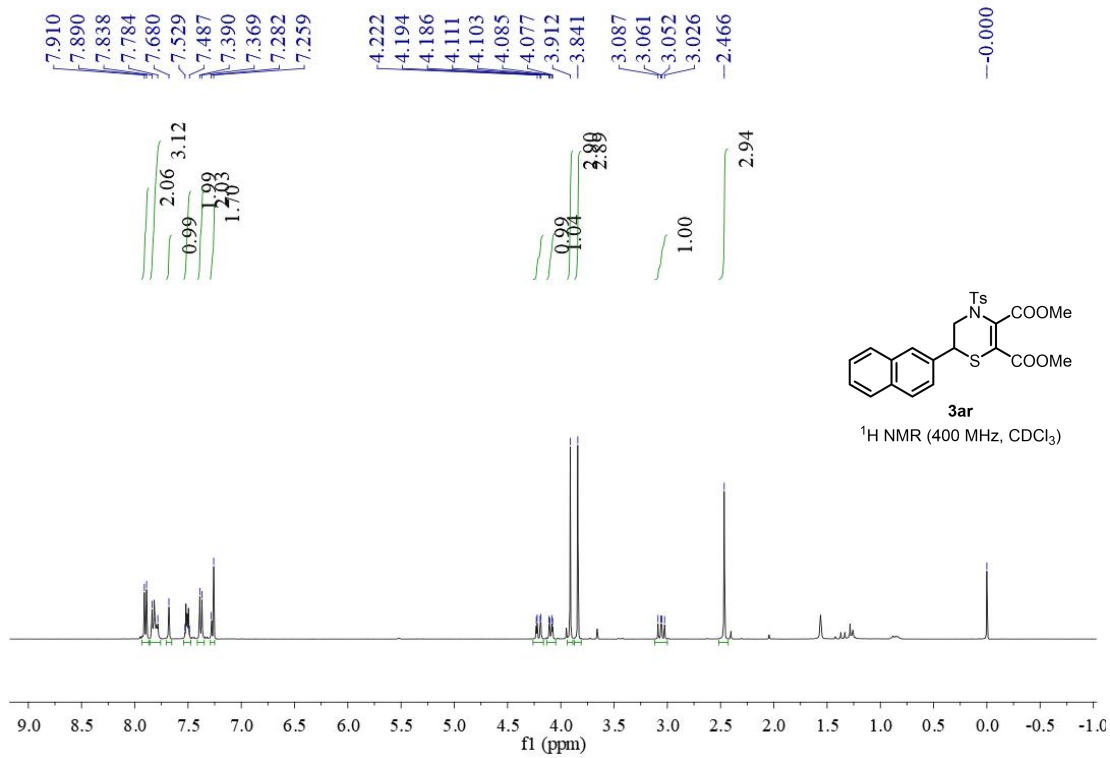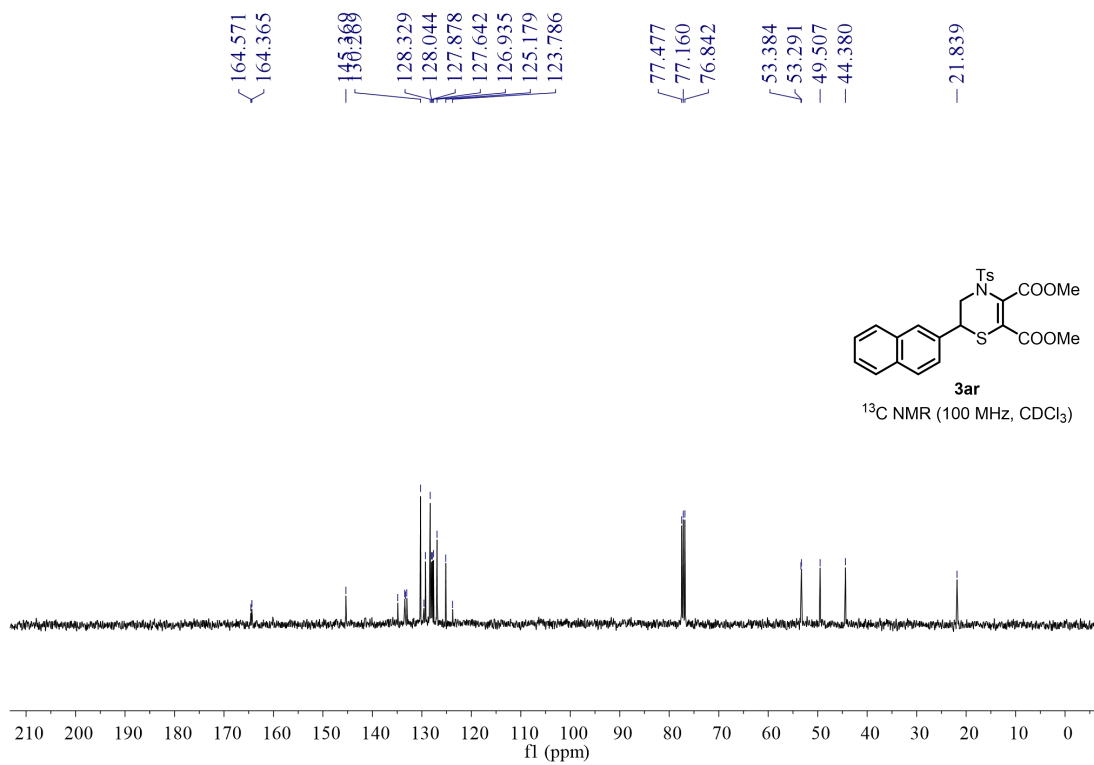

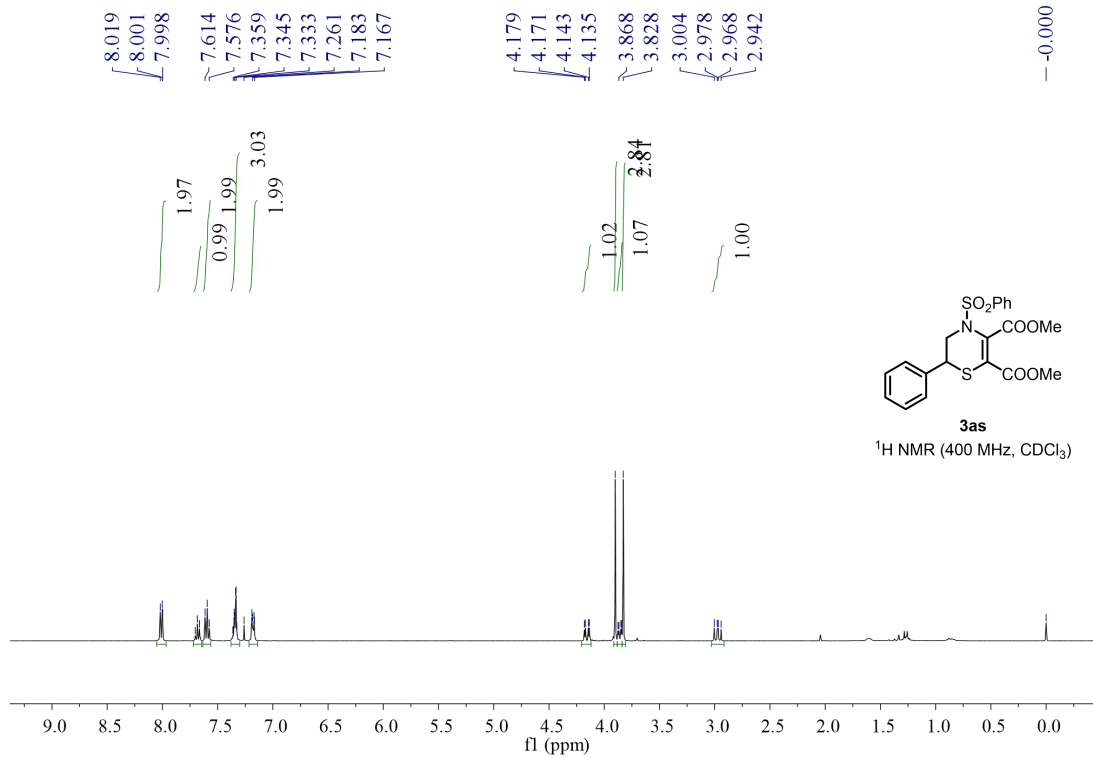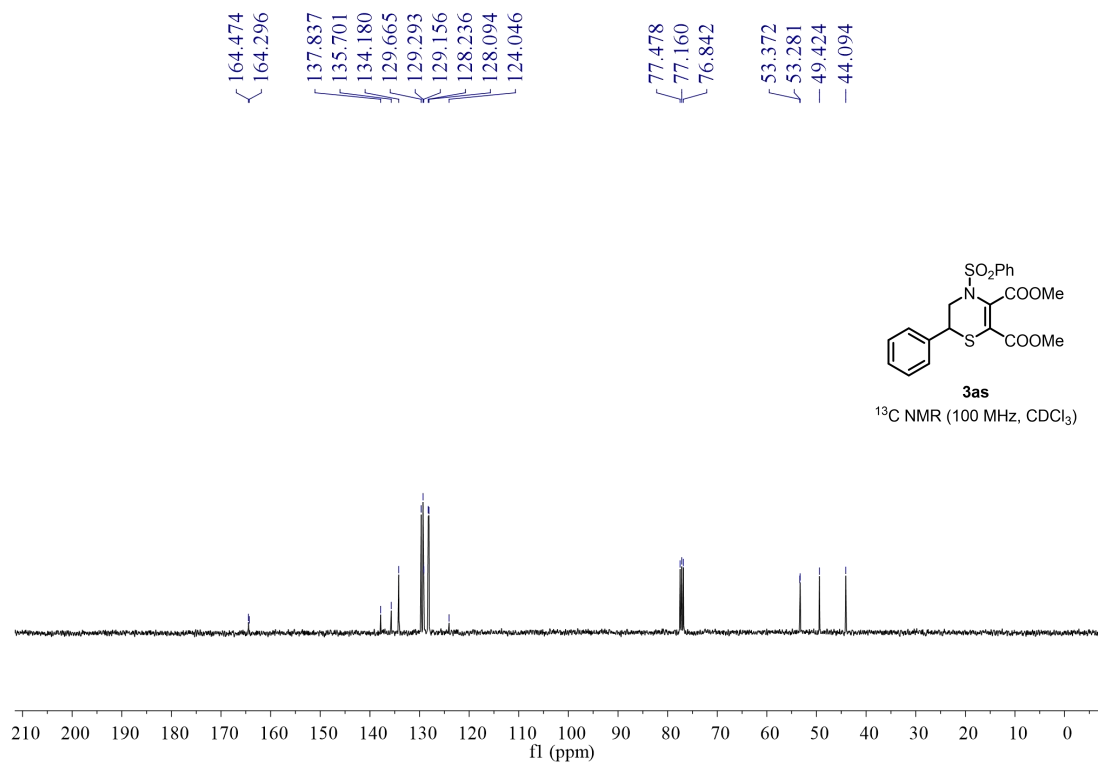

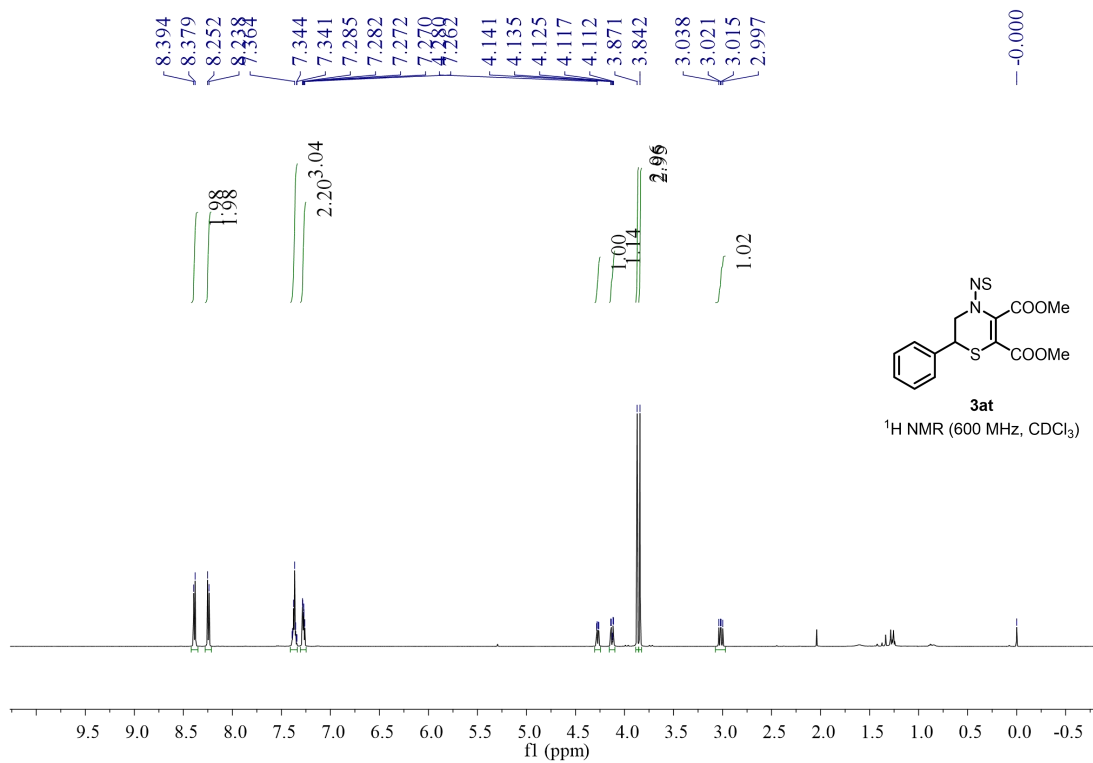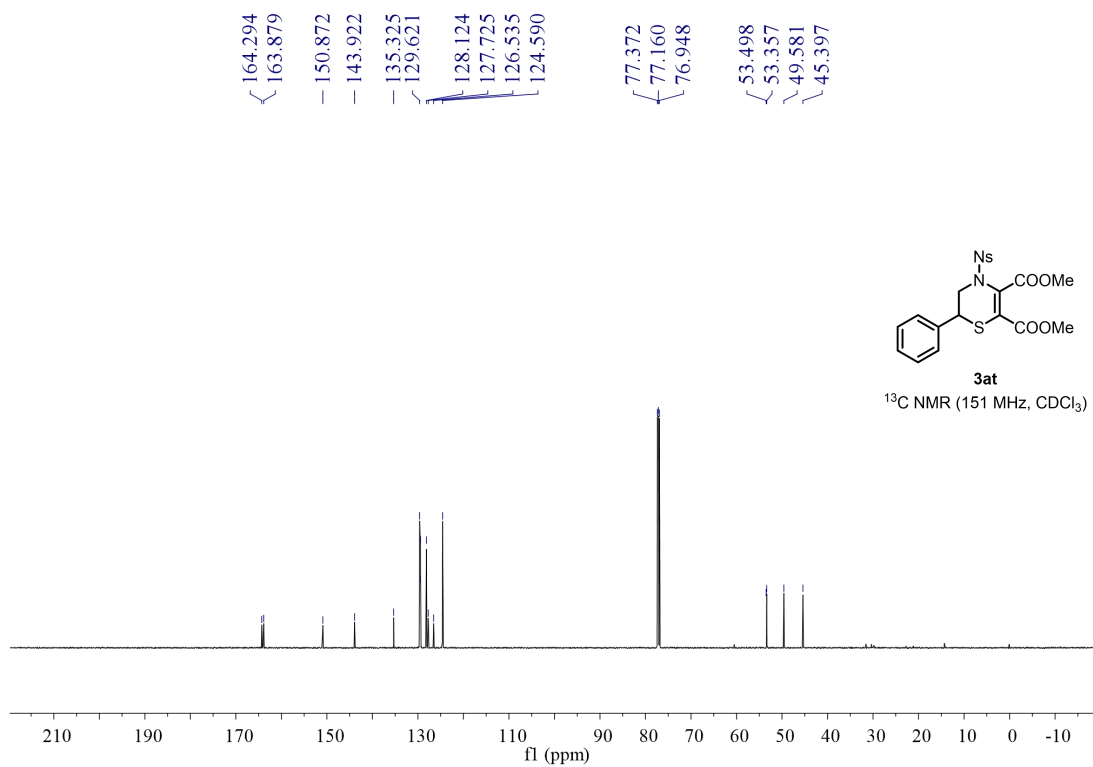

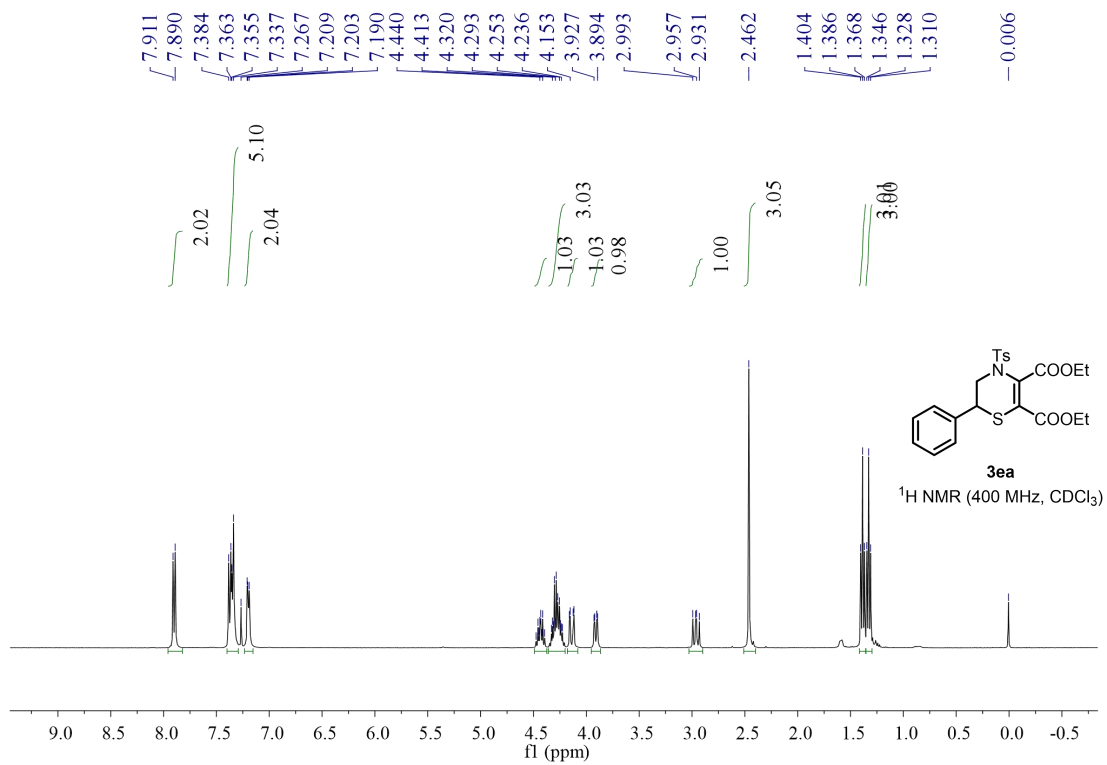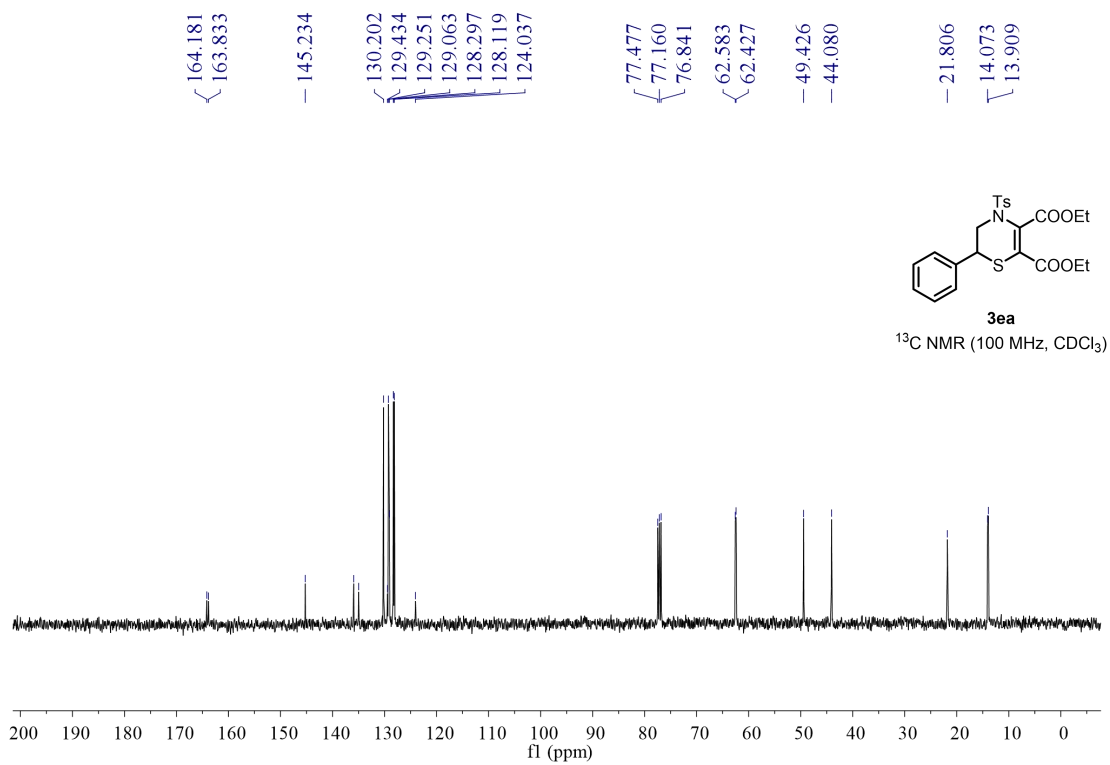

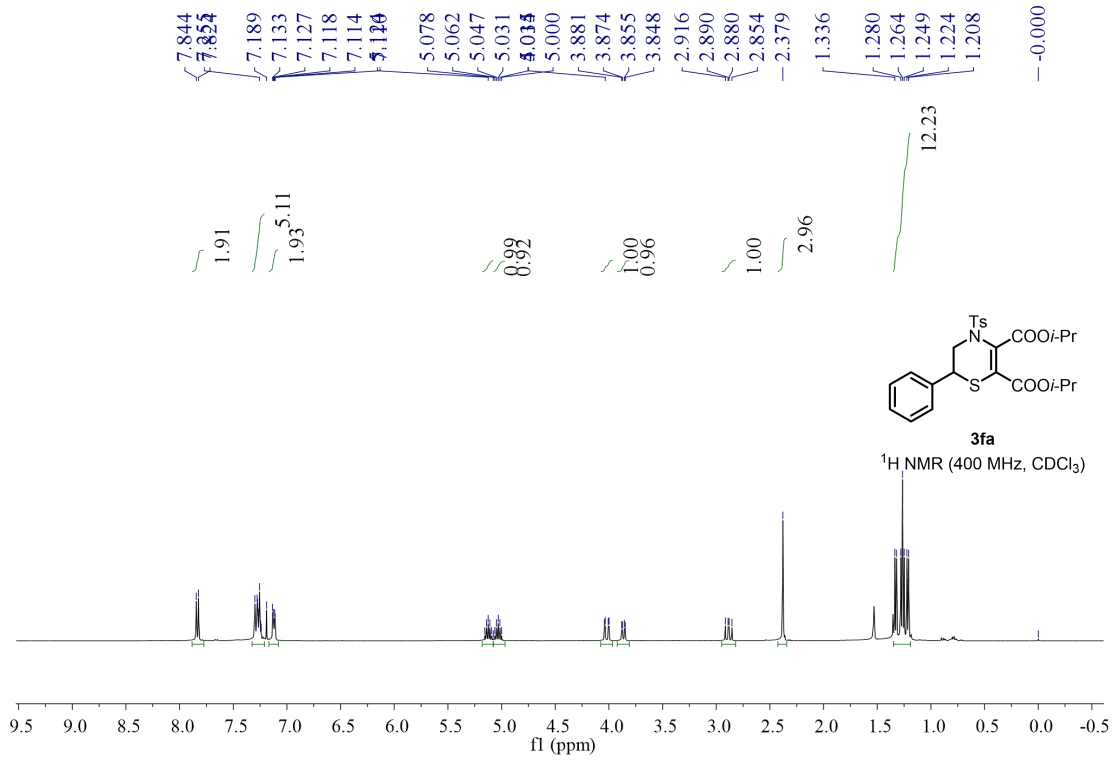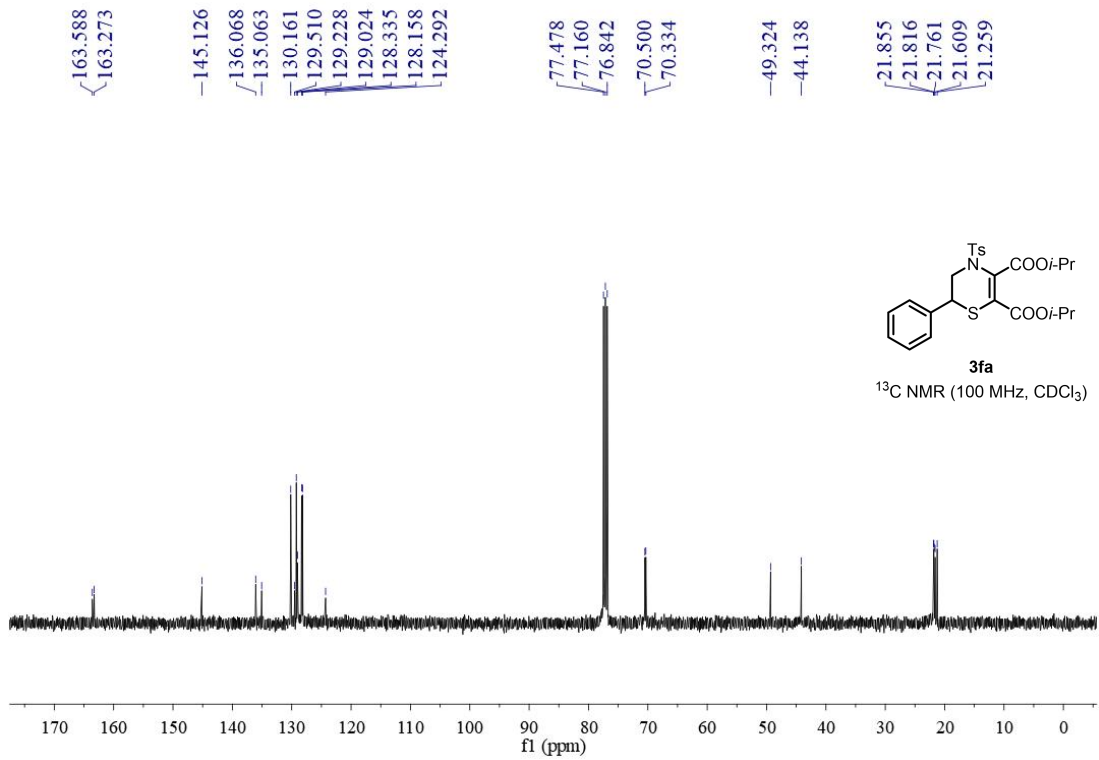



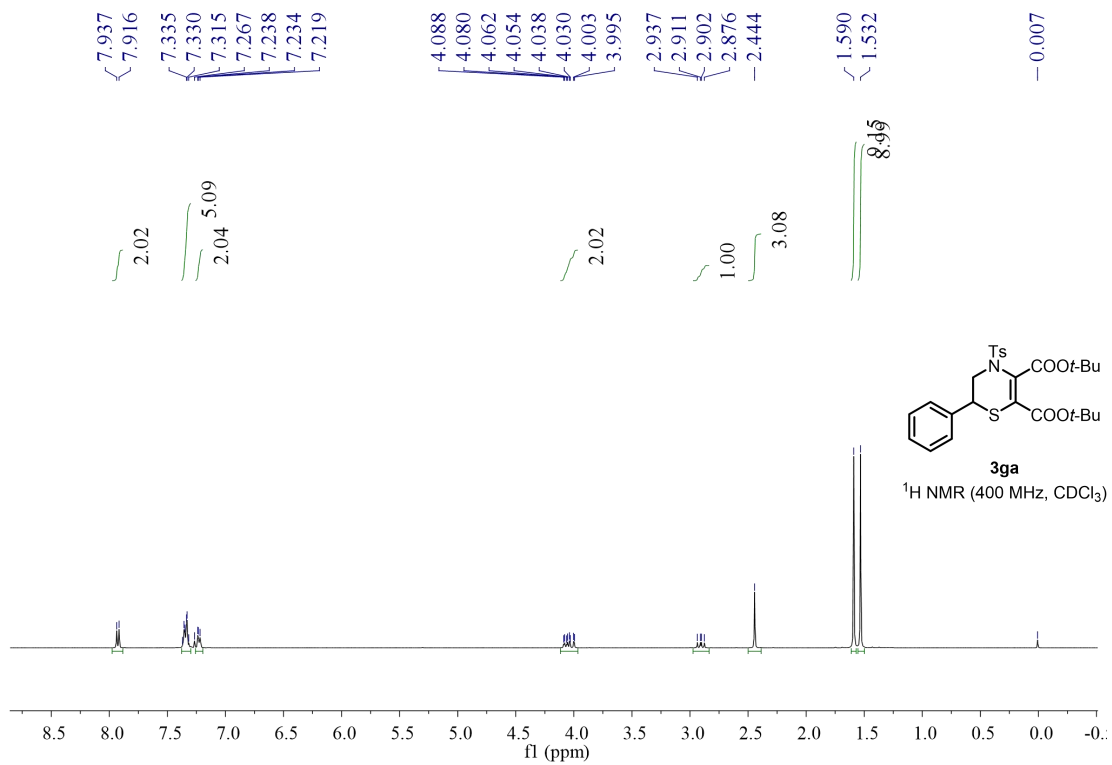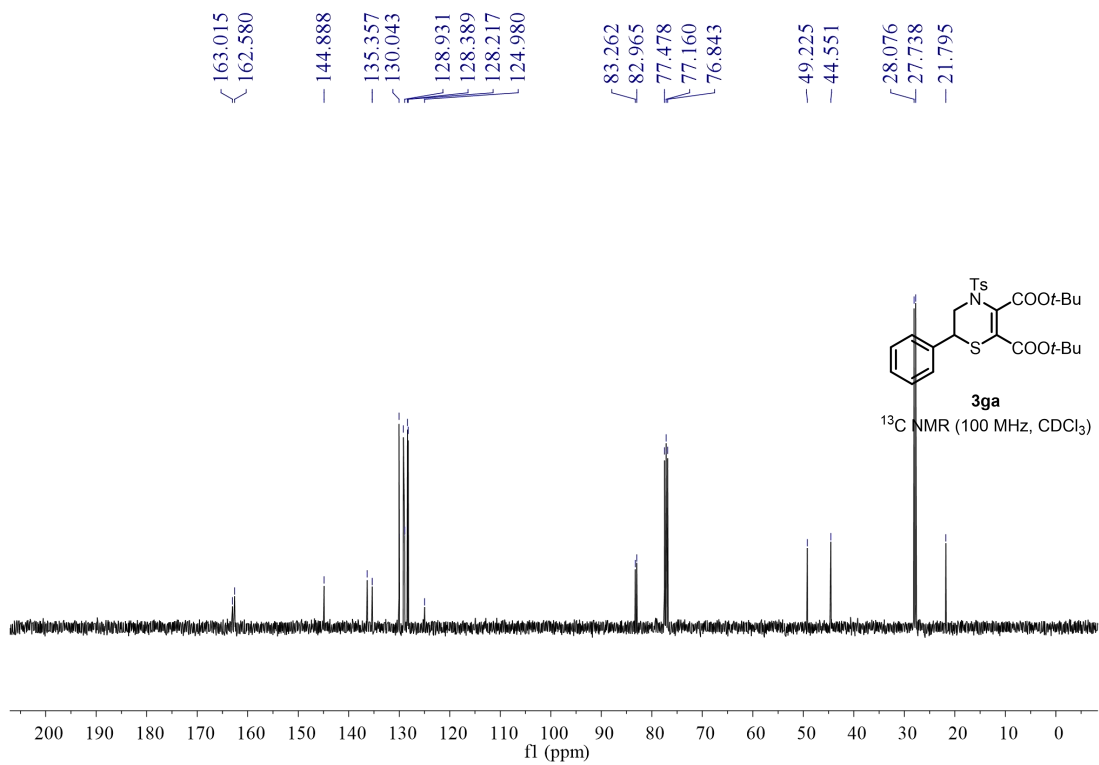

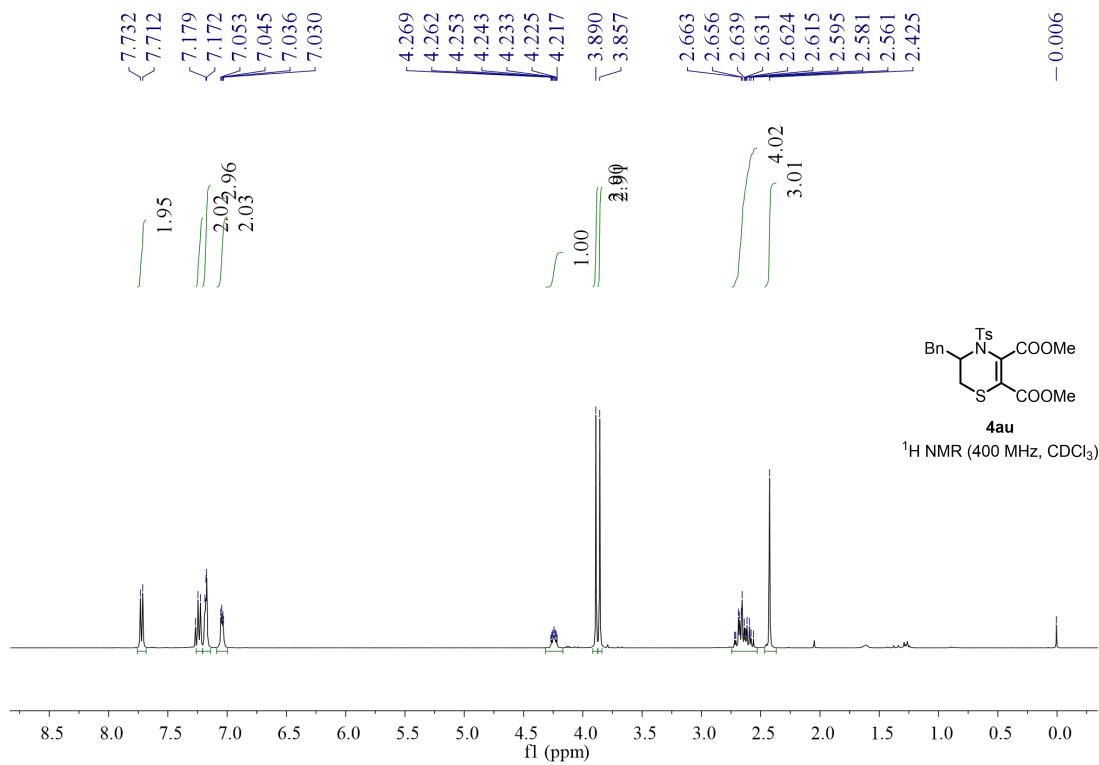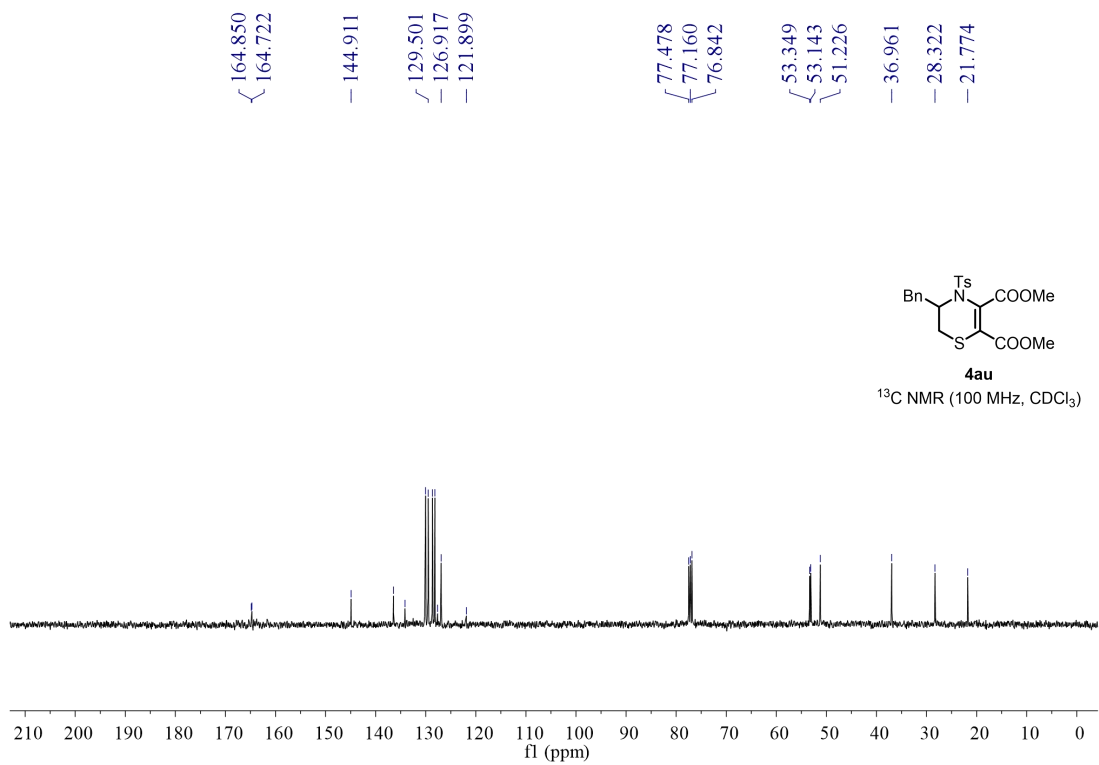

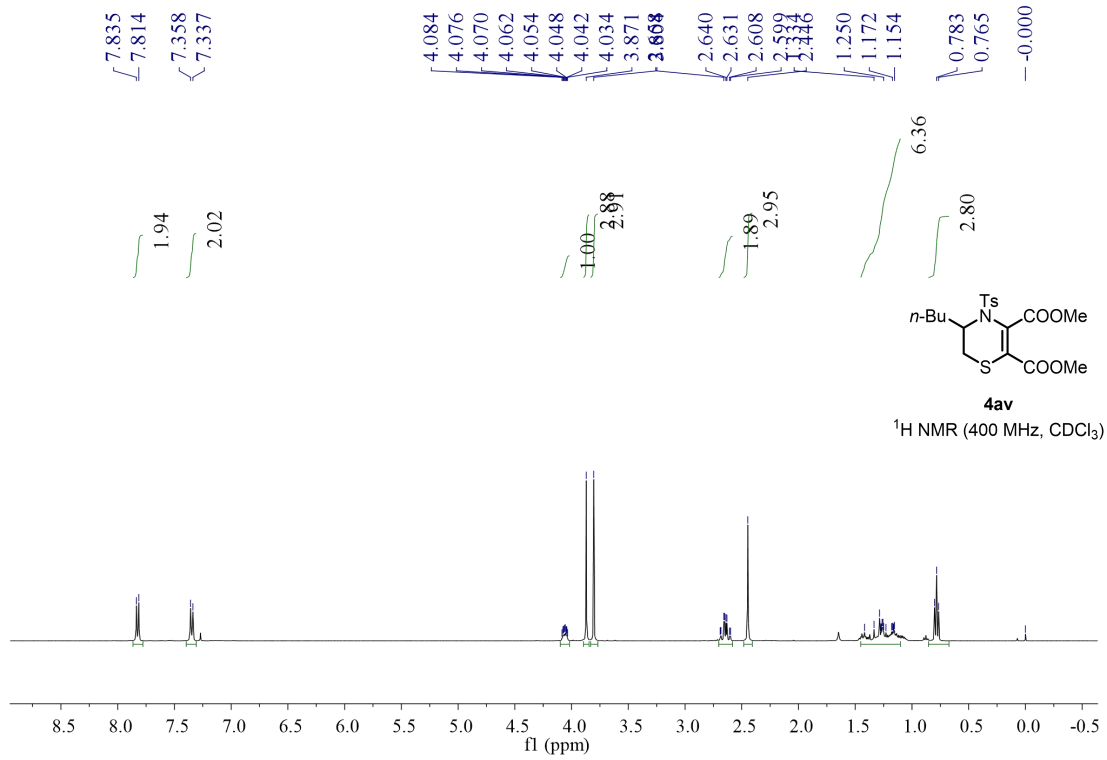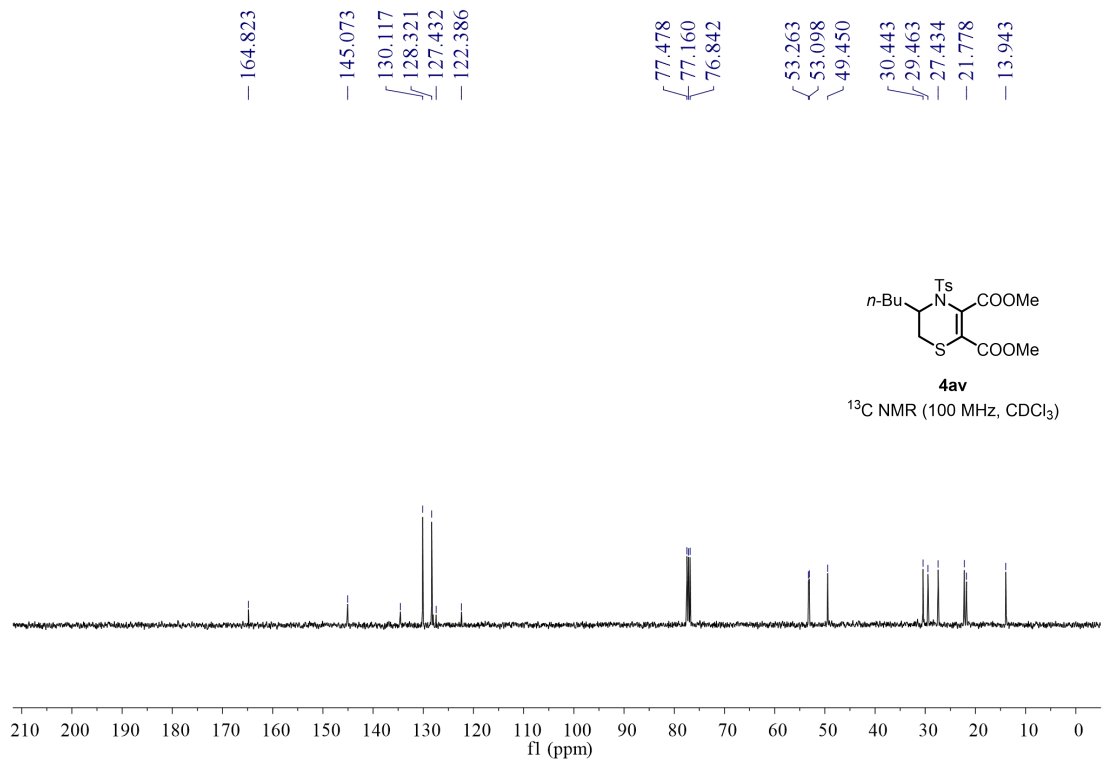

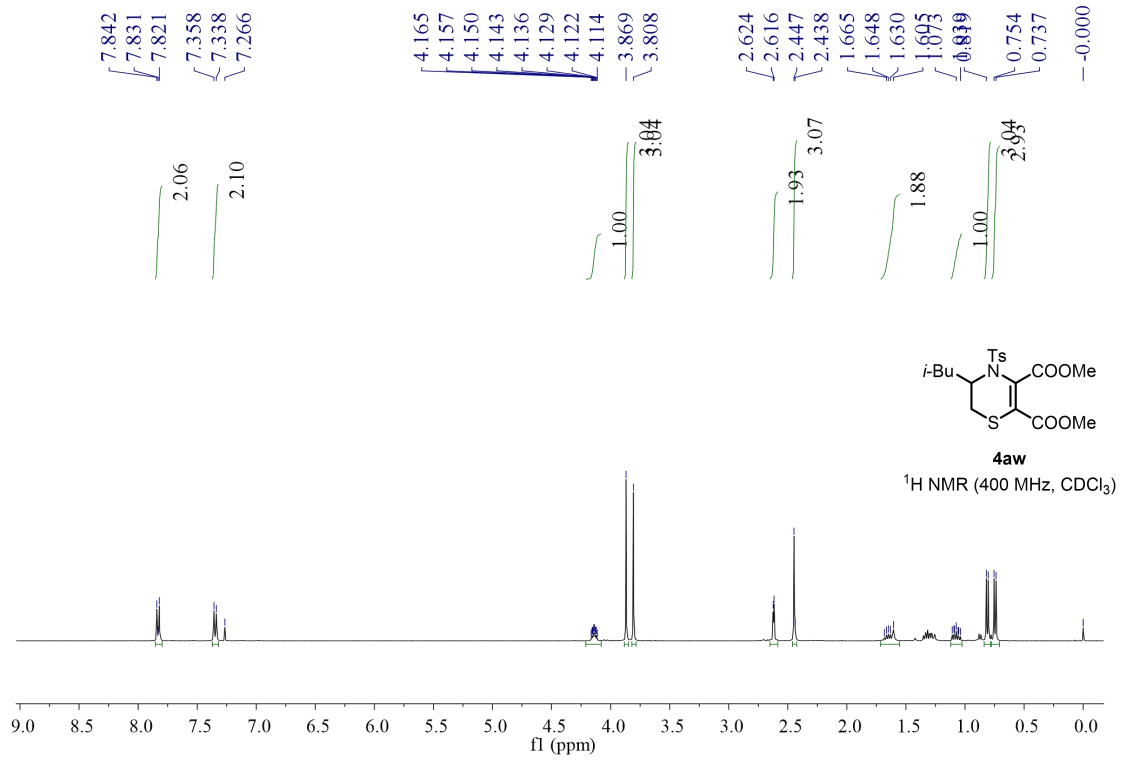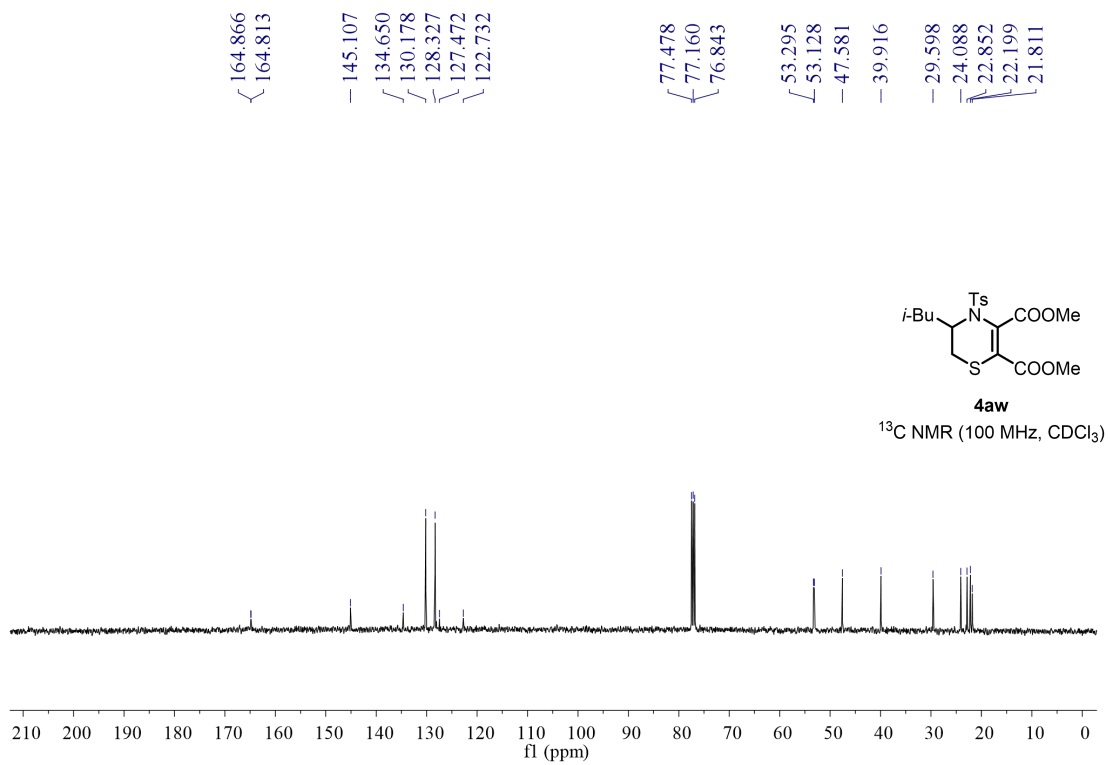

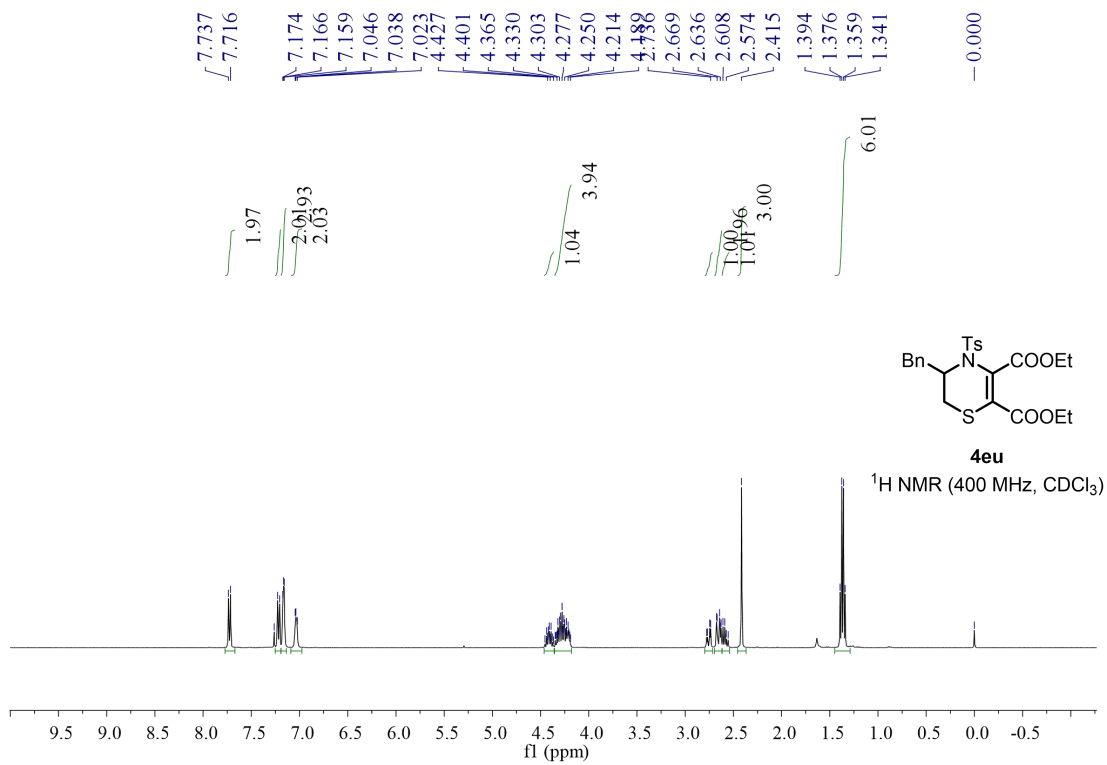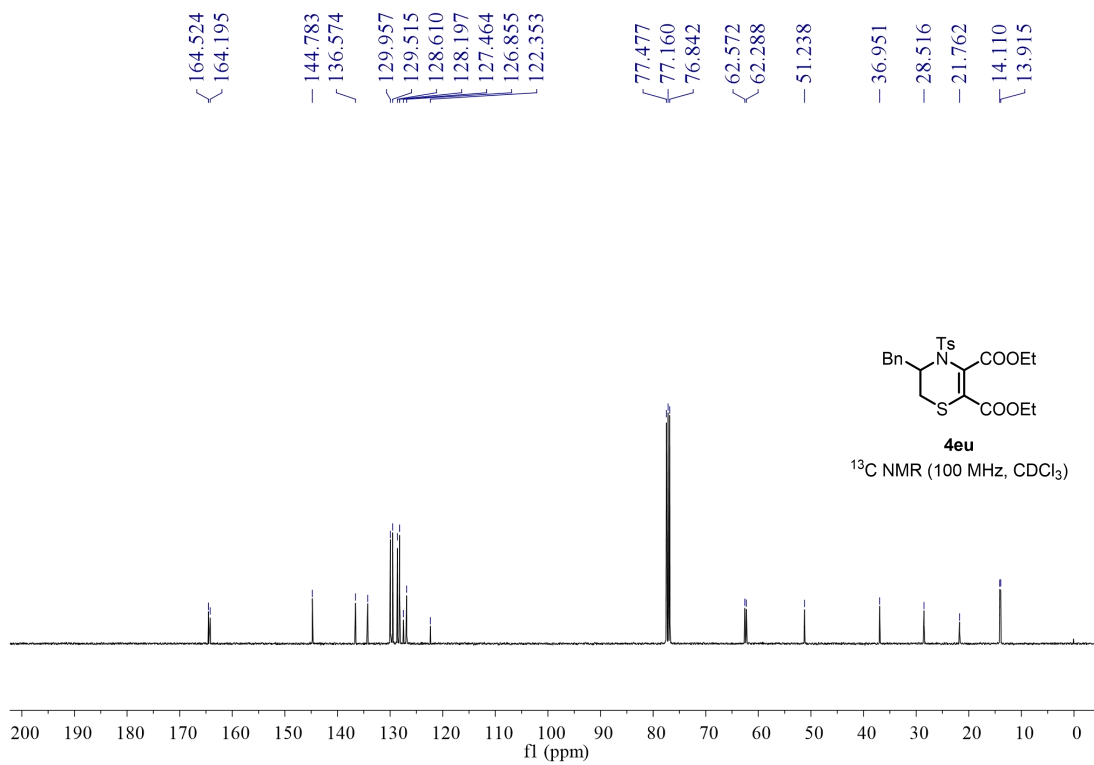

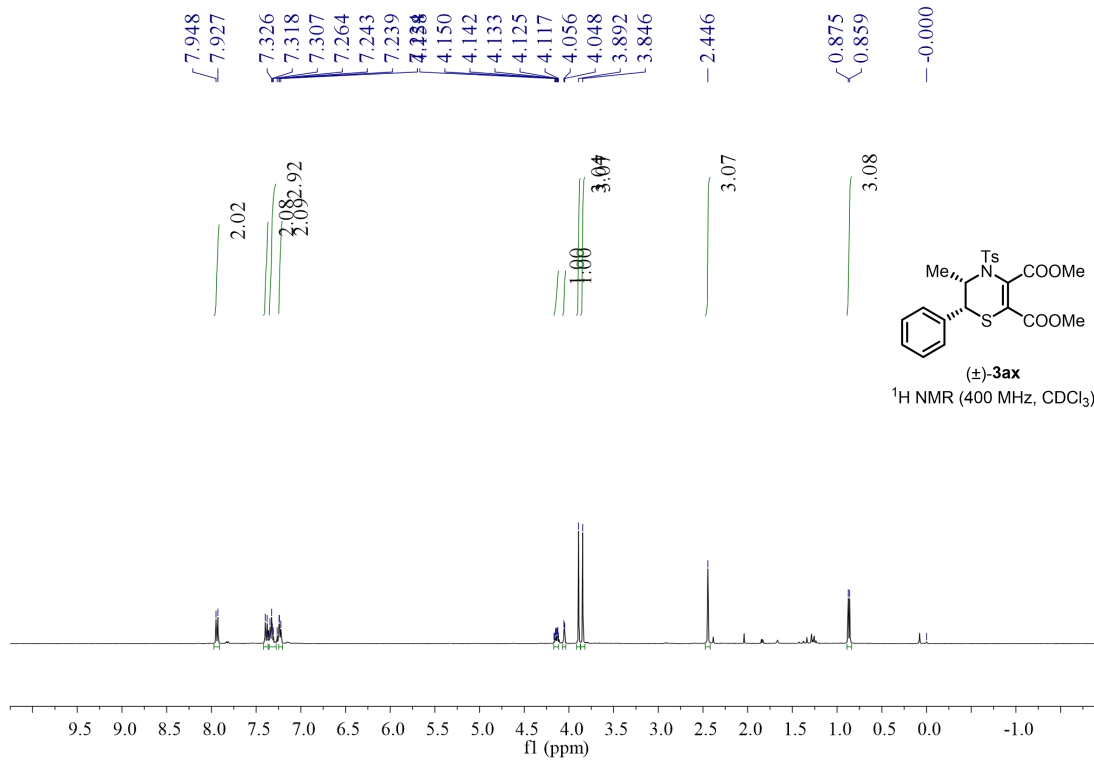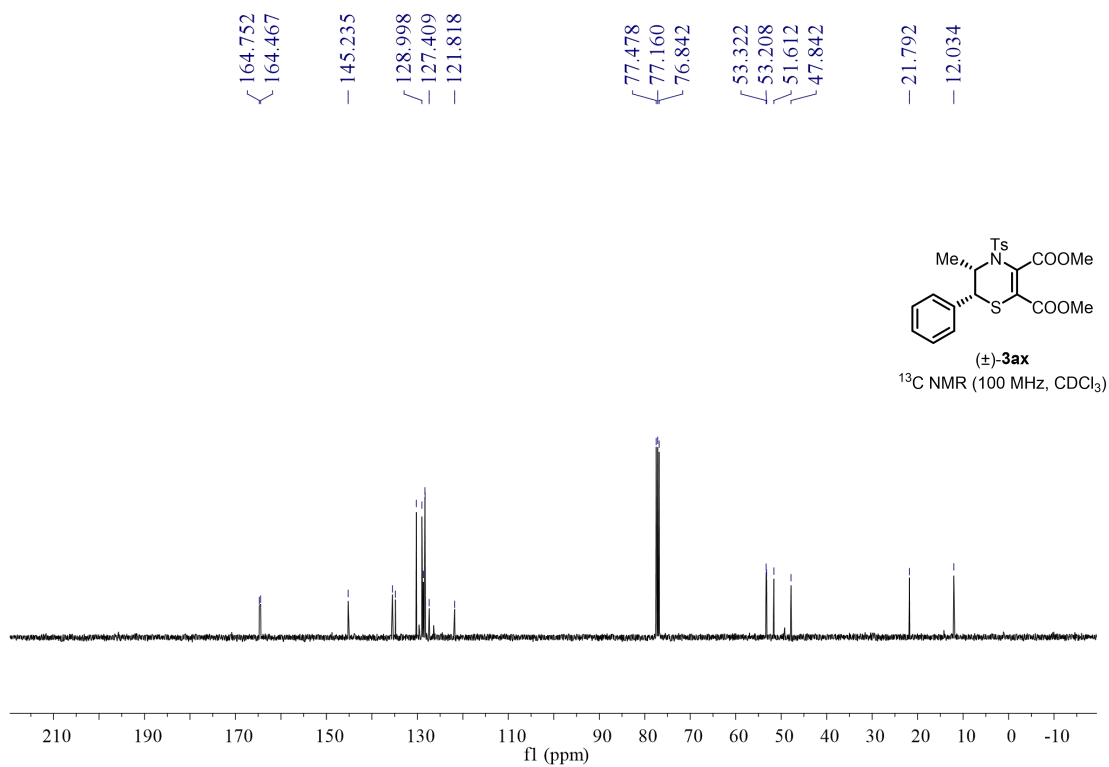

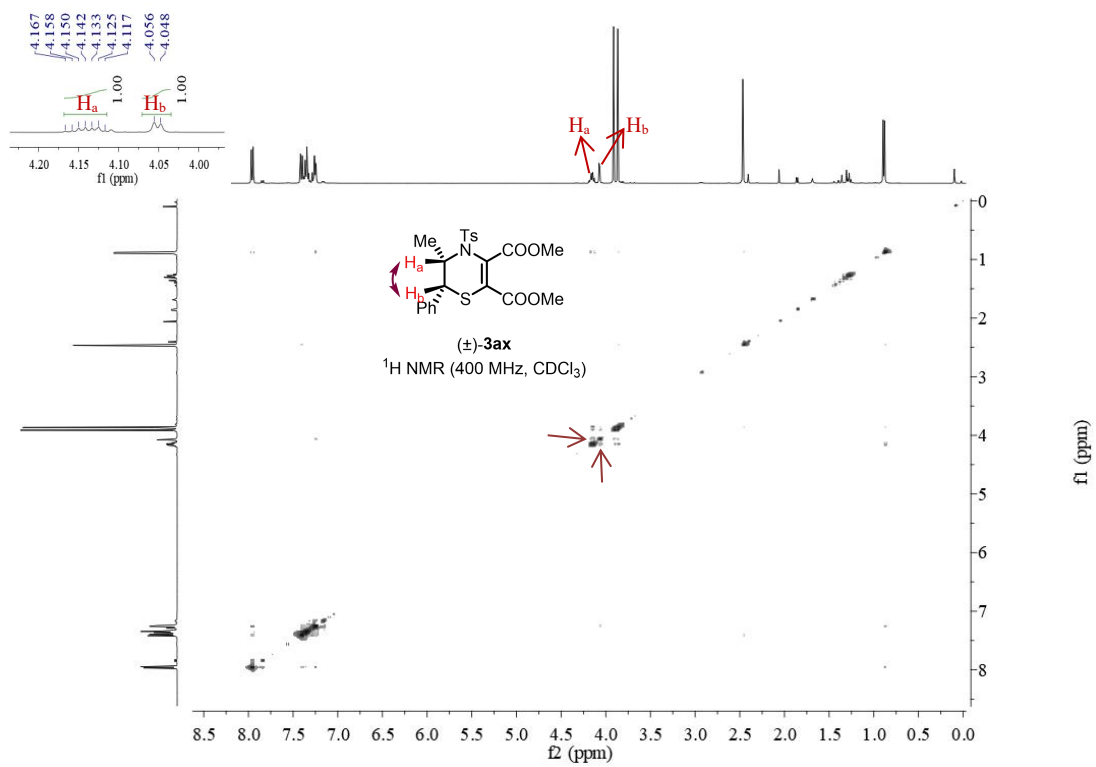

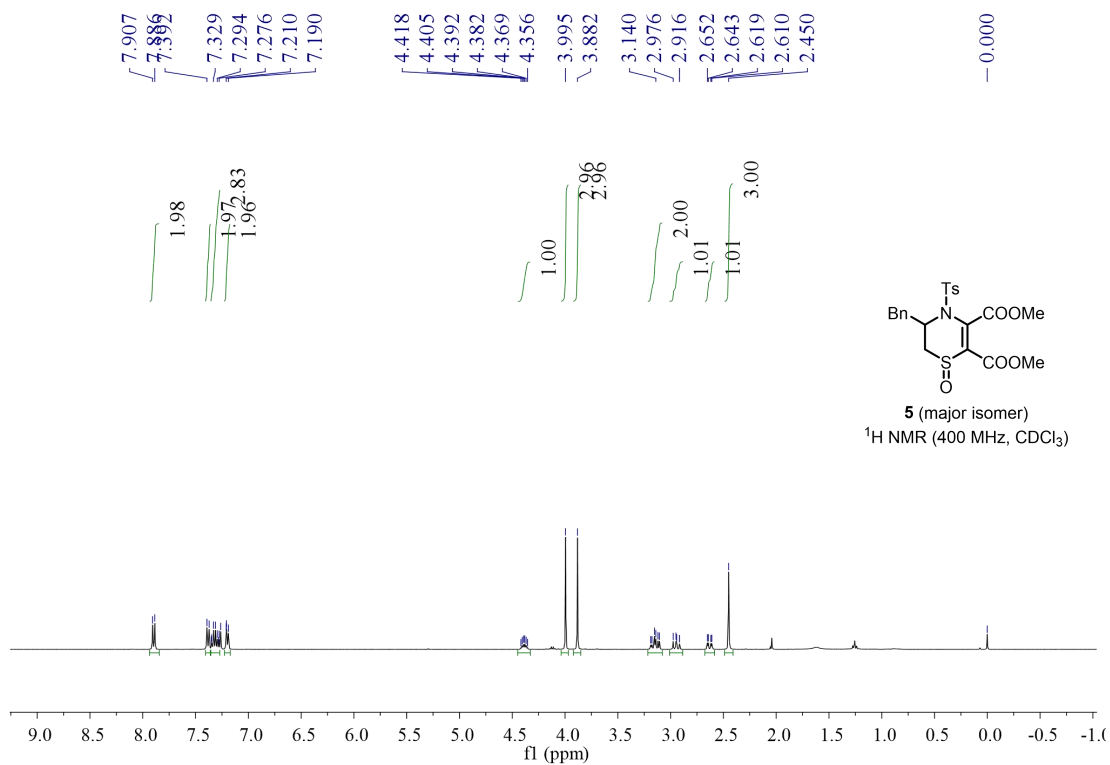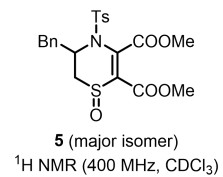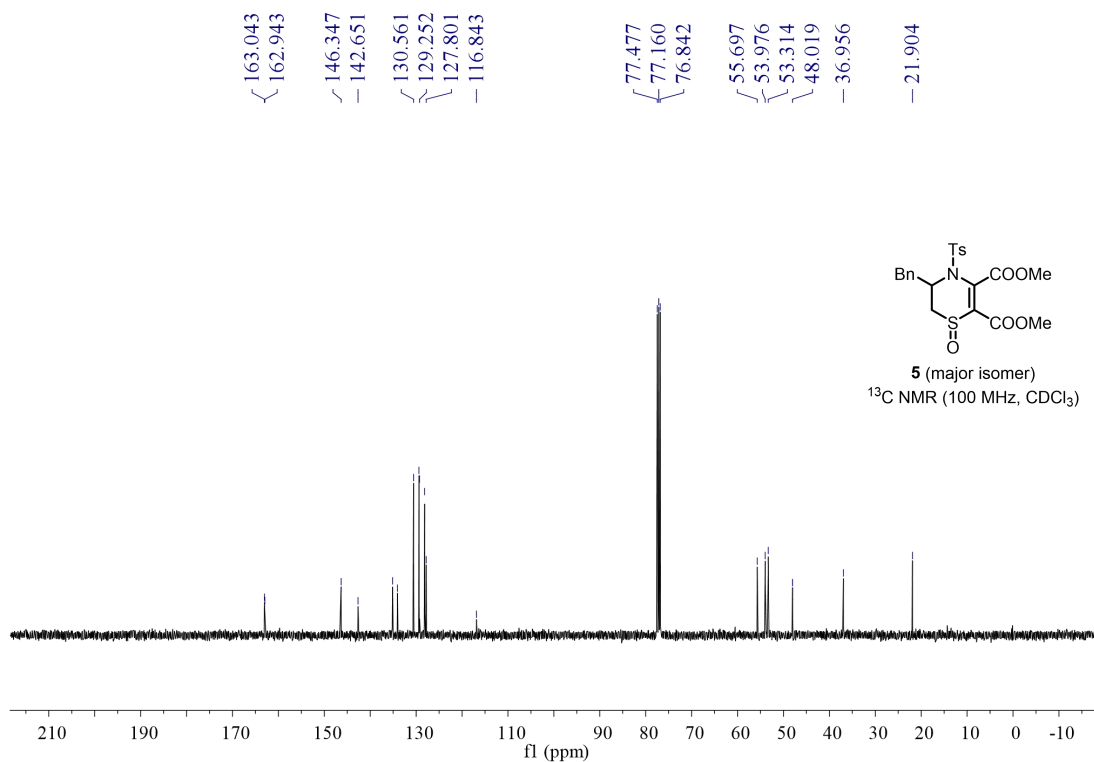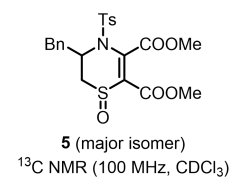



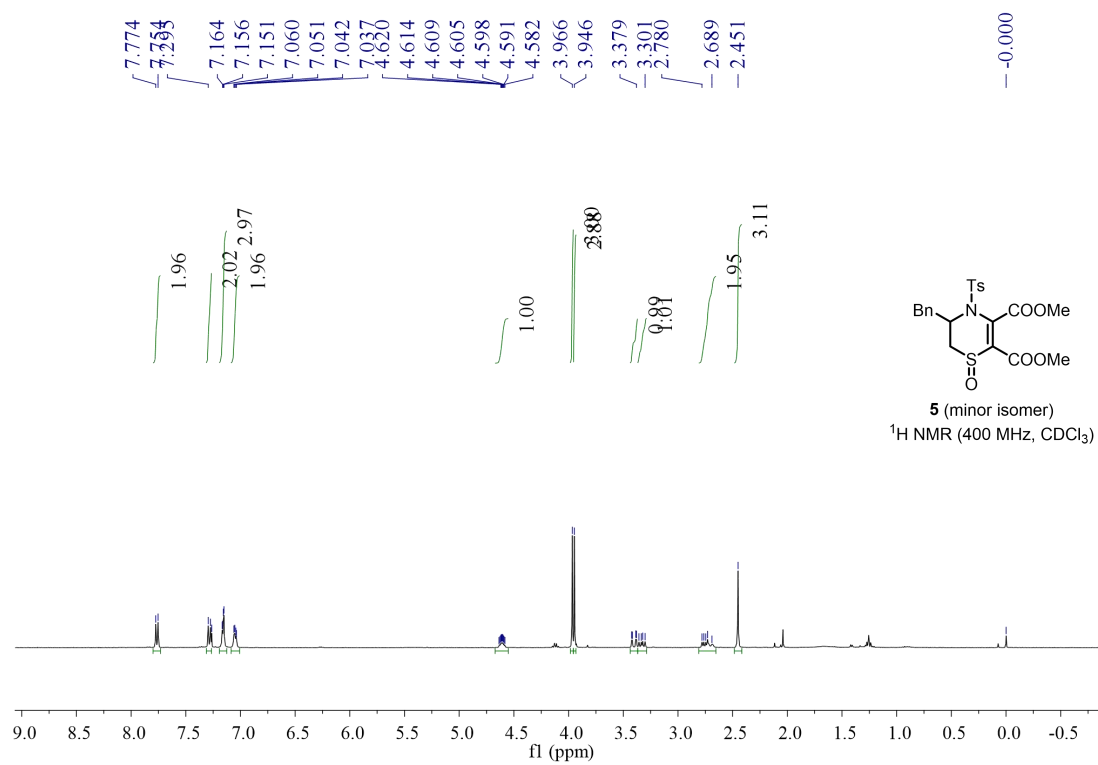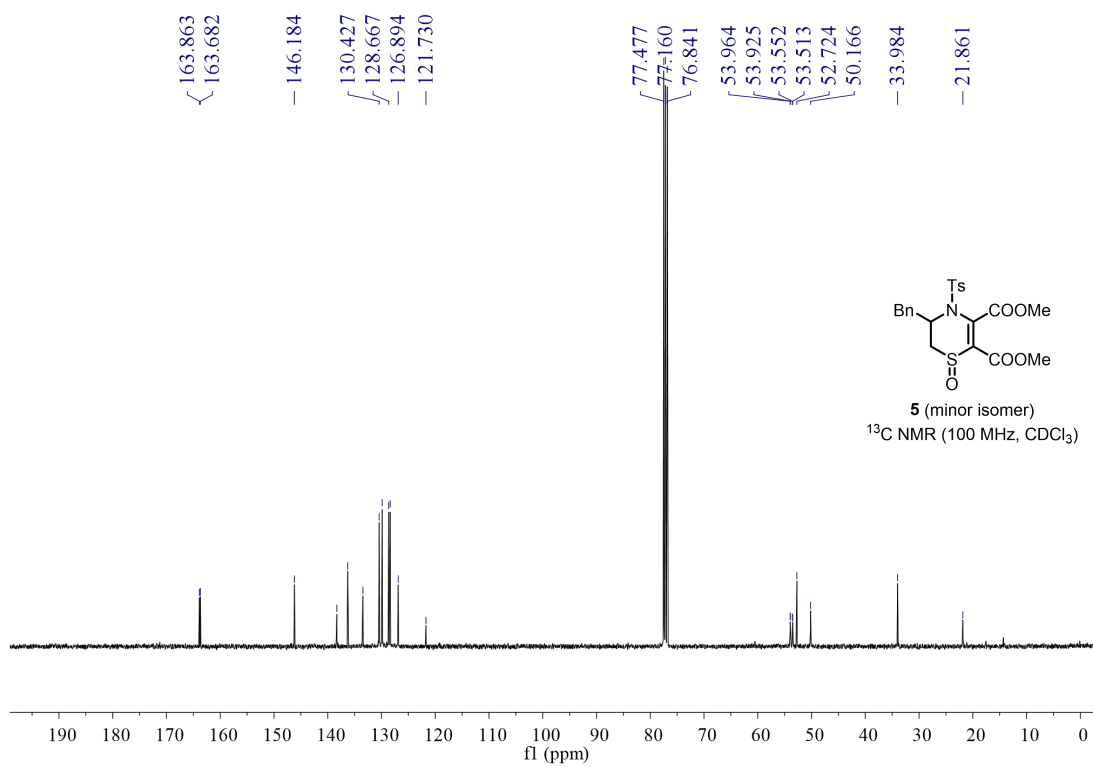

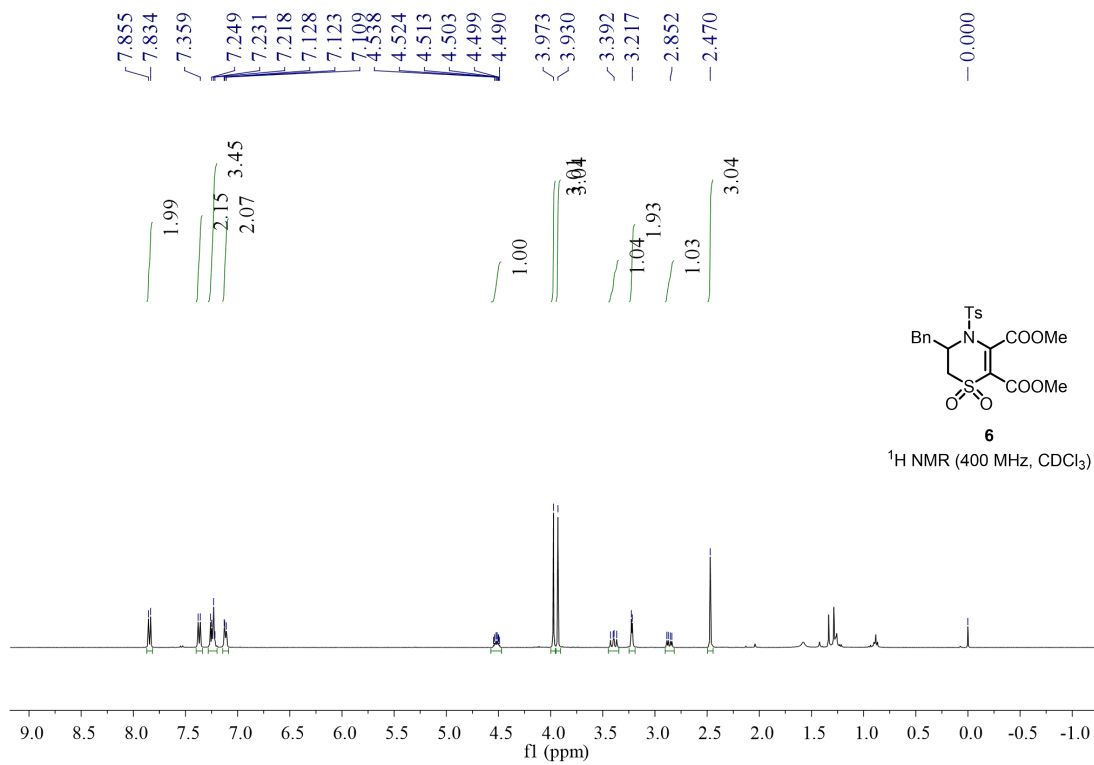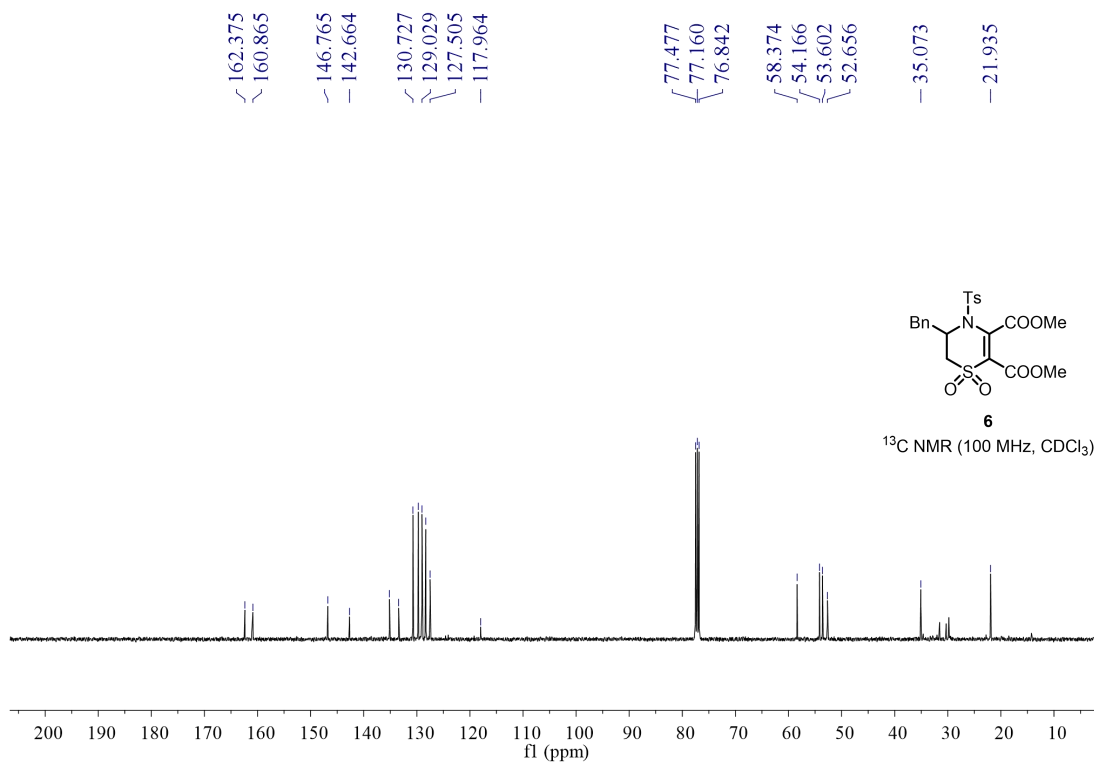

## 5. HPLC Chromatograms

### (1) HPLC chromatogram of 3aa

Enantiomeric excess was determined by HPLC with a Chiralpak<sup>®</sup> IA column (*n*-hexane/*i*-propanol = 85/15, 1.0 mL/min, 210 nm, 25 °C);

$t_r(R) = 15.434$  min,  $t_r(S) = 20.381$  min; >99.9% ee.

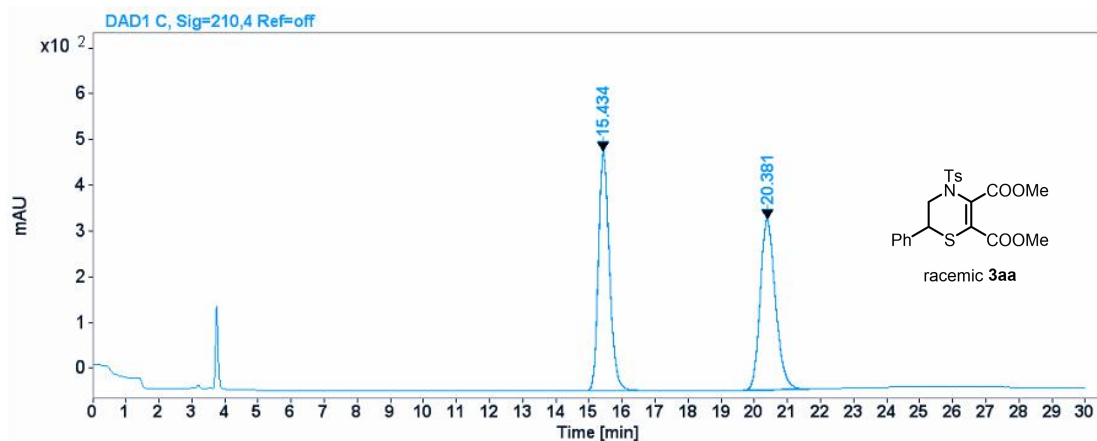

Signal: DAD1 C, Sig=210,4 Ref=off

| RT [min] | Width [min] | Area [mAU*S] | Height [mAU] | Area%   |
|----------|-------------|--------------|--------------|---------|
| 15.434   | 0.352       | 12023.389    | 522.671      | 50.1385 |
| 20.381   | 0.494       | 11956.984    | 372.792      | 49.8615 |
|          | Sum         | 23980.3730   |              |         |

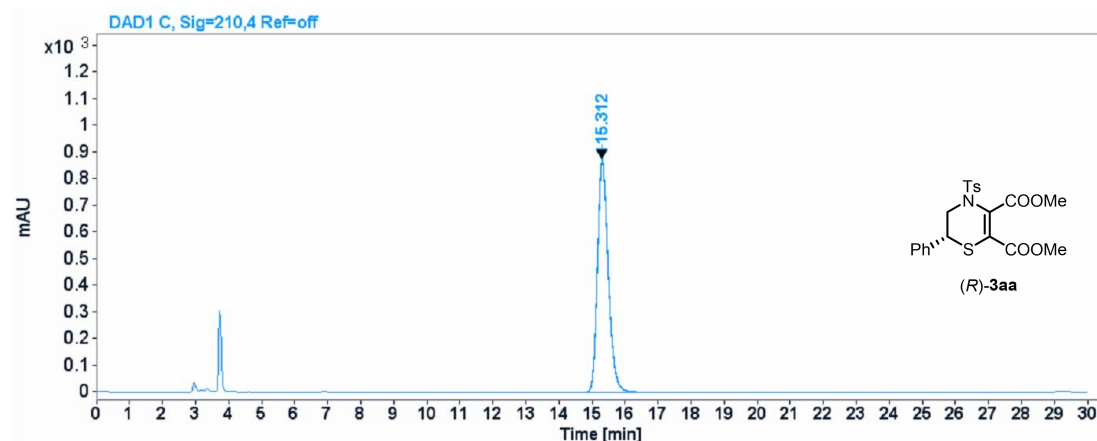

Signal: DAD1 C, Sig=210,4 Ref=off

| RT [min] | Width [min] | Area [mAU*S] | Height [mAU] | Area%    |
|----------|-------------|--------------|--------------|----------|
| 15.312   | 0.351       | 19991.742    | 874.622      | 100.0000 |
|          | Sum         | 19991.7422   |              |          |

## (2) HPLC chromatogram of 4au

Enantiomeric excess was determined by HPLC with a Chiralpak® IA column (*n*-hexane/*i*-propanol = 85/15, 1.0 mL/min, 220 nm, 25 °C);

$t_r(S) = 14.524$  min,  $t_r(R) = 29.690$  min; >99.9% ee.

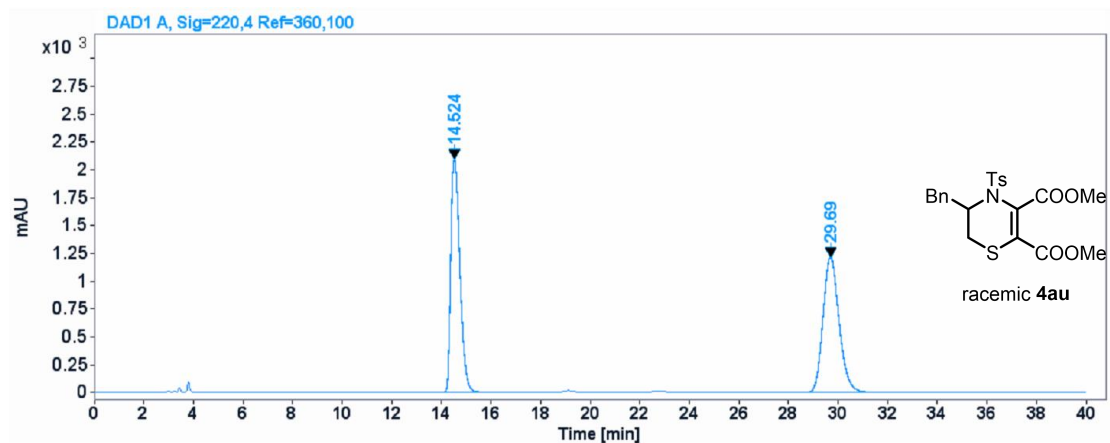

Signal: DAD1 A, Sig=220,4 Ref=360,100

| RT [min] | Width [min] | Area [mAU*S] | Height [mAU] | Area%   |
|----------|-------------|--------------|--------------|---------|
| 14.524   | 0.395       | 52882.863    | 2093.065     | 49.1925 |
| 29.690   | 0.696       | 54618.930    | 1215.952     | 50.8075 |
|          | Sum         | 107501.7930  |              |         |

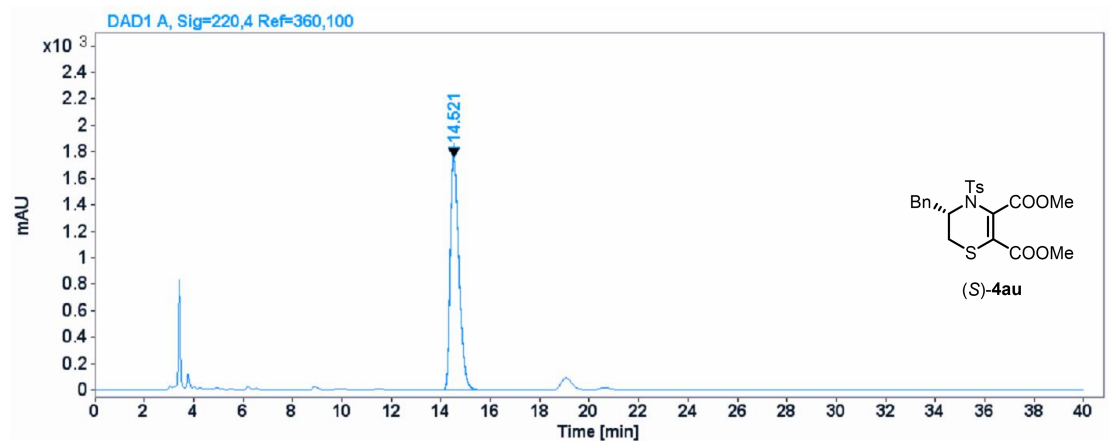

Signal: DAD1 A, Sig=220,4 Ref=360,100

| RT [min] | Width [min] | Area [mAU*S] | Height [mAU] | Area%    |
|----------|-------------|--------------|--------------|----------|
| 14.521   | 0.379       | 42781.031    | 1753.463     | 100.0000 |
|          | Sum         | 42781.0313   |              |          |

## 6. Single-Crystal X-Ray Diffraction Data

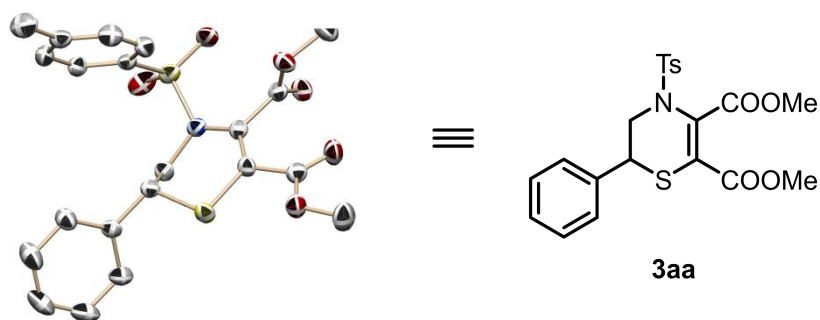

Fig S-1. ORTEP drawing of **3aa** (CCDC 2131863) with 50% ellipsoid probability

|                                         |                                                                |
|-----------------------------------------|----------------------------------------------------------------|
| <b>Identification code</b>              | <b>3aa</b>                                                     |
| <b>Empirical formula</b>                | C <sub>21</sub> H <sub>21</sub> NO <sub>6</sub> S <sub>2</sub> |
| <b>Formula weight</b>                   | 447.51 g/mol                                                   |
| <b>Temperature</b>                      | 173(2) K                                                       |
| <b>Wavelength</b>                       | 0.71073 Å                                                      |
| <b>Crystal system, space group</b>      | Triclinic, P -1                                                |
| <b>Unit cell dimensions</b>             | a = 9.7997(13) Å    α = 89.275(4)°                             |
|                                         | b = 14.3445(19) Å    β = 78.412(4)°                            |
|                                         | c = 15.2780(17) Å    γ = 85.250(5)°                            |
| <b>Volume</b>                           | 2096.6(5) Å <sup>3</sup>                                       |
| <b>Z</b>                                | 4                                                              |
| <b>Absorption coefficient</b>           | 0.293 mm <sup>-1</sup>                                         |
| <b>F(000)</b>                           | 936                                                            |
| <b>Theta range for data collection</b>  | 2.13 to 28.37°                                                 |
| <b>Limiting indices</b>                 | -13 ≤ h ≤ 13, -19 ≤ k ≤ 19, -20 ≤ l ≤ 19                       |
| <b>Absorption correction</b>            | Multi-Scan                                                     |
| <b>Data / parameters</b>                | 10412 / 547                                                    |
| <b>Goodness-of-fit on F<sup>2</sup></b> | 1.026                                                          |
| <b>Final R indices [I &gt; 2σ(I)]</b>   | R1 = 0.0526, wR2 = 0.1114                                      |
| <b>R indices (all data)</b>             | R1 = 0.0938, wR2 = 0.1307                                      |
| <b>Largest diff. peak and hole</b>      | 0.399 and -0.443 eÅ <sup>-3</sup>                              |

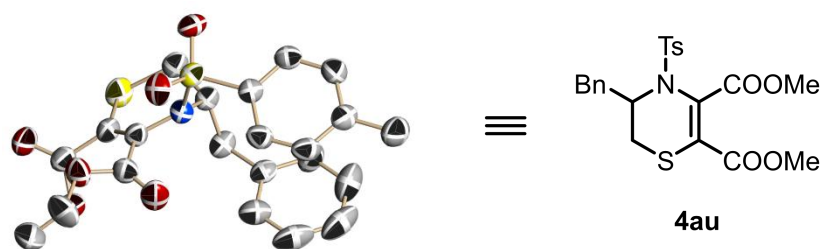

**Fig S-2.** ORTEP drawing of **4au** (CCDC 2131862) with 50% ellipsoid probability

|                                         |                                                                |
|-----------------------------------------|----------------------------------------------------------------|
| <b>Identification code</b>              | <b>4au</b>                                                     |
| <b>Empirical formula</b>                | C <sub>22</sub> H <sub>23</sub> NO <sub>6</sub> S <sub>2</sub> |
| <b>Formula weight</b>                   | 461.53 g/mol                                                   |
| <b>Temperature</b>                      | 303(2) K                                                       |
| <b>Wavelength</b>                       | 0.71073 Å                                                      |
| <b>Crystal system, space group</b>      | Triclinic, P -1                                                |
| <b>Unit cell dimensions</b>             | a = 7.5702(2) Å    α = 105.3577(14)°                           |
|                                         | b = 16.2305(6) Å    β = 92.5527(13)°                           |
|                                         | c = 19.0613(7) Å    γ = 90.4286(14)°                           |
| <b>Volume</b>                           | 2255.7(2) Å <sup>3</sup>                                       |
| <b>Z</b>                                | 4                                                              |
| <b>Absorption coefficient</b>           | 0.274 mm <sup>-1</sup>                                         |
| <b>F(000)</b>                           | 968                                                            |
| <b>Theta (max)</b>                      | 28.49°                                                         |
| <b>Limiting indices</b>                 | -10 ≤ h ≤ 10, -21 ≤ k ≤ 21, -25 ≤ l ≤ 25                       |
| <b>Absorption correction</b>            | Multi-Scan                                                     |
| <b>Data / parameters</b>                | 11319 / 565                                                    |
| <b>Goodness-of-fit on F<sup>2</sup></b> | 1.016                                                          |
| <b>Final R indices [I &gt; 2σ(I)]</b>   | R1 = 0.0469                                                    |
| <b>R indices (all data)</b>             | wR2 = 0.1254                                                   |
